# Supplementary material for: New synthesis of a late-stage tetracyclic key intermediate of lumateperone
Source: publisher site journal article supplement (doi:10.3762/bjoc.18.66), 2022-06-10

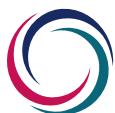

## Supporting Information

for

### **New synthesis of a late-stage tetracyclic key intermediate of lumateperone**

Mátyás Milen, Bálint Nyulasi, Tamás Nagy, Gyula Simig and Balázs Volk

*Beilstein J. Org. Chem.* **2022**, *18*, 653–659. doi:10.3762/bjoc.18.66

### **General information, synthetic procedures, and spectral data**

## Table of contents

|                             |     |
|-----------------------------|-----|
| 1. General information..... | S2  |
| 2. Synthesis .....          | S3  |
| 3. References .....         | S10 |
| 4. NMR and IR spectra ..... | S11 |

## General information

All melting points were determined on a Büchi–Boëtius microapparatus and are uncorrected. IR spectra were obtained on a Bruker Alpha FT-IR spectrometer in KBr pellets.  $^1\text{H}$  NMR and  $^{13}\text{C}$  NMR spectra were recorded in  $\text{DMSO}-d_6$  or  $\text{CDCl}_3$  solution in 5 mm tubes at room temperature, on a Bruker Avance III HD 600 (600 and 150 MHz for  $^1\text{H}$  and  $^{13}\text{C}$  NMR spectra, respectively) or a Bruker Avance III 400 (400 and 100 MHz for  $^1\text{H}$  and  $^{13}\text{C}$  NMR spectra, respectively) spectrometer with the deuterium signal of the solvent as the lock and TMS as the internal standard. Chemical shifts ( $\delta$ ) and coupling constants ( $J$ ) are given in ppm and in Hz, respectively. The following abbreviations are used to designate multiplicities: s = singlet, d = doublet, t = triplet, q = quartet, m = multiplet, br = broad. Mass spectra were recorded on a Bruker O-TOF MAXIS Impact mass spectrometer coupled to a Dionex Ultimate 3000 RS HPLC system with a diode array detector. High-resolution mass spectra (HRMS) were recorded on a Bruker O-TOF MAXIS Impact mass spectrometer coupled with a Waters I-Class UPLC system with a diode array detector. Reactions were monitored by thin-layer chromatography (TLC) carried out on silica gel plates (60 F<sub>254</sub>) using UV light as visualizing agent. Purifications by flash column chromatography were carried out using Merck 107736 silica gel 60 H with a hexane/EtOAc or  $\text{CH}_2\text{Cl}_2/\text{MeOH}$  solvent system. All reagents were purchased from commercial sources and were used without further purification. Analytical samples of new compounds were obtained by recrystallization from the solvents or solvent mixtures given after the melting points in parentheses. Compounds ( $\pm$ )-**9**, **25**, **26**, **28**, **29**, **31**, ( $\pm$ )-**36**, and **38** are known from the literature, but insufficiently or not at all [( $\pm$ )-**36**] characterized [1,2], therefore they are described below. New compounds **27**, **30**, **34**, and ( $\pm$ )-**35** are also characterized below in detail.

## Synthesis

**1-Methylquinoxalin-1-ium *p*-toluenesulfonate (25).** This compound was prepared by a published method [3]. A mixture of quinoxaline (**24**, 10.0 g, 76.8 mmol) and methyl *p*-toluenesulfonate (27.17 g, 22.0 mL, 145.9 mmol, 1.9 equiv) was kept at room temperature for 2 d. The resulting solid was suspended in DEE (30 mL), filtered, and washed with DEE (10 mL). Yield: 19.93 g (82%). Colorless crystals. Mp 156–158 °C (EtOH–Et<sub>2</sub>O, lit. mp 150–152 °C [4]). <sup>1</sup>H NMR (CDCl<sub>3</sub>, 400 MHz): δ 9.69–9.65 (m, 1H), 9.61–9.56 (m, 1H), 8.64–8.58 (m, 1H), 8.54–8.48 (m, 1H), 8.36–8.26 (m, 2H), 7.46–7.41 (m, 2H), 7.10–7.04 (m, 2H), 4.73 (s, 3H), 2.27 (s, 3H) ppm. <sup>13</sup>C NMR (CDCl<sub>3</sub>, 100 MHz): δ 148.2, 145.9, 145.0, 141.9, 137.7, 135.8, 133.8, 131.2, 131.0, 128.2, 125.6, 119.8, 45.8, 20.9 ppm.

**1-Methyl-1,2,3,4-tetrahydroquinoxaline (26).** This compound was prepared by a published method [3]. NaBH<sub>4</sub> (1.80 g, 47.6 mmol) was dissolved in H<sub>2</sub>O (51 mL) and cooled to 0 °C. 1-Methylquinoxalin-1-ium *p*-toluenesulfonate (**25**, 5.00 g, 15.8 mmol) was dissolved in H<sub>2</sub>O (10 mL) and added dropwise to the NaBH<sub>4</sub> solution over a period of 0.5 h. The mixture was stirred for an additional 10 min at 0 °C, then extracted with CH<sub>2</sub>Cl<sub>2</sub> (3 × 30 mL). The combined organic layers were dried over MgSO<sub>4</sub>, filtered, and the solvent was removed by rotary evaporation. The crude material was purified by Kugelrohr distillation at 145 °C (2 mbar), lit. bp 163–169 °C (20 Hg mm) [4]. Yield: 2.10 g (90%). Pale yellow oil. <sup>1</sup>H NMR (CDCl<sub>3</sub>, 600 MHz): δ 6.68–6.65 (m, 1H), 6.65–6.60 (m, 2H), 6.48–6.45 (m, 1H), 3.48–3.46 (m, 2H), 3.27–3.25 (m, 2H), 2.68 (s, 3H) ppm. <sup>13</sup>C NMR (CDCl<sub>3</sub>, 150 MHz): δ 136.2, 134.2, 118.7, 118.2, 113.5, 111.7, 49.9, 41.3, 39.1 ppm.

**1-Methyl-4-nitroso-1,2,3,4-tetrahydroquinoxaline (27).** The solution of **26** (9.40 g, 63.42 mmol) in AcOH (70.5 mL) and H<sub>2</sub>O (47 mL) was cooled to 0–5 °C and treated dropwise with a solution of NaNO<sub>2</sub> (4.60 g, 66.67 mmol, 1.05 equiv) in H<sub>2</sub>O (47 mL) at the same temperature. After stirring for 1 h at 0–5 °C, the mixture was basified with 15% NH<sub>3</sub> solution

to pH  $\approx$  8 and extracted with CH<sub>2</sub>Cl<sub>2</sub> (3  $\times$  50 mL), dried over Na<sub>2</sub>SO<sub>4</sub>, filtered, and evaporated under reduced pressure. Yield: 11.20 g (99%). Yellow oil. IR (film, cm<sup>-1</sup>): 1605, 1503, 1425, 1306, 1170, 1131, 746. <sup>1</sup>H NMR (CDCl<sub>3</sub>, 600 MHz):  $\delta$  8.04–8.02 (m, 1H), 7.24–7.20 (m, 1H), 6.89–6.85 (m, 1H), 6.80–6.78 (m, 1H), 4.06 (t,  $J$  = 5.6 Hz, 2H), 3.22 (t,  $J$  = 5.6 Hz, 2H), 2.93 (s, 3H) ppm. <sup>13</sup>C NMR (CDCl<sub>3</sub>, 150 MHz):  $\delta$  137.2, 127.5, 126.2, 119.0, 115.7, 113.3, 48.2, 10.9, 39.1 ppm. HRMS calcd. for C<sub>9</sub>H<sub>12</sub>N<sub>3</sub>O [M+H]<sup>+</sup> 178.0975; found 178.0967.

**1-Benzylquinoxalin-1-ium bromide (28).** This compound was prepared by a published method [5]. The mixture of quinoxaline (**24**, 42.6 g, 327 mmol) and benzyl bromide (106.2 g, 73.8 mL, 621 mmol, 1.9 equiv) was left standing for 3 days. The resulting solid was filtered and washed extensively with DEE and dried. Yield: 87.1 g (88%). Yellow crystals. Mp 143–146 °C. IR (KBr, cm<sup>-1</sup>): 3424, 1604, 1511, 1358, 1154, 772, 699. <sup>1</sup>H NMR (CDCl<sub>3</sub>, 400 MHz):  $\delta$  10.73 (d,  $J$  = 2.9 Hz, 1H), 9.63 (d,  $J$  = 2.8 Hz, 1H), 8.76 (d,  $J$  = 8.8 Hz, 1H), 8.44 (dd,  $J_1$  = 1.6 Hz,  $J_2$  = 8.4 Hz, 1H), 8.20–8.16 (m, 1H), 8.13–8.08 (m, 1H), 7.61–7.58 (m, 2H), 7.33–7.31 (m, 3H), 6.91 (s, 2H) ppm. <sup>13</sup>C NMR (CDCl<sub>3</sub>, 100 MHz):  $\delta$  147.6, 146.1, 140.3, 136.3, 133.5, 132.1, 131.5, 130.1, 129.8, 129.6, 128.5, 119.7, 61.4 ppm.

**1-Benzyl-1,2,3,4-tetrahydroquinoxaline (29).** An analogous method for the *N*-methyl derivative was described by Beach and coworkers [3]. 1-Benzylquinoxalin-1-ium bromide (**28**, 30.0 g, 99.6 mmol) was dissolved in H<sub>2</sub>O (300 mL). To a solution of NaBH<sub>4</sub> (11.40 g, 301.3 mmol, 3.0 equiv) in H<sub>2</sub>O (150 mL) was added the aqueous solution of **28** over a period of 30 min at 0 °C. The mixture was stirred for further 30 min at 0 °C and then extracted with DCM (3  $\times$  60 mL). The combined organic layers were washed with H<sub>2</sub>O (2  $\times$  25 mL), dried over MgSO<sub>4</sub>, filtered, and the filtrate was concentrated under reduced pressure to afford the title compound **29**. Yield: 22.34 g (86%). Pale yellow crystals. Mp 52–53 °C (hexane, lit. mp 50.5–52.5 °C [6]). <sup>1</sup>H NMR (CDCl<sub>3</sub>, 400 MHz):  $\delta$  7.33–7.29 (m, 4H), 7.26–7.22 (m, 1H), 6.63–6.57 (m, 1H), 6.56–6.52 (m, 3H), 4.44 (s, 2H), 3.73 (br s, 1H), 3.44–3.40 (m, 4H) ppm. <sup>13</sup>C NMR

(CDCl<sub>3</sub>, 100 MHz):  $\delta$  138.7, 135.4, 133.8, 128.5, 127.0, 126.8, 119.2, 117.6, 114.1, 111.8, 55.2, 48.4, 41.0 ppm [7].

**1-Benzyl-4-(trifluoroacetyl)-1,2,3,4-tetrahydroquinoxaline (30).** To a stirred solution of amine **29** (8.60 g, 38.34 mmol) and TEA (8.0 mL, 5.81 g, 57.42 mmol, 1.5 equiv) in THF (43 mL) was carefully added TFAA (8.10 mL, 12.06 g, 57.42 mmol, 1.5 equiv) at 0 °C. The reaction mixture was stirred for 30 min at the same temperature and for further 60 min at 25 °C. The mixture was then evaporated under reduced pressure. The residue was dissolved in DCM (50 mL), washed with H<sub>2</sub>O (2  $\times$  20 mL), dried over Na<sub>2</sub>SO<sub>4</sub>, filtered, and evaporated to give the title compound **30**. Yield: 11.95 g (97%). Colorless crystals. Mp 91–92 °C (*i*PrOH). IR (KBr, cm<sup>-1</sup>): 3440, 2873, 1688, 1604, 1511, 1350, 1204, 1189, 1146, 751. <sup>1</sup>H NMR (DMSO-*d*<sub>6</sub>, 600 MHz): 7.51–7.47 (m, 1H), 7.35–7.31 (m, 2H), 7.28–7.21 (m, 3H), 7.02–6.98 (m, 1H), 6.73–6.68 (m, 1H), 6.62–6.58 (m, 1H), 4.58 (s, 2H), 3.98 (s, 2H), 3.60–3.53 (m, 2H) ppm. <sup>13</sup>C NMR (DMSO-*d*<sub>6</sub>, 150 MHz):  $\delta$  153.6 (q, *J* = 35.1 Hz), 139.2, 138.0, 128.8, 127.6, 127.1, 126.8, 124.6, 121.9, 116.6 (q, *J* = 289.2 Hz), 115.1, 112.2, 53.5, 49.4, 43.2 ppm. At room temperature, the compound consists of a ca. 9:1 mixture of two rotamers. Only the signals of the major species are given here. HRMS calcd. for C<sub>17</sub>H<sub>16</sub>F<sub>3</sub>N<sub>2</sub>O [M+H]<sup>+</sup> 321.1215; found 321.1212.

**1-(Trifluoroacetyl)-1,2,3,4-tetrahydroquinoxaline (31).** Method A: To a stirred solution of **30** (2.00 g, 6.24 mmol) in EtOAc (80 mL) were added a saturated HCl solution in EtOAc (1.0 mL) and palladium on carbon (10% Pd, 0.20 g). The reaction mixture was stirred under hydrogen atmosphere (3–5 bar) in an autoclave for 1 d. The catalyst was filtered off and the filtrate was evaporated to dryness. The waxy solid was treated with hexane (5 mL), the crystals were filtered, washed with MTBE (2  $\times$  3 mL) and dried to give title compound **30**. Yield: 1.40 g (97%). Colorless crystals. Mp 162–164 °C (MeCN). IR (KBr, cm<sup>-1</sup>): 3389, 1674, 1605, 1515, 1283, 1188, 1142, 756. <sup>1</sup>H NMR (DMSO-*d*<sub>6</sub>, 600 MHz): 7.49–7.46 (m, 1H), 7.04–6.94 (m, 1H), 6.66–6.63 (m, 1H), 6.53–6.49 (m, 1H), 6.35 (br s, 1H), 3.80 (br s, 2H), 3.42 (br s, 2H) ppm. <sup>13</sup>C

NMR (DMSO-*d*<sub>6</sub>, 150 MHz):  $\delta$  153.6 (q,  $J$  = 34.8 Hz), 139.2, 127.2, 124.4, 120.8, 116.6 (q,  $J$  = 288.9 Hz), 114.7, 114.3, 43.0, 41.6 ppm. At room temperature, the compound consists of a ca. 9:1 mixture of two rotamers. Only the signals of the major species are given here. HRMS calcd. for C<sub>10</sub>H<sub>10</sub>F<sub>3</sub>N<sub>2</sub>O [M+H]<sup>+</sup> 231.0745; found 231.0742. *Method B*: According to a published method [8], trifluoroacetic anhydride (1.30 mL, 1.94 g, 9.2 mmol) was added dropwise to a solution of 1,2,3,4-tetrahydroquinoxaline (**37**, 1.34 g, 10.0 mmol) and Et<sub>3</sub>N (1.53 mL, 1.11 g, 11.0 mmol) in CH<sub>2</sub>Cl<sub>2</sub> (10 mL) at 0 °C. After 30 min, the reaction temperature was allowed to warm to 23 °C and the mixture was stirred overnight and evaporated. The residue was separated by flash column chromatography (SiO<sub>2</sub>, hexane→hexane–EtOAc 50:50) to afford three compounds: 0.34 g (25%) of the starting material, 0.90 g (39%) of title compound **31** and 0.58 g (25%) of 1,4-bis-(trifluoroacetyl)-1,2,3,4-tetrahydroquinoxaline (**38**). For analytical data of compound **38**, see below.

**Ethyl 3-(trifluoroacetyl)-2,3,9,10-tetrahydro-1H-pyrido[3',4':4,5]pyrrolo[1,2,3-de]quinoxaline-8(7H)-carboxylate (34).** The solution of **31** (5.10 g, 22.16 mmol) in AcOH (100 mL) and H<sub>2</sub>O (50 mL) was cooled to 5–10 °C and treated dropwise with a solution of sodium nitrite (1.80 g, 26.09 mmol, 1.18 equiv) in H<sub>2</sub>O (30 mL) at the same temperature. After stirring for 1 h at 0–5 °C, the product was filtered, washed with H<sub>2</sub>O (2 × 5 mL) and dried. Yield: 4.80 g (84%). This nitroso intermediate (**32**) was directly used in the next reaction according to the procedure described in the literature for a similar reaction [1]. To a stirred solution of **32** (4.80 g, 18.52 mmol) in AcOH (80 mL) at 10–12 °C was added freshly activated zinc powder [9] (6.40 g, 97.89 mmol, 5.5 equiv) portionwise. The reaction mixture was stirred at 10–20 °C for 2 h. Ethyl 4-oxopiperidine-1-carboxylate (**5**, 2.80 mL, 3.18 g, 18.52 mmol) was added and the mixture was filtered after 5 min of stirring. The insoluble material was washed with acetic acid (4 × 16 mL). To the combined filtrates, a saturated HCl solution in DEE (0.80 mL) was added and heated to 100 °C for 1 h. The dark reaction mixture was cooled and

evaporated under reduced pressure. Flash column chromatography (SiO<sub>2</sub>, CH<sub>2</sub>Cl<sub>2</sub> → CH<sub>2</sub>Cl<sub>2</sub>/MeOH 92:8) afforded the desired product. Yield: 2.89 g (41%). Colorless crystals. Mp 126–128 °C (MeCN). IR (KBr, cm<sup>-1</sup>): 2970, 1699, 1578, 1386, 1199, 1056. <sup>1</sup>H NMR (CDCl<sub>3</sub>, 400 MHz): 7.83 (br s, 1H), 7.34–7.26 (m, 1H), 7.12–7.08 (m, 1H), 4.71 (s, 2H), 4.23–4.18 (m, 6H), 3.89 (s, 2H), 2.82 (s, 2H) 1.31 (t, *J* = 7.2 Hz, 3H) ppm. <sup>13</sup>C NMR (CDCl<sub>3</sub>, 100 MHz): δ 156.0, 154.8 (q, *J* = 35.0 Hz), 132.4, 127.3, 124.4, 122.7, 119.6, 116.3 (q, *J* = 288.3 Hz), 115.8, 114.0, 107.7, 61.6, 44.6, 41.9, 41.3, 40.9, 21.6, 14.7 ppm. At room temperature, the compound consists of a ca. 2:1 mixture of two rotamers. Only the signals of the major species are given here. HRMS calcd. for C<sub>18</sub>H<sub>19</sub>F<sub>3</sub>N<sub>3</sub>O<sub>3</sub> [M+H]<sup>+</sup> 382.1379; found 382.1372.

***cis*-Ethyl 3-(trifluoroacetyl)-2,3,6b,9,10,10a-hexahydro-1*H*-**

**pyrido[3',4':4,5]pyrrolo[1,2,3-*de*]quinoxaline-8(7*H*)-carboxylate [(±)-35].** A stirred solution of **34** (1.00 g, 2.62 mmol) in AcOH (58 mL) was cooled to 17 °C. The solution was treated portionwise with NaBH<sub>3</sub>CN (492 mg, 7.83 mmol, 3.0 equiv) and stirred at room temperature for 24 h. The reaction mixture was diluted with H<sub>2</sub>O (87 mL) and basified with 25% NH<sub>4</sub>OH (ca. 70 mL) up to pH 8. The precipitated product was filtered, washed with H<sub>2</sub>O (2 × 5 mL) and dried. Yield: 960 mg (95%). Colorless crystals. Mp 149–152 °C (*i*Pr<sub>2</sub>O, decomp.). IR (KBr, cm<sup>-1</sup>): 1685, 1202, 1186, 1142, 1121. <sup>1</sup>H NMR (DMSO-*d*<sub>6</sub>, 600 MHz): 7.86–7.84 (m, 1H), 7.01–7.00 (m, 1H), 6.66–6.63 (m, 1H), 4.08–4.06 (m, 1H), 4.04–4.01 (m, 2H), 4.00–3.97 (m, 1H), 3.87–3.77 (m, 1H), 3.67–3.64 (m, 1H), 3.54–3.46 (m, 2H), 3.28–3.24 (m, 1H), 3.22–3.17 (m, 2H), 3.07–3.04 (m, 1H), 1.86–1.79 (m, 2H), 1.17 (t, *J* = 6.7 Hz, 3H) ppm. <sup>13</sup>C NMR (DMSO-*d*<sub>6</sub>, 150 MHz): 154.9, 154.0 (q, *J* = 34.8 Hz), 142.0, 130.5, 121.9, 121.6, 120.5, 118.0, 116.4 (q, *J* = 288.5 Hz), 62.8, 60.8, 44.9, 43.9, 42.7, 40.1, 39.3, 23.6/23.5, 14.8 ppm. At room temperature, the compound consists of a ca. 1:1 mixture of two rotamers. HRMS calcd. for C<sub>18</sub>H<sub>21</sub>F<sub>3</sub>N<sub>3</sub>O<sub>3</sub> [M+H]<sup>+</sup> 384.1535; found 384.1529.



***cis*-Ethyl 2,3,6b,9,10,10a-hexahydro-1*H*-pyrido[3',4':4,5]pyrrolo[1,2,3-*de*]quinoxaline-8(7*H*)-carboxylate [(±)-**36**]** [1,2]. To a solution of (±)-**35** (500 mg, 1.30 mmol) in MeOH (20 mL) and H<sub>2</sub>O (0.8 mL) was added K<sub>2</sub>CO<sub>3</sub> (0.36 g, 2.61 mmol, 2.0 equiv). The reaction mixture was stirred at reflux temperature for 2 h and evaporated. The residue was dissolved in the mixture of EtOAc (20 mL) and H<sub>2</sub>O (20 mL). After separation, the aqueous phase was extracted with EtOAc (2 × 20 mL). The combined organic layers were washed with brine (20 mL), dried over MgSO<sub>4</sub>, filtered, and evaporated under reduced pressure to provide the product. Yield: 334 mg (89%). Off-white crystals. Mp 122–125 °C (hexane). IR (KBr, cm<sup>-1</sup>): 3342, 1678, 1483, 1440, 1122, 730. <sup>1</sup>H NMR (CDCl<sub>3</sub>, 600 MHz): 6.61–6.59 (m, 1H), 6.58–6.56 (m, 1H), 6.41–6.39 (m, 1H), 4.20–4.11 (m, 2H), 4.16/4.05–3.98 (m, 1H), 3.94–3.88/3.88–3.83 (m, 1H), 3.72–3.67 (m, 1H), 3.60 (br s, 1H), 3.51–3.47 (m, 1H), 3.36–3.34 (m, 1H), 3.33–3.31 (m, 1H), 3.22–3.15 (m, 1H), 3.14–3.07 (m, 1H), 2.92–2.86/2.86–2.78 (m, 1H), 2.72–2.67 (m, 1H), 1.95–1.90 (m, 1H), 1.89–1.82 (m, 1H), 1.28 (t, *J* = 7.1 Hz, 3H) ppm. <sup>13</sup>C NMR (CDCl<sub>3</sub>, 150 MHz): δ 155.5, 138.0, 132.5, 129.7 (br), 120.3, 113.6 (br), 111.9, 65.3, 61.2, 45.6, 44.2, 42.3, 41.0/40.8, 39.7, 24.7/24.4, 14.7 ppm. At room temperature, the compound consists of a ca. 1:1 mixture of two rotamers.

**1,4-Bis(trifluoroacetyl)-1,2,3,4-tetrahydroquinoxaline (**38**)**. This compound was obtained as a byproduct in the synthesis of compound **31** (see above). Colorless crystals. Mp 121–122.5 °C (EtOH, lit. mp 118–118.5 °C [10]). IR (KBr, cm<sup>-1</sup>): 1689, 1505, 1206, 1185, 1140, 529. <sup>1</sup>H NMR (CDCl<sub>3</sub>, 600 MHz): 8.00–7.60 (m, 1H), 7.60–7.30 (m, 3H), 4.18–4.02 (m, 4H) ppm. <sup>13</sup>C NMR (CDCl<sub>3</sub>, 150 MHz): δ 156.0, 133.6/128.6, 128.6/127.2, 124.7, 116.0 (q, *J* = 288.4 Hz), 45.7 ppm. At room temperature, the compound consists of a ca. 1:1 mixture of two rotamers.

***cis*-Ethyl 3-methyl-2,3,6b,9,10,10a-hexahydro-1*H*-pyrido[3',4':4,5]pyrrolo[1,2,3-*de*]quinoxaline-8(7*H*)-carboxylate [(±)-**9**]**. To a solution of (±)-**36** (320 mg, 1.11 mmol) in MeCN (26 mL) was added formaldehyde (0.83 mL of a 37% aqueous solution, 11.12 mmol,

10 equiv). After 20 min, to the dark orange reaction mixture were added  $\text{NaBH}_3\text{CN}$  (176 mg, 2.80 mmol, 2.5 equiv) and  $\text{AcOH}$  (160  $\mu\text{L}$ , 168 mg, 2.80 mmol, 2.5 equiv) and the mixture was stirred at room temperature for 2 h. The solvents were evaporated, and the residue was taken up in DCM (20 mL) and extracted with saturated  $\text{NaHCO}_3$  ( $2 \times 15$  mL), dried over  $\text{MgSO}_4$ , filtered, and concentrated under reduced pressure to give the product. Yield: 232 mg (69%). Colorless oil.  $^1\text{H}$  NMR ( $\text{CDCl}_3$ , 600 MHz): 6.68–6.65 (m, 1H), 6.56–6.54 (m, 1H), 6.42–6.41 (m, 1H), 4.17–4.13 (m, 2H), 4.04–3.98 (m, 1H), 3.93–3.81 (m, 1H), 3.62–3.58 (m, 1H), 3.35–3.32 (m, 2H), 3.30–3.26 (m, 1H), 3.19–3.11 (m, 2H), 2.87 (s, 3H), 2.86–2.84 (m, 1H), 2.82–2.78 (m, 1H), 1.92–1.82 (m, 2H) 1.28 (t, 3H,  $J = 7.2$  Hz) ppm.  $^{13}\text{C}$  NMR ( $\text{CDCl}_3$ , 150 MHz):  $\delta$  155.5, 138.0, 135.0, 128.6 (br), 120.4, 112.9 (br), 109.1, 64.9, 61.2, 50.5, 45.6, 44.2, 41.3/41.0, 39.7, 37.5, 24.6/24.3, 14.7 ppm. At room temperature, the compound consists of a ca. 1:1 mixture of two rotamers.

## References

1. Robichaud, A. J.; Lee, T.; Deng, W.; Mitchell, I. S.; Yang, M. G.; Haydar, S.; Chen, W.; MC Clung, Ch. D.; Calvello, E. J. B.; Zawrotny, D. M. Preparation of substituted heterocycle fused gamma-carbolines. WO Patent 2000077002, December 21, 2000.
2. Li, P.; Zhang, Q.; Robichaud, A. J.; Lee, T.; Tomesch, J.; Yao, W.; Beard, J. D.; Snyder, G. L.; Zhu, H.; Peng, Y.; Hendrick, J. P.; Vanover, K. E.; Davis, R. E.; Mates, S.; Wennogle, L. *P. J. Med. Chem.* **2014**, *57*, 2670–2682. doi: 10.1021/jm401958n
3. Smith, R. F.; Rebel, W. J.; Beach, T. N. *J. Org. Chem.* **1959**, *24*, 205–207. doi: 10.1021/jo01084a014
4. Process for preparation of 1-(4-fluorophenyl)-4-((6b*R*,10a*S*)-3-methyl-2,3,6b,9,10,10a-hexahydro-1*H*-pyrido[3',4':4,5]pyrrolo[1,2,3-*de*]quinoxalin-8(7*H*)-yl)butan-1-one. IPCOM000258304D; *Chem. Abstr.* **2019**, *171*, 163843.
5. Leblanc, N.; Sproules, S.; Powell, A. K. *New J. Chem.* **2017**, *41*, 2949–2954. doi: 10.1039/C7NJ00531H
6. Cavagnol, J. C.; Wiselogle, F. Y. *J. Am. Chem. Soc.* **1947**, *69*, 795–799. doi: 10.1021/ja01196a015
7. Ogata, O.; Nara, H.; Matsumara, K.; Kayaki, Y. *Org. Lett.* **2019**, *10*, 9954–9959. doi: 10.1021/acs.orglett.9b03878
8. Murphy, B. P.; Zhang, G.; Zhao, J. Stable violet-blue to blue imidazolium compounds. WO Patent 2018052725, March 22, 2018.
9. Furniss, B. S.; Hannaford, A. J.; Smith, P. W. G.; Tatchell, A. R. *Vogel's Textbook of Practical Organic Chemistry*, 5th ed.; Longman, Harlow, UK, 1989; pp 467.
10. De Selms, R. C.; Greaves, R. J.; Schleigh, W. R. *J. Heterocycl. Chem.* **1974**, *11*, 595–597. doi: 10.1002/jhet.5570110425

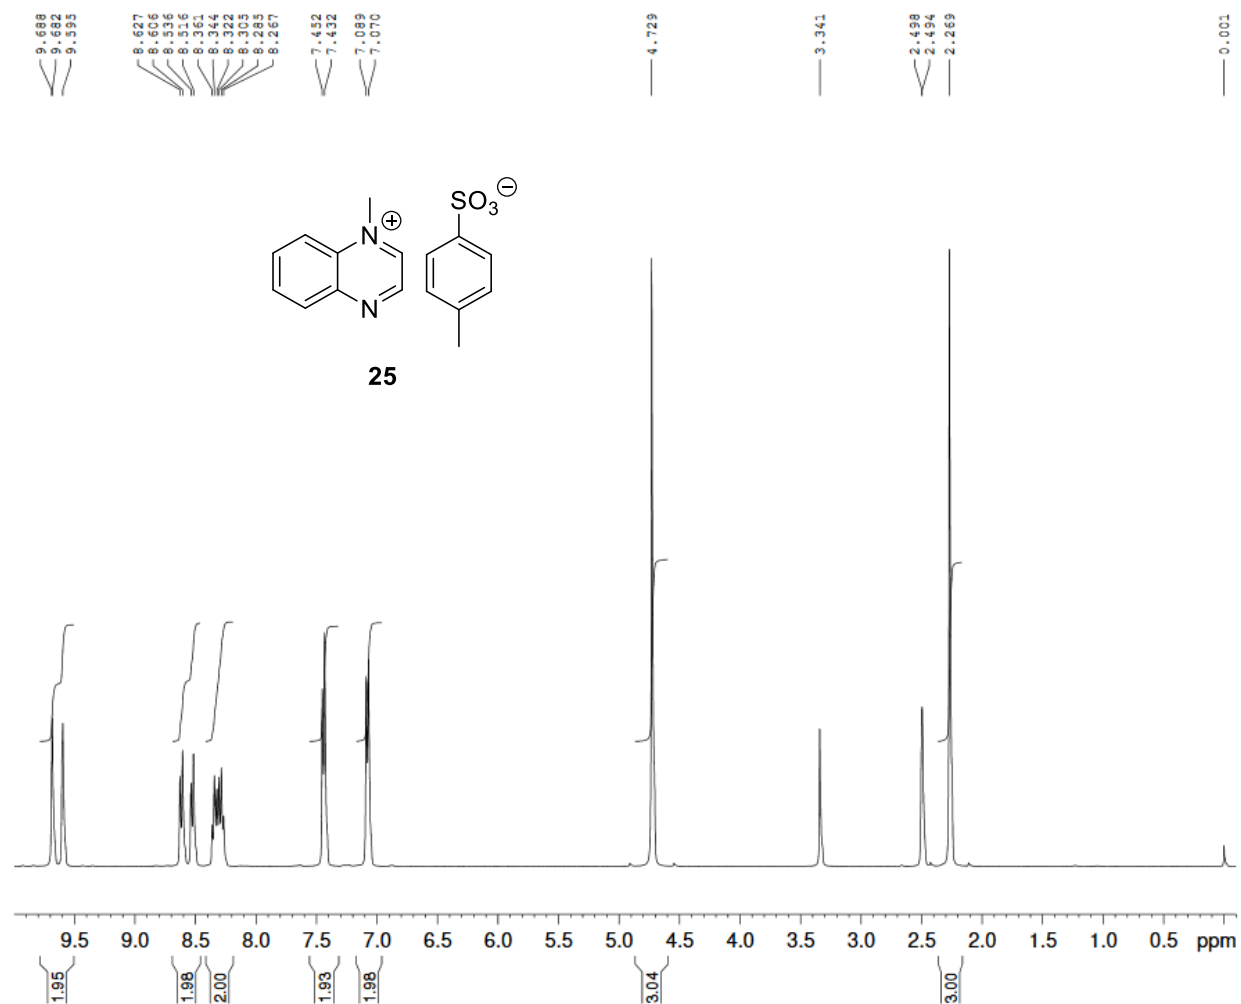

Standard 1H  
121202  
MIM0341\_1  
Milen Matyas  
2017.02.21. (DA)

```

NAME          121202
EXPNO          1
PROCNO         1
Date_         20170222
Time           15.14
INSTRUM        spect
PROBHD         5 mm PABBO BB-
PULPROG        zg30
ID             65536
SOLVENT        DMSO
NS             64
DS             2
SWH            8223.685 Hz
FIDRES         0.125483 Hz
AQ            3.9846387 sec
RG             80.6
DW            60.800 usec
DE             6.50 usec
TE            296.4 K
D1            1.00000000 sec
TD0            1

===== CHANNEL f1 =====
NUC1           1H
P1            12.50 usec
PL1           0.80 dB
PL1W          12.53577709 W
SFO1          400.1324710 MHz
SI            32768
SF            400.1300052 MHz
WDW           no
SSB           0
LB            0.00 Hz
GB            0
PC            1.00

```

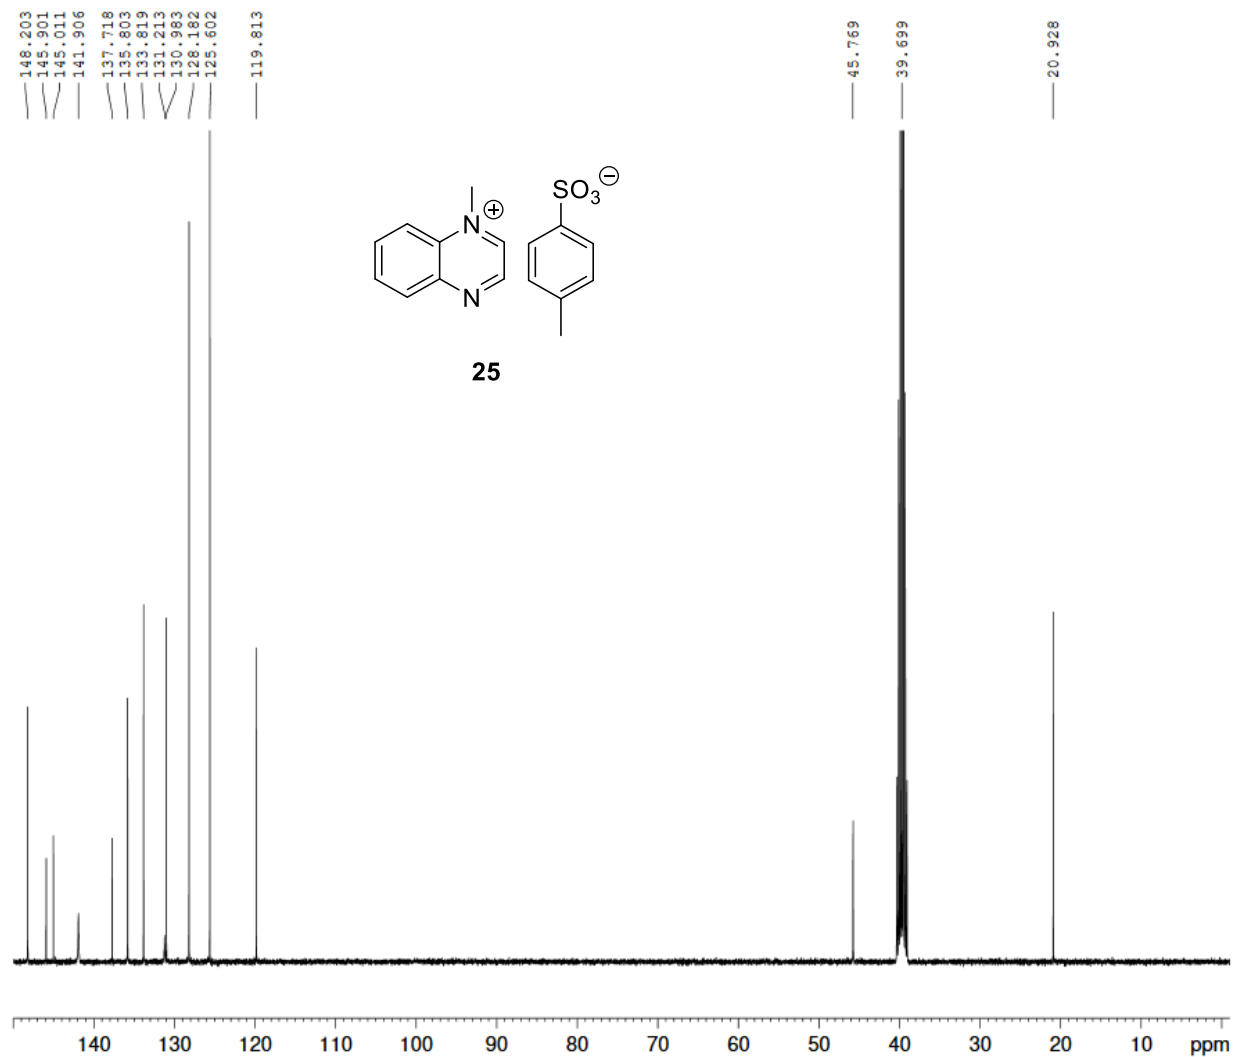

Standard 13C  
121202  
MIM0341\_1  
Milen Matyas  
2017.02.21. (DA)

NAME 121202  
EXPNO 2  
PROCNO 1  
Date\_ 20170223  
Time 2.16  
INSTRUM spect  
PROBHD 5 mm PABBO BB-  
PULPROG zgpg30  
TD 65536  
SOLVENT DMSO  
NS 16384  
DS 4  
SWH 24038.461 Hz  
FIDRES 0.366798 Hz  
AQ 1.3631988 sec  
RG 2050  
DW 20.800 usec  
DE 6.50 usec  
TE 296.8 K  
D1 1.00000000 sec  
D11 0.03000000 sec  
TD0 1

CHANNEL f1  
NUC1 13C  
P1 9.50 usec  
PL1 1.44 dB  
PL1W 43.99363327 W  
SFO1 100.6228298 MHz

CHANNEL f2  
CPDPRG2 waltz16  
NUC2 1H  
PCPD2 90.00 usec  
PL2 0.80 dB  
PL12 18.30 dB  
PL13 18.40 dB  
PL2W 12.53577709 W  
PL12W 0.22292118 W  
PL13W 0.21784686 W  
SFO2 400.1316005 MHz  
S1 32768  
SF 100.6128002 MHz  
WDW no  
SSB 0  
LB 0.00 Hz  
GB 0  
PC 1.40

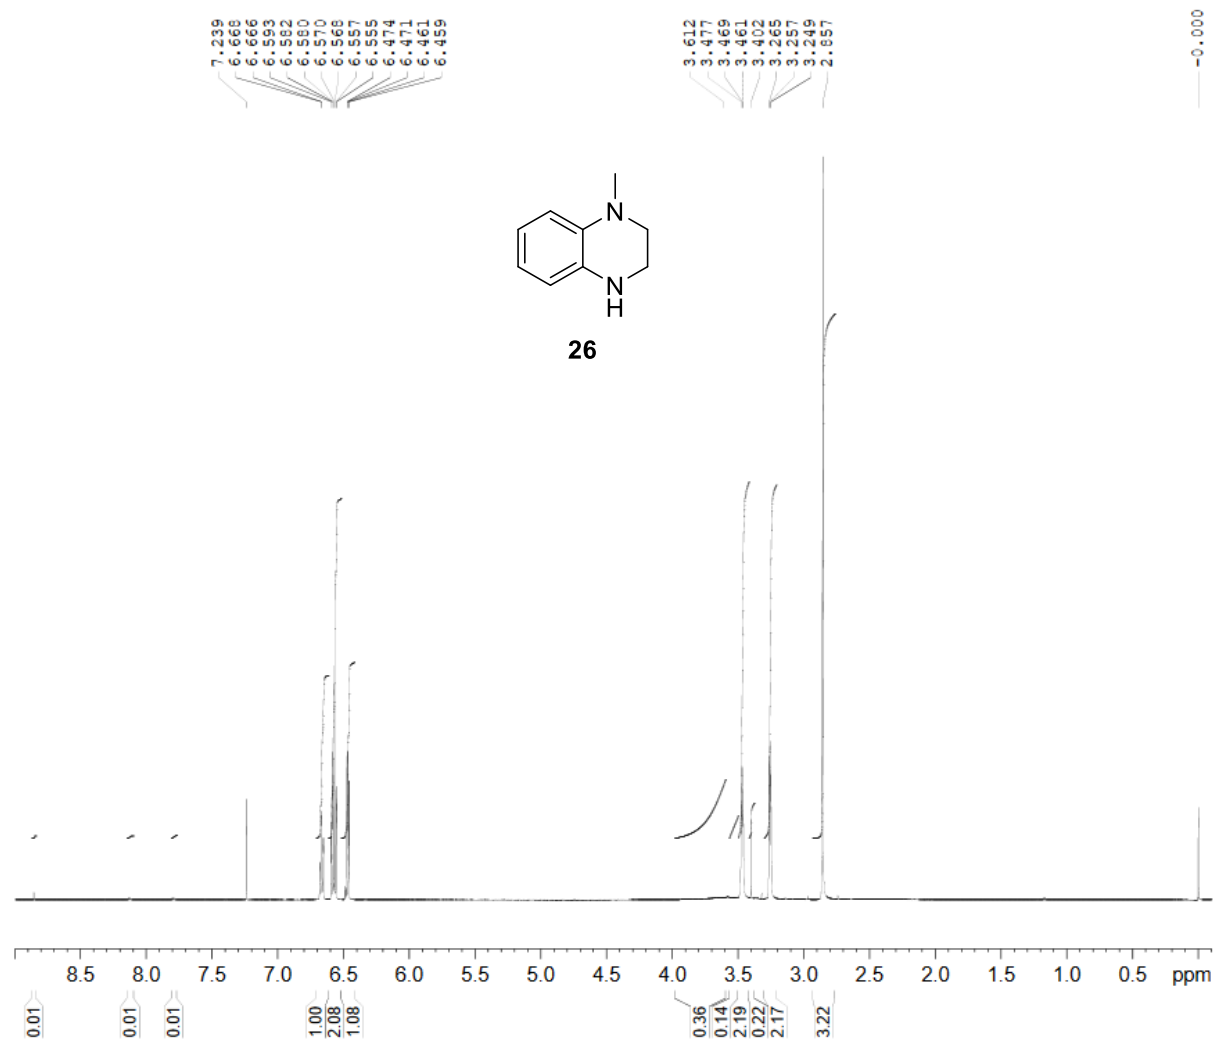

Standard 1H  
121210  
MIM0343\_1  
Milan Matyas  
2017.02.22. (DA)

Current Data Parameters  
NAME 121210  
EXPNO 11  
PROCNO 1

F2 - Acquisition Parameters  
Date\_ 20170223  
Time 1.59  
INSTRUM spect  
PROBHD 5 mm CPPBBO BB  
PULPROG zg30  
TD 65536  
SOLVENT CDCl3  
NS 16  
DS 4  
SWH 12626.263 Hz  
FIDRES 0.192661 Hz  
AQ 2.5952256 sec  
RG 89.22  
DW 39.600 usec  
DE 25.00 usec  
TE 295.0 K  
D1 1.00000000 sec  
TD0 1

===== CHANNEL f1 =====  
SFO1 600.1642011 MHz  
NUC1 1H  
P1 11.50 usec  
PLW1 28.00000000 W

F2 - Processing parameters  
SI 65536  
SF 600.1600263 MHz  
WDW no  
SSB 0  
LB 0 Hz  
GB 0  
PC 1.00

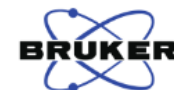

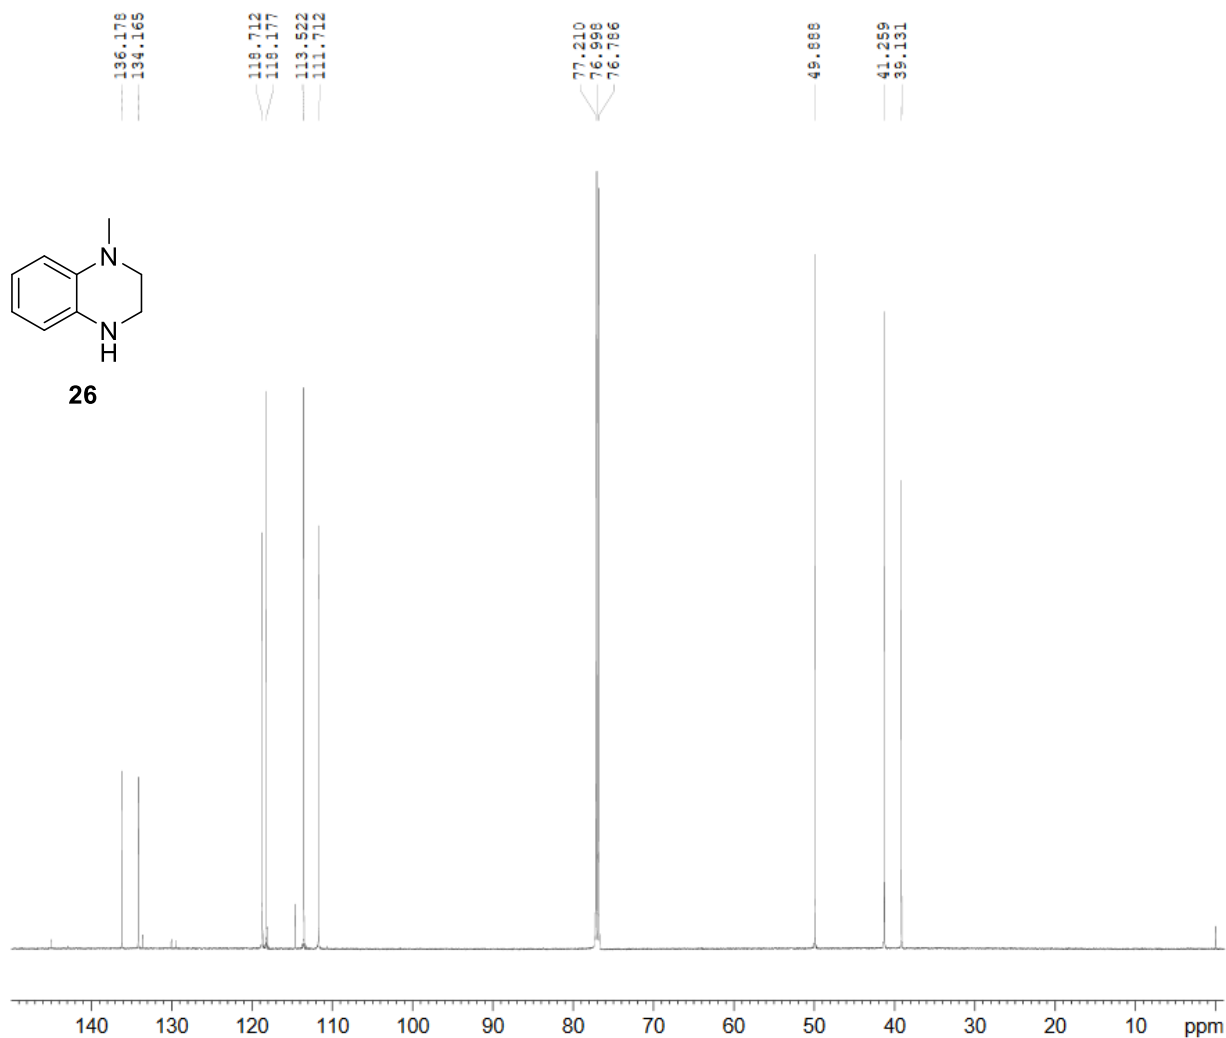

Standard 13C  
121210  
MIM0343\_1  
Milen Matyas  
2017.02.22. (DA)

Current Data Parameters  
NAME 121210  
EXPNO 12  
PROCNO 1

F2 - Acquisition Parameters  
Date\_ 20170223  
Time 2.43  
INSTRUM spect  
PROBHD 5 mm CPPBBO BB  
PULPROG zgpg30  
TD 65536  
SOLVENT CDCl3  
NS 1024  
DS 4  
SWH 36057.691 Hz  
FIDRES 0.550197 Hz  
AQ 0.9087659 sec  
RG 196.07  
DW 13.867 usec  
DE 18.00 usec  
TE 295.0 K  
D1 1.50000000 sec  
D11 0.03000000 sec  
TD0 1

===== CHANNEL f1 =====  
SFO1 150.9254424 MHz  
NUC1 13C  
P1 10.00 usec  
PLW1 65.00000000 W

===== CHANNEL f2 =====  
SFO2 600.1624006 MHz  
NUC2 1H  
CPDPRG2 waltz16  
PCPD2 70.00 usec  
PLW2 28.00000000 W  
PLW12 0.75571001 W  
PLW13 0.37029999 W

F2 - Processing parameters  
SI 65536  
SF 150.9103658 MHz  
WDW EM  
SSB 0  
LB 1.00 Hz  
GB 0  
PC 1.40

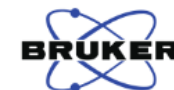

|                  |              |             |                     |
|------------------|--------------|-------------|---------------------|
| <b>135068</b>    | Milen Matyas | KP          | BRUKER Alpha        |
| <b>MIM0353_1</b> | Film         | 2020.10.28. | Resolution: 2 cm-1  |
|                  |              |             | Number of Scans: 16 |

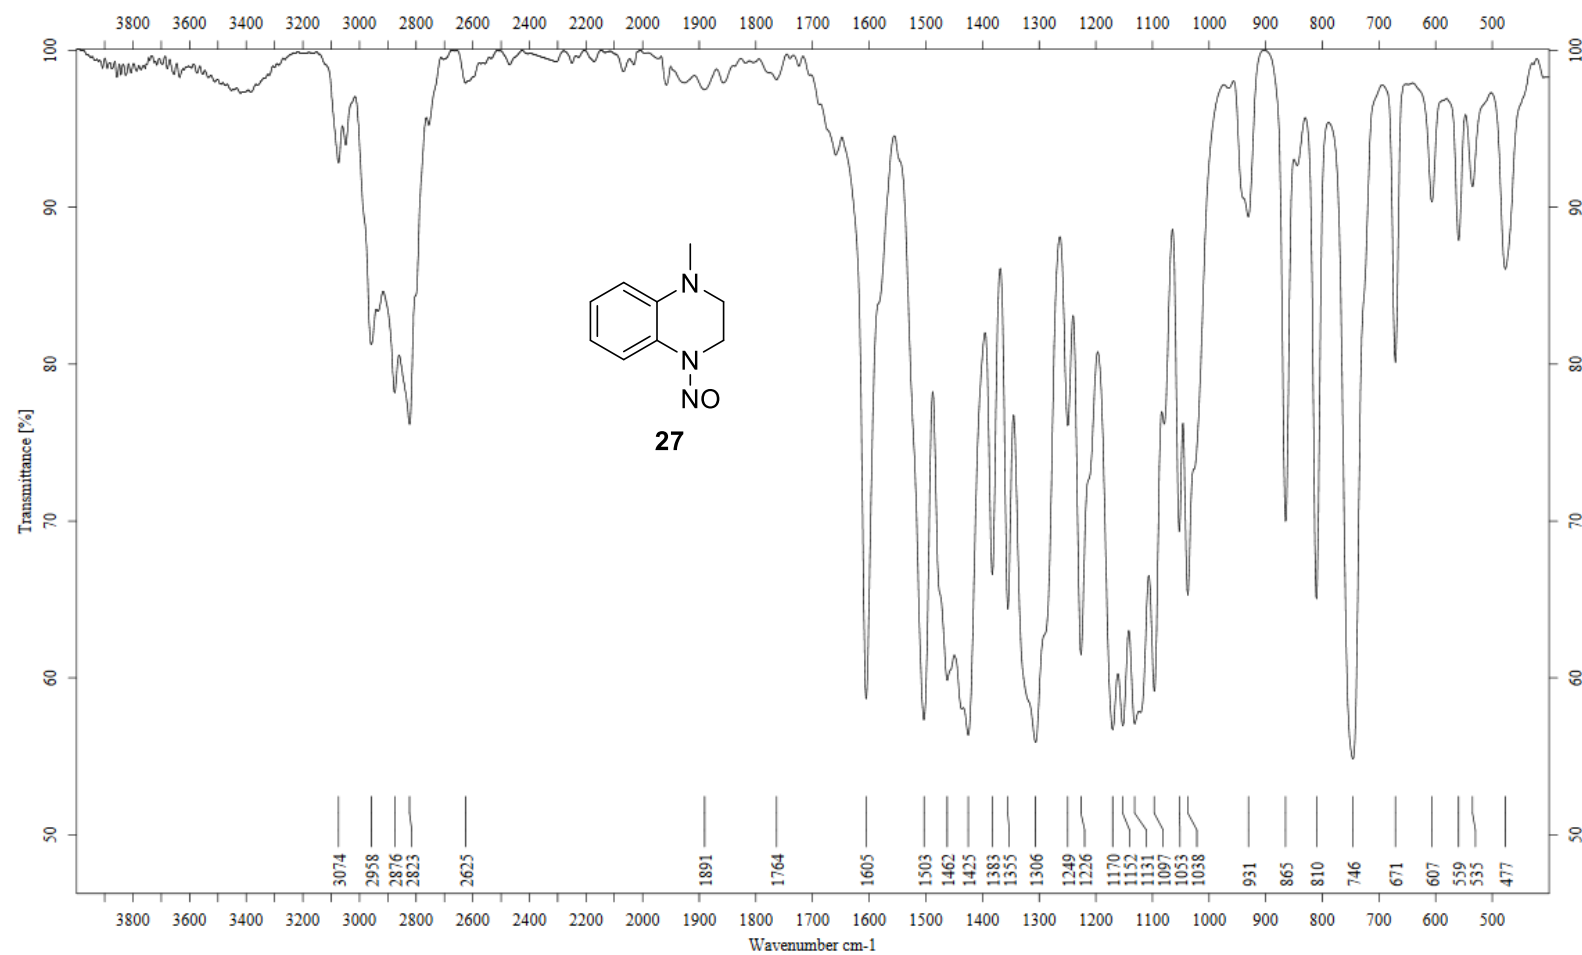



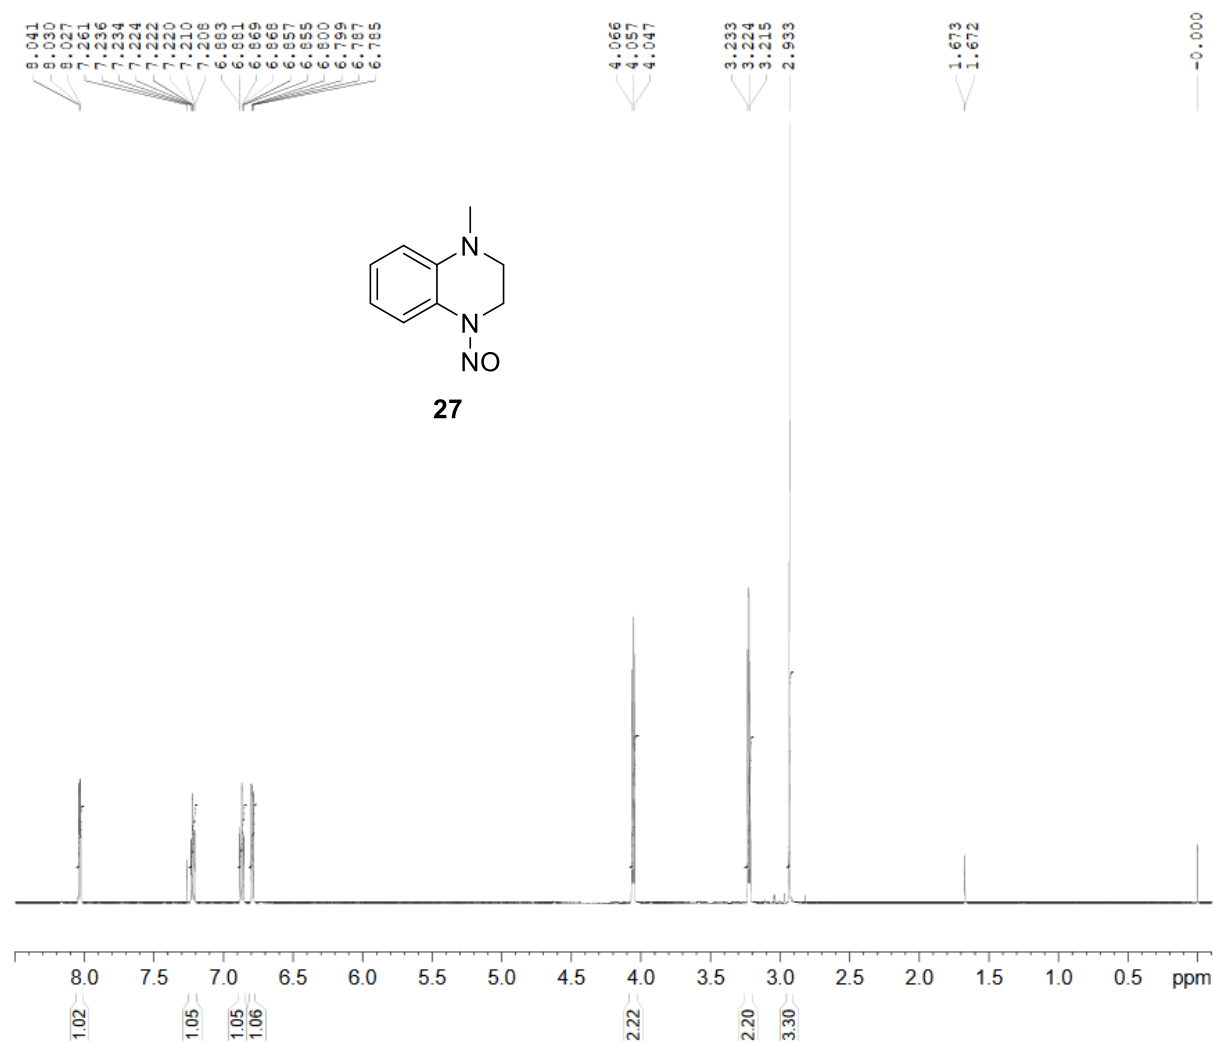

Standard 1H  
135068  
MIM0353\_1  
Milen Matyas  
2020.10.28. (KP)

Current Data Parameters  
NAME 135068  
EXPNO 11  
PROCNO 1

F2 - Acquisition Parameters  
Date\_ 20201028  
Time 19.38 h  
INSTRUM spect  
PROBHD Z145856\_0002 (   
PULPROG zg30  
TD 65536  
SOLVENT CDCl3  
NS 16  
DS 2  
SWH 12019.230 Hz  
FIDRES 0.366798 Hz  
AQ 2.7262976 sec  
RG 89.22  
DW 41.600 usec  
DE 25.00 usec  
TE 295.0 K  
D1 1.00000000 sec  
TD0 1  
SFO1 600.1037056 MHz  
NUC1 1H  
P1 11.50 usec  
PLW1 28.00000000 W

F2 - Processing parameters  
SI 65536  
SF 600.1000142 MHz  
WDW no  
SSB 0  
LB 0 Hz  
GB 0  
PC 1.00

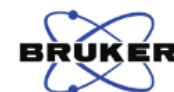

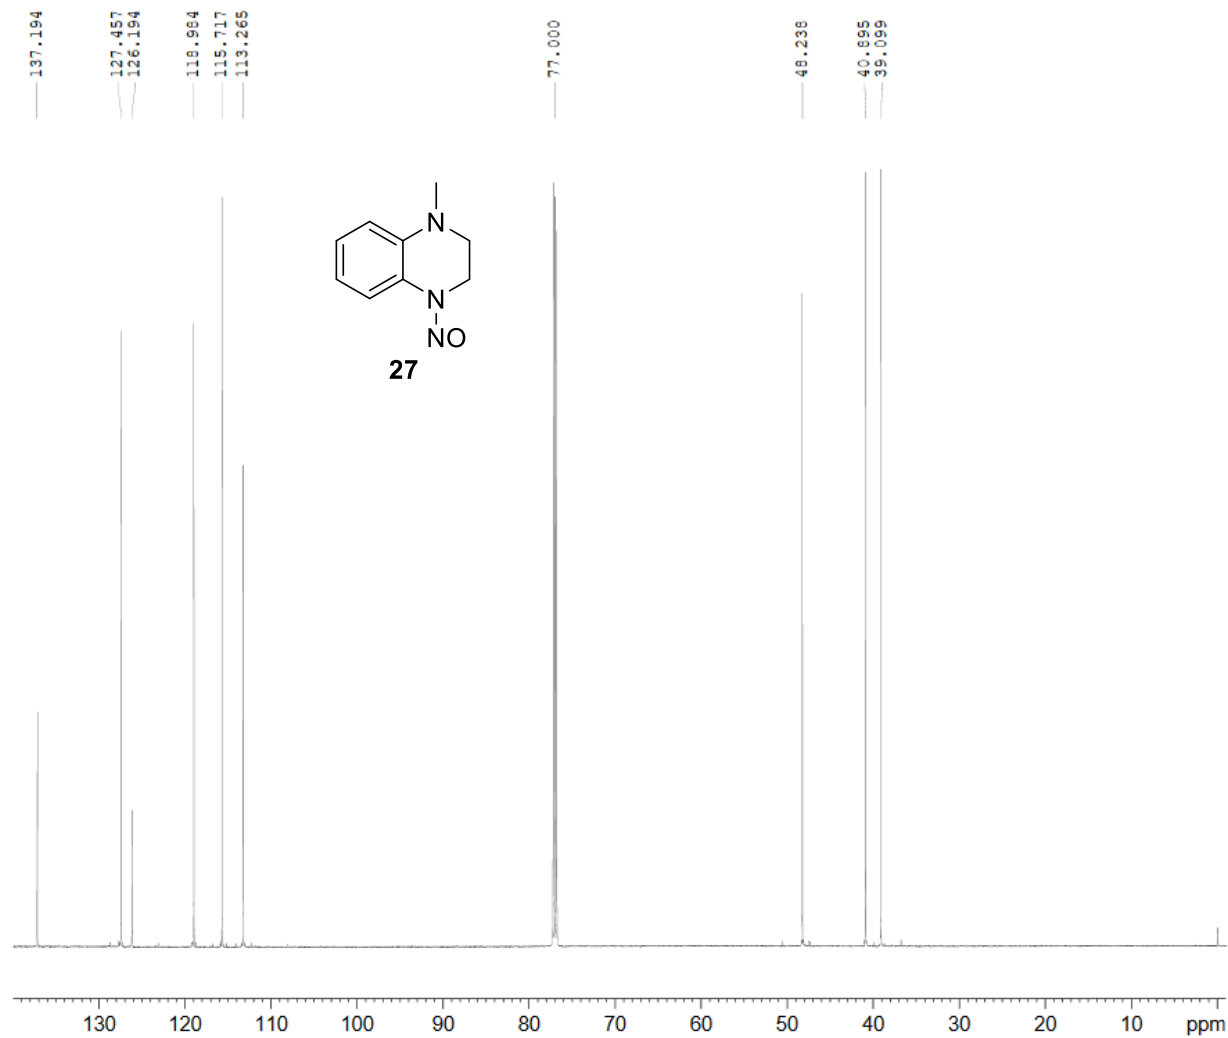

Standard 13C  
135068  
MIM0353\_1  
Milen Matyas  
2020.10.28. (KP)

Current Data Parameters  
NAME 135068  
EXPNO 12  
PROCNO 1

F2 - Acquisition Parameters  
Date\_ 20201028  
Time\_ 20.48 h  
INSTRUM spect  
PROBHD Z145856\_0002 (Z145856)  
PULPROG zgpg30  
TD 65536  
SOLVENT CDC13  
NS 2048  
DS 4  
SWH 36231.883 Hz  
FIDRES 1.105709 Hz  
AQ 0.9043968 sec  
RG 196.07  
DW 13.800 usec  
DE 18.00 usec  
TE 295.0 K  
D1 1.00000000 sec  
D11 0.03000000 sec  
TD0 1  
SFO1 150.9103545 MHz  
NUC1 13C  
P1 10.00 usec  
PLW1 63.09999847 W  
SFO2 600.1024004 MHz  
NUC2 1H  
CPDPRG[2] waltz16  
PCPD2 80.00 usec  
PLW2 30.48800087 W  
PLW12 0.63000000 W  
PLW13 0.31637999 W

F2 - Processing parameters  
SI 32768  
SF 150.8952779 MHz  
WDW EM  
SSB 0  
LB 1.00 Hz  
GB 0  
PC 1.40

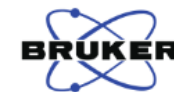

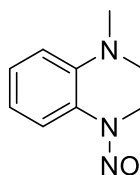

27

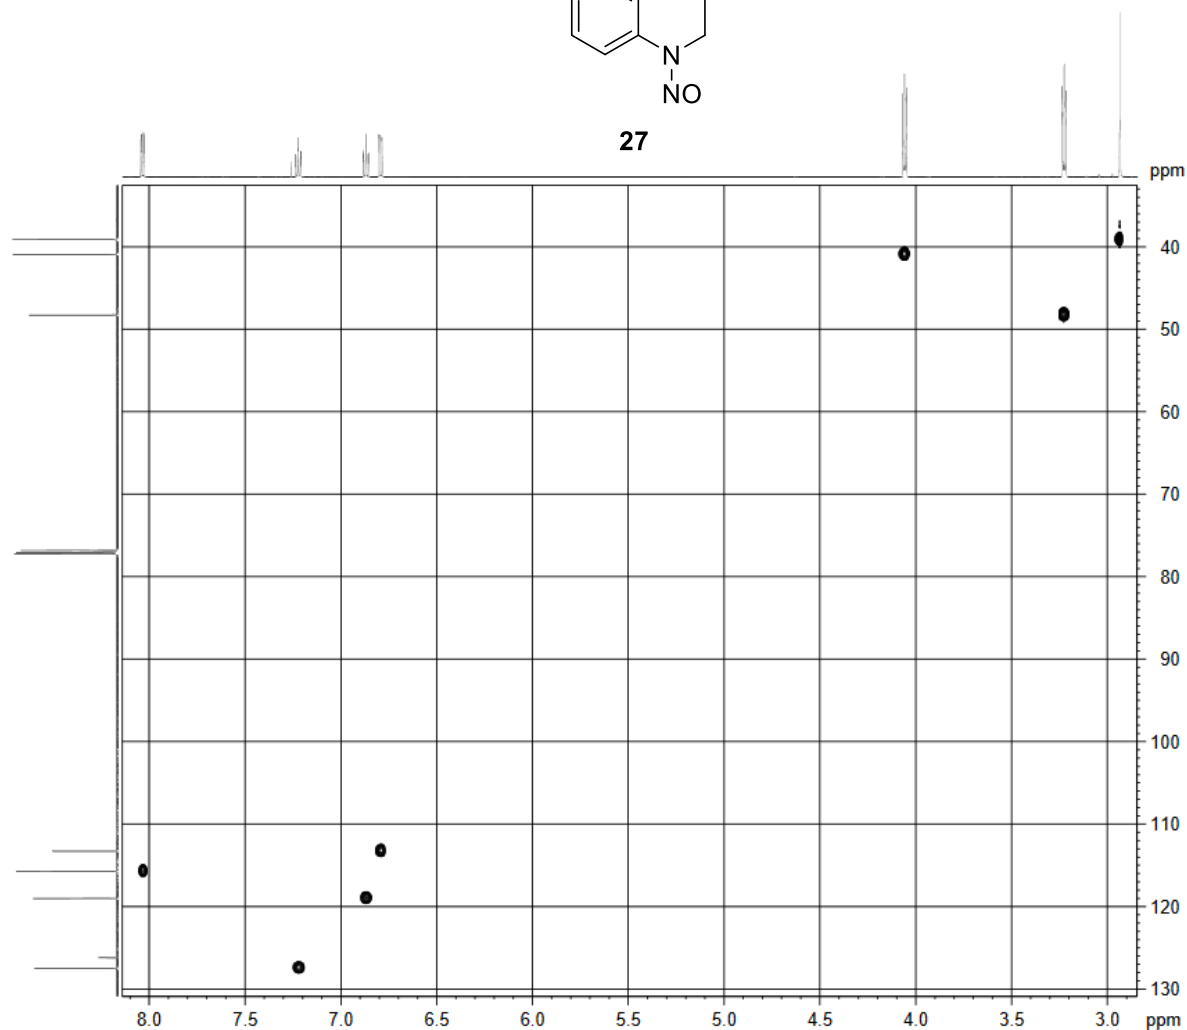

HSQC (140Hz)  
135068  
MIM0353\_1  
Milen Matyas  
2020.10.28. (KP)

Current Data Parameters  
NAME 135068  
EXPNO 13  
PROCNO 1

F2 - Acquisition Parameters  
Date\_ 20201028  
Time 20.30 h  
INSTRUM spect  
PROBHD Z145558\_0002 (PULPROG zgpg30)  
TD 2648  
SOLVENT CDCl3  
NS 2  
DS 32  
SWH 7812.500 Hz  
FIDRES 0.000000 Hz  
AQ 0.1310720 sec  
RG 128.00  
SH 64.000 usec  
SE 25.00 usec  
TE 298.0 K  
CHST2 140.0000000  
CHST17 -0.5000000  
DO 0.0000000 sec  
D1 1.5000000 sec  
D4 0.00178971 sec  
D11 0.0000000 sec  
D16 0.0000000 sec  
D24 0.0000000 sec  
LPC 0.0001110 sec  
TD0V 1  
SFO1 500.1309007 MHz  
NUC1 13C  
P1 15.00 usec  
P2 25.00 usec  
P25 0 usec  
PLH1 25.0000000 W  
SFO2 100.618055 MHz  
NUC2 13C  
CPCP2512 hf\_g2m4ap\_4ap.2  
P3 10.00 usec  
P14 500.00 usec  
P14 2000.00 usec  
P43 1500.00 usec  
PLH2 0 W  
PLH2 83.09899947 W  
PLH12 2.08589997 W  
SFOH(15) Csp42, 0.5, 20.1  
SFOAL5 0.500  
SFOFF53 0 Hz  
SFOH2 8.64099979 W  
SFOH(17) Csp42comp, 4  
SFOAL7 0.500  
SFOFF57 0 Hz  
SFOH7 8.64099979 W  
SFOH(14) Csp42, 1.5, 20.2  
SFOAL14 0.500  
SFOFF514 0 Hz  
SFOH14 5.39900017 W  
SFOH(13) Csp42, 1.5, 20.2  
SFOAL13 0.500  
SFOFF531 0 Hz  
SFOH1 1.34989997 W  
SFOH(11) SNOQ10.100  
SFOH(2) SNOQ10.100  
SFOH(3) SNOQ10.100  
SFOH(4) SNOQ10.100  
SFOH(5) SNOQ10.100  
P16 1000.00 usec  
P19 600.00 usec

F1 - Acquisition parameters  
TD 256  
SFO1 100.618055 MHz  
FIDRES 258.692047 Hz  
SW 218.417 ppm  
F2MODE Echo-AntiEcho

F2 - Processing parameters  
SI 1024  
SF 500.1309007 MHz  
WDW GSSM

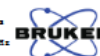

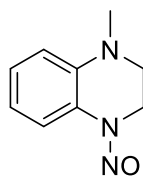

27

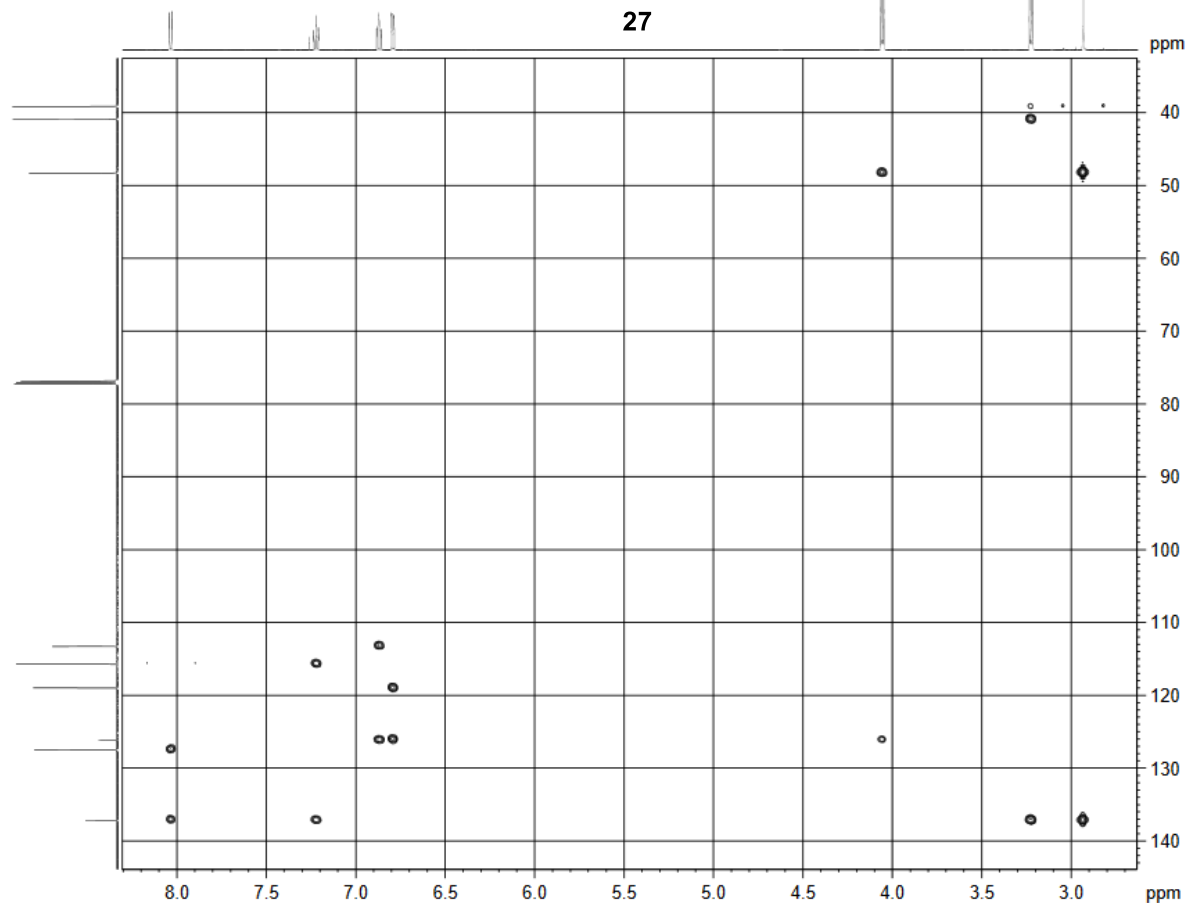

HMBC (8 Hz, 140Hz)  
135068  
MIM0353\_1  
Milen Matyas  
2020.10.28. (KP)

Current Data Parameters  
NAME 135068  
EXPNO 14  
PROCNO 1  
F2 - Acquisition Parameters  
Date\_ 20201028  
Time 11.08 h  
INSTRUM spect  
PROBHD 1H45558\_0002 (1  
PULPROG hmcpgp1000g  
TD 2048  
SOLVENT CDCl3  
NS 4  
DS 16  
SWH 7812.500 Hz  
FIDRES 7.628950 Hz  
AQ 0.1310720 sec  
RG 198.07  
SM 64.000 usec  
DE 25.00 usec  
TE 298.0 K  
CHST2 140.0000000  
CHST13 8.0000000  
DO 0.0000000 sec  
D1 1.80000000 sec  
D2 0.00000000 sec  
D6 0.00000000 sec  
D16 0.00000000 sec  
TDS 1  
SFO1 600.1039007 MHz  
NUC1 1H  
P1 11.00 usec  
P2 25.00 usec  
PLN1 28.00000000 W  
SFO2 150.9119635 MHz  
NUC2 13C  
P3 10.00 usec  
PLN2 63.09899847 W  
SFRAN(1) SFRQ10.100  
SFR1 80.00 a  
SFRAN(2) SFRQ10.100  
SFR2 80.00 a  
SFRAN(3) SFRQ10.100  
SFR3 40.10 a  
SFR 1000.00 usec  
F1 - Acquisition parameters  
TD 2048  
SFO1 150.9119 MHz  
FIDRES 258.692047 Hz  
SM 218.417 ppm  
F2MODE QF  
F2 - Processing parameters  
SI 2048  
SF 600.100142 MHz  
WDW SINE  
SSB 0  
LB 0 Hz  
GB 0  
PC 1.40  
F1 - Processing parameters  
SI 1024  
VC2 QF  
SF 150.9952779 MHz  
WDW SINE  
SSB 0  
LB 0 Hz  
GB 0

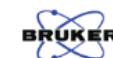

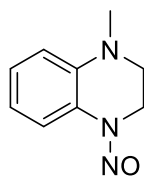

27

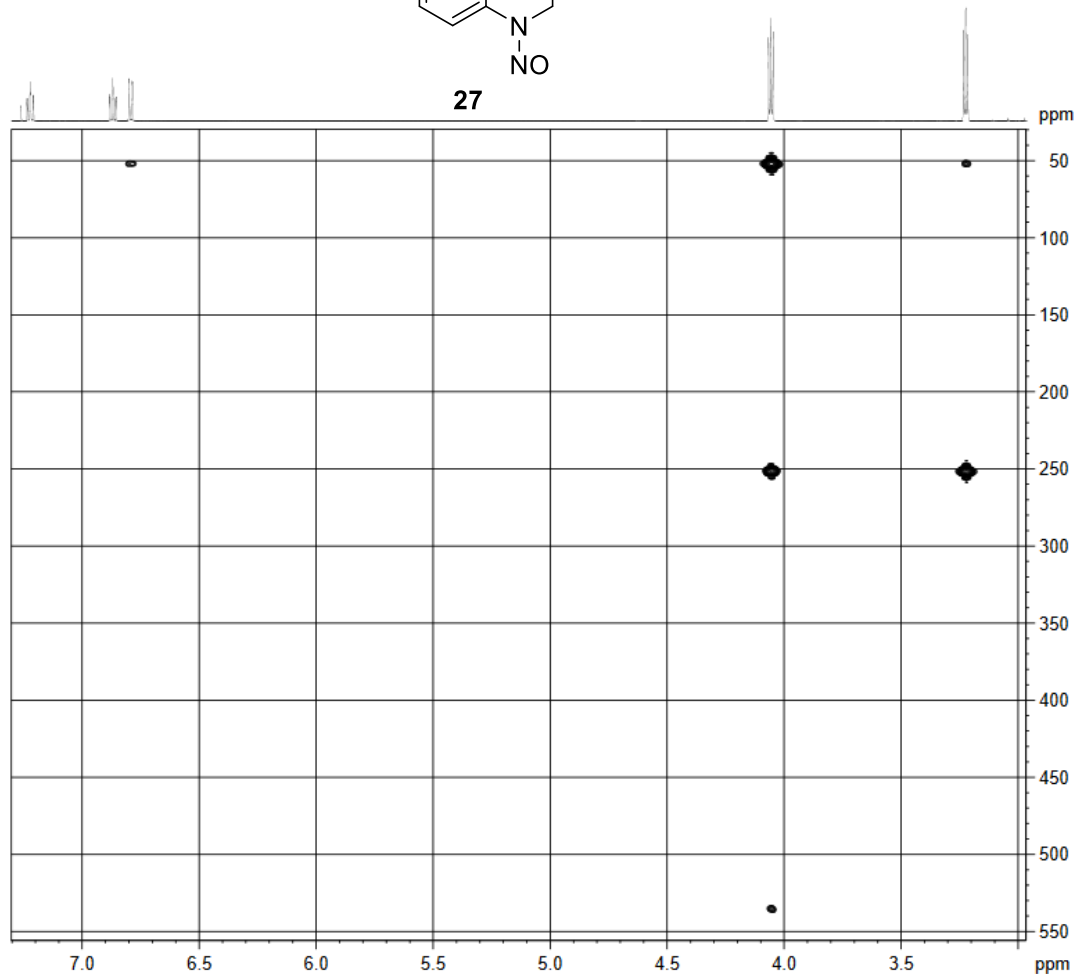

NHMB (5 Hz)  
135068  
MIM0353\_1  
Milen Matyas  
2020.10.28. (KP)

Current Data Parameters  
NAME 135068  
EXPNO 15  
PROCNO 1

F2 - Acquisition Parameters  
Date\_ 20201028  
Time 11.38 h  
INSTRUM spect  
PROBHD Z145558\_0002 (hmbgpmag)  
TD 2048  
SOLVENT CDCl3  
NS 16  
DS 16  
SWH 9619.355 Hz  
FIDRES 0.390024 Hz  
AQ 0.1084980 sec  
RG 198.07  
SW 22.000 usec  
DE 25.00 usec  
TE 299.0 K  
CHST13 5.0000000  
DO 0.0000000 sec  
D1 2.0000000 sec  
DE 0.1000000 sec  
D16 0.0020000 sec  
LSD 0.00001370 sec  
TDav 1  
SF01 600.1045008 MHz  
NUC1 13  
P1 11.50 usec  
P2 25.00 usec  
PLH1 28.0000000 W  
SF02 60.8259472 MHz  
NUC2 15N  
P3 15.00 usec  
PLH2 199.69000244 W  
SFRAM(1) SHSQ10.100  
SF11 70.00 Hz  
SFRAM(2) SHSQ10.100  
SF12 30.00 Hz  
SFRAM(3) SHSQ10.100  
SF13 30.10 Hz  
P16 1000.00 usec

F1 - Acquisition parameters  
TD 128  
SF01 60.82595 MHz  
FIDRES 0.7020480 Hz  
SW 600.014 ppm  
F0MODE QF

F2 - Processing parameters  
SI 2048  
SF 600.1000142 MHz  
WDW HANN  
SSB 0  
LB 0 Hz  
GB 0  
PC 1.40

F1 - Processing parameters  
SI 1024  
MC2 QF  
SF 60.8076049 MHz  
WDW HANN  
SSB 0  
LB 0 Hz  
GB 0

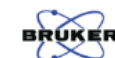

**125082**  
**JET0039\_1**

|              |             |
|--------------|-------------|
| Milen Matyas | KP          |
| KBr          | 2018.03.08. |

|                     |
|---------------------|
| BRUKER Alpha        |
| Resolution: 2 cm-1  |
| Number of Scans: 16 |

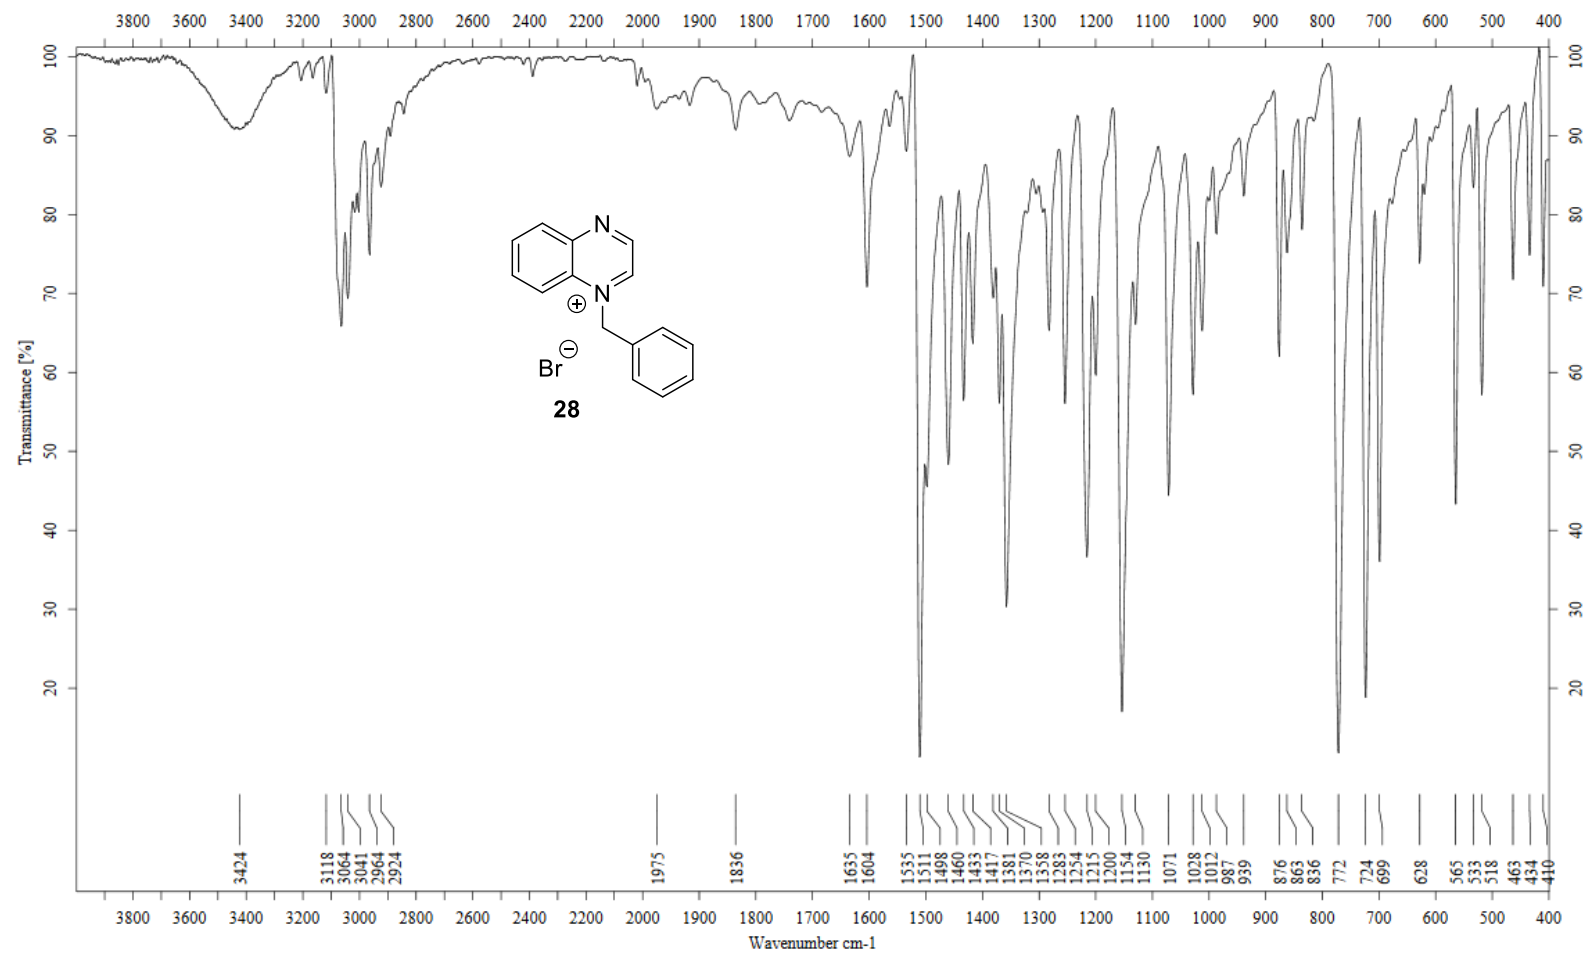

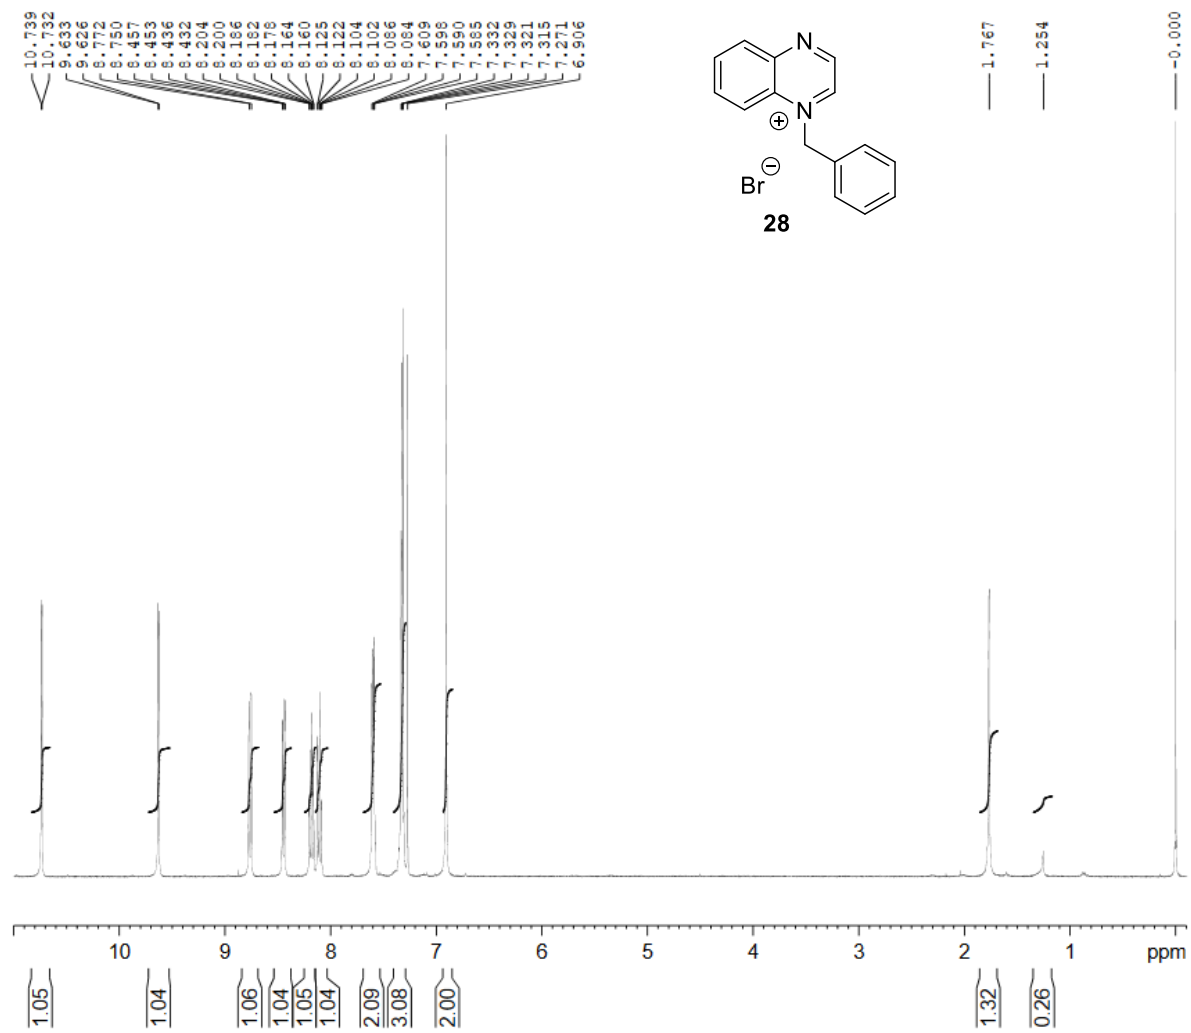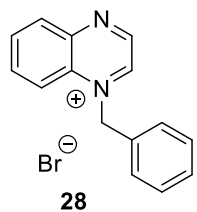

Standard 1H  
125082  
JET0039\_1  
Milen Matyas  
2018.03.08. (DA)

Current Data Parameters  
NAME 125082  
EXPNO 1  
PROCNO 1

F2 - Acquisition Parameters  
Date 20180308  
Time 16.55 h  
INSTRUM spect  
PROBHD Z105190\_0010 (  
PULPROG zg30  
TD 65536  
SOLVENT CDCl3  
NS 64  
DS 2  
SWH 8223.685 Hz  
FIDRES 0.250967 Hz  
AQ 3.9845889 sec  
RG 287  
DW 60.800 usec  
DE 6.50 usec  
TE 293.7 K  
D1 1.00000000 sec  
TD0 1  
SFO1 400.1324710 MHz  
NUC1 1H  
P1 12.70 usec  
PLW1 11.39999962 W

F2 - Processing parameters  
SI 32768  
SF 400.1300054 MHz  
WDW no  
SSB 0  
LB 0 Hz  
GB 0  
PC 1.00

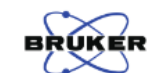

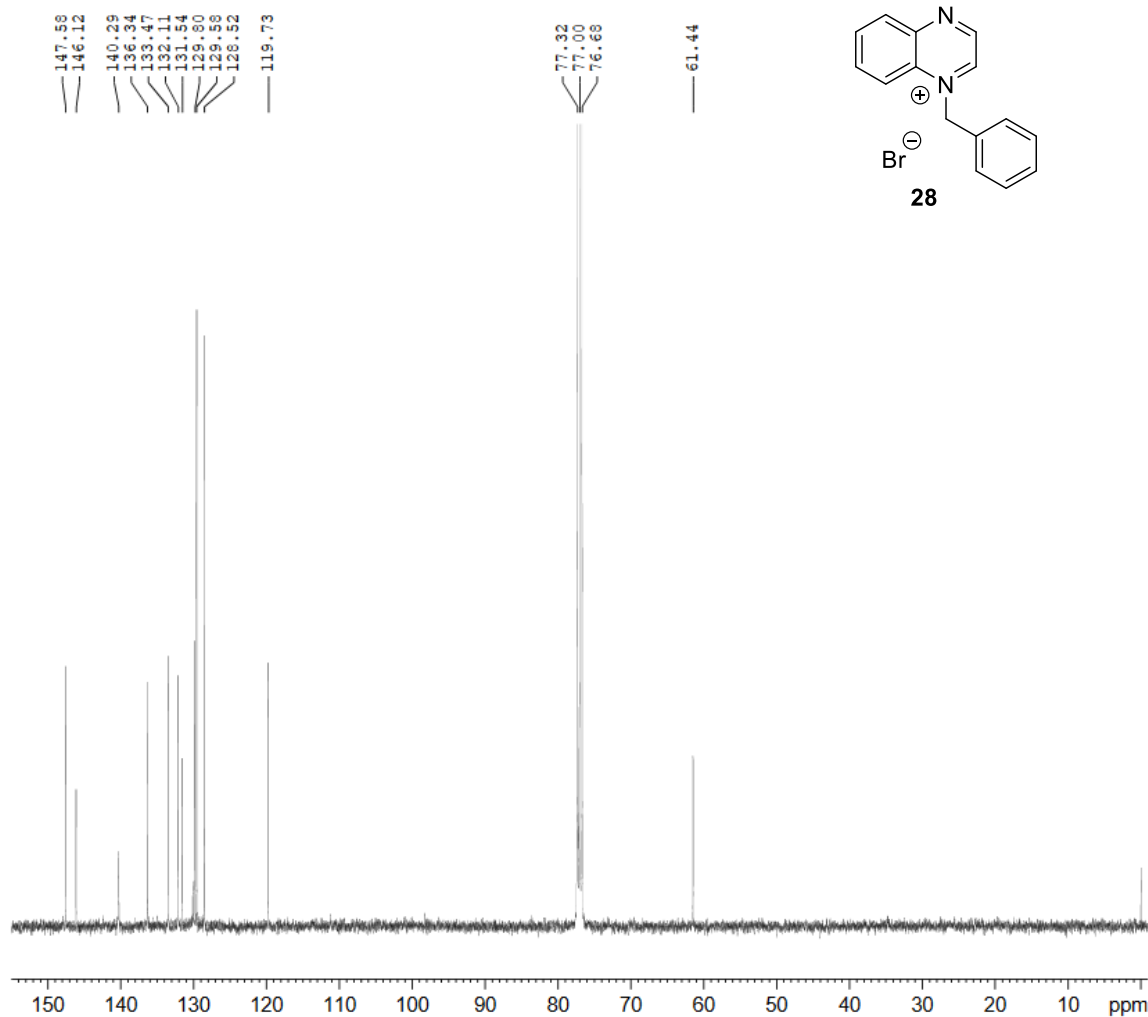

Standard 13C  
125082  
JET0039\_1  
Milen Matyas  
2018.03.08. (DA)

Current Data Parameters  
NAME 125082  
EXPNO 2  
PROCNO 1

F2 - Acquisition Parameters  
Date\_ 20180308  
Time\_ 21.05 h  
INSTRUM spect  
PROBHD Z105190\_0010 (   
PULPROG zgpg30  
TD 65536  
SOLVENT CDC13  
NS 6144  
DS 4  
SWH 24038.461 Hz  
FIDRES 0.733596 Hz  
AQ 1.3631488 sec  
RG 2050  
DW 20.800 usec  
DE 6.50 usec  
TE 295.1 K  
D1 1.00000000 sec  
D11 0.03000000 sec  
TD0 1  
SFO1 100.6228298 MHz  
NUC1 13C  
P1 8.80 usec  
PLW1 46.20000076 W  
SFO2 400.1316005 MHz  
NUC2 1H  
CPDPRG2 waltz16  
PCPD2 90.00 usec  
PLW2 11.39999962 W  
PLW12 0.22700000 W  
PLW13 0.11418000 W

F2 - Processing parameters  
SI 32768  
SF 100.6127728 MHz  
WDW EM  
SSB 0  
LB 1.00 Hz  
GB 0  
PC 1.40

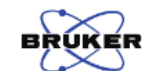



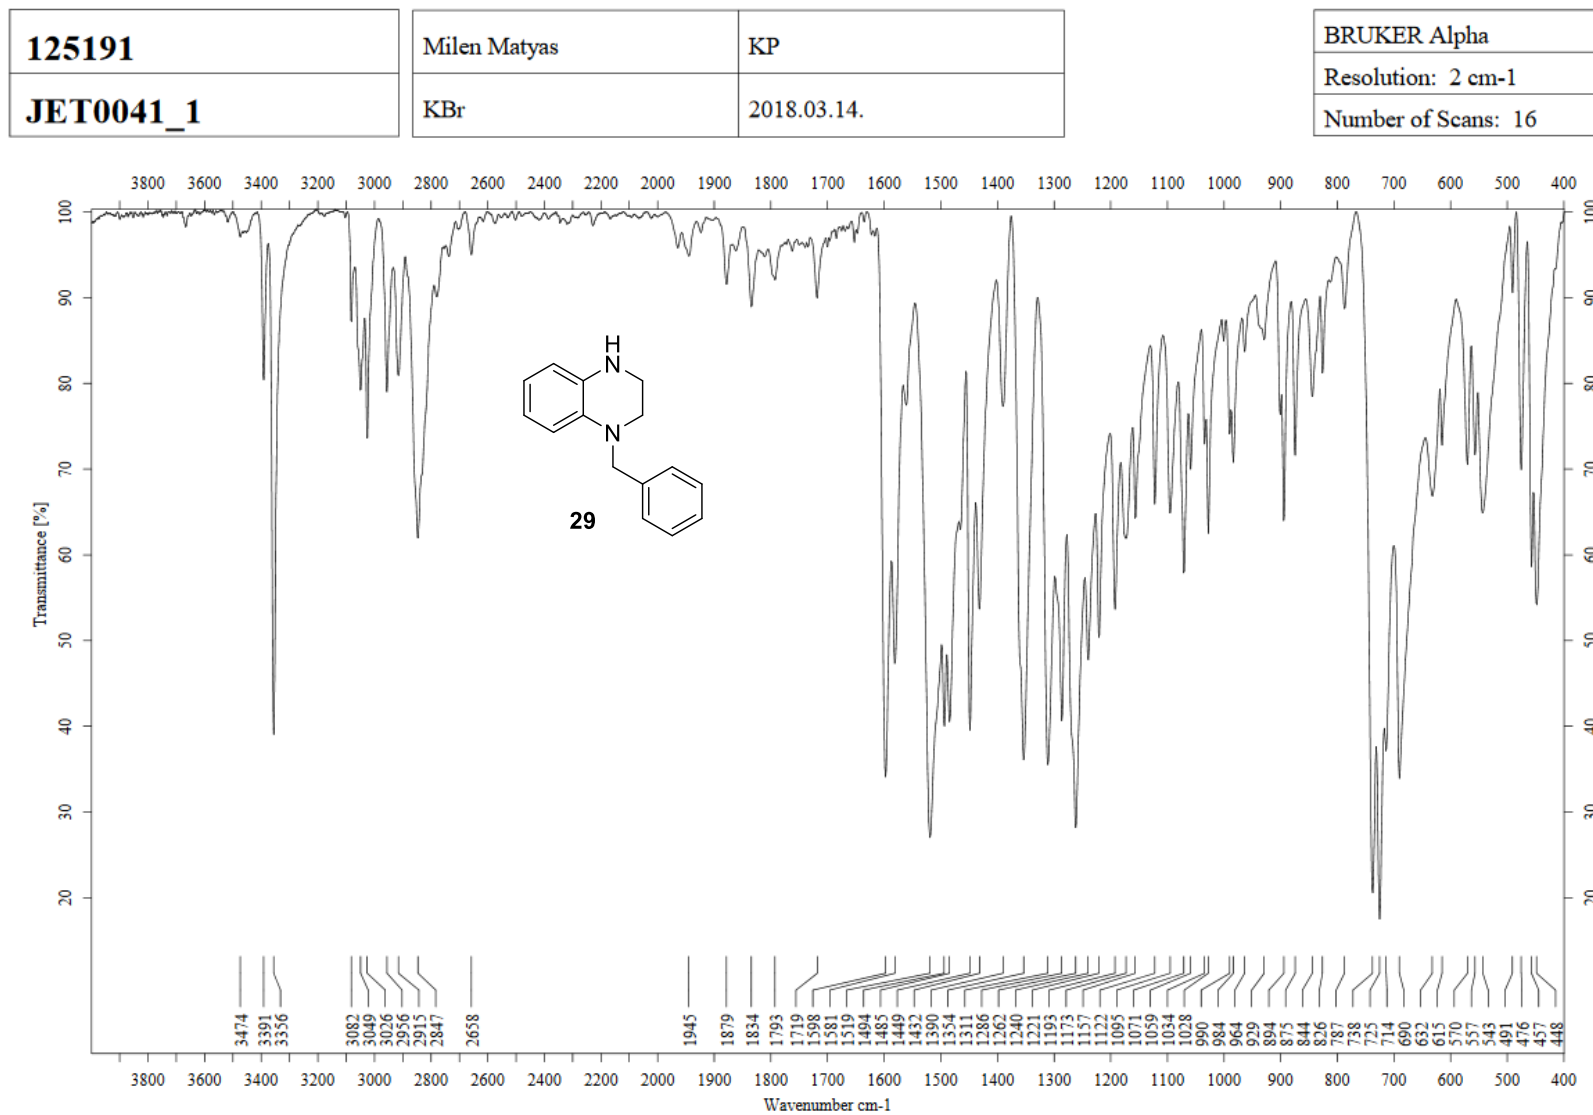

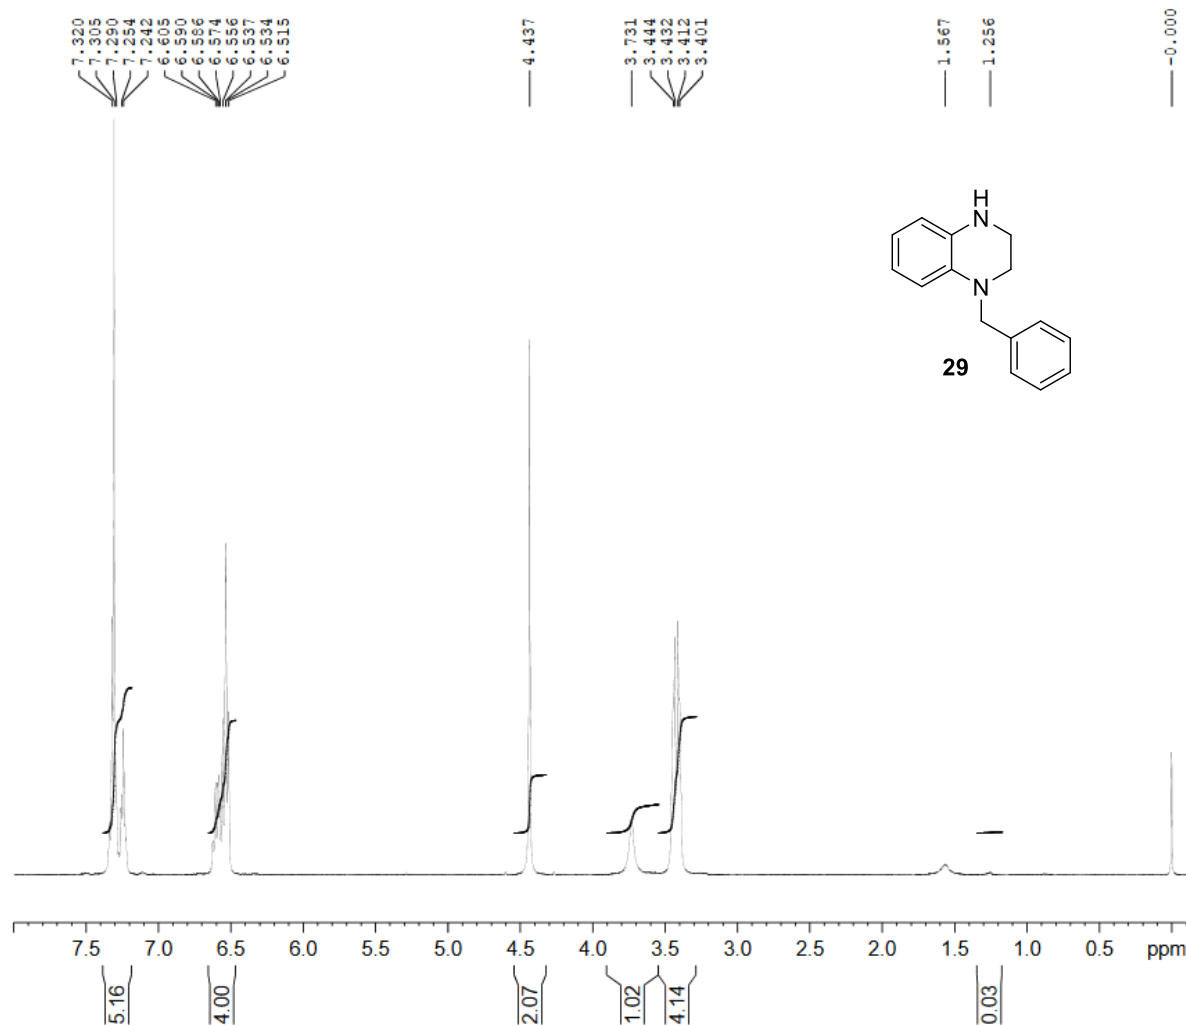

Standard 1H  
125191  
JET0041\_1  
Milen Matyas  
2018.03.14. (DA)

Current Data Parameters  
NAME 125191  
EXPNO 1  
PROCNO 1

F2 - Acquisition Parameters  
Date 20180314  
Time 17.57 h  
INSTRUM spect  
PROBHD Z105190\_0010 (  
PULPROG zg30  
TD 65536  
SOLVENT CDCl3  
NS 64  
DS 2  
SWH 8223.685 Hz  
FIDRES 0.250967 Hz  
AQ 3.9845889 sec  
RG 161  
DW 60.800 usec  
DE 6.50 usec  
TE 293.3 K  
D1 1.00000000 sec  
TD0 1  
SFO1 400.1324710 MHz  
NUC1 1H  
P1 12.70 usec  
PLW1 11.39999962 W

F2 - Processing parameters  
SI 32768  
SF 400.1300170 MHz  
WDW no  
SSB 0  
LB 0 Hz  
GB 0  
PC 1.00

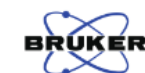

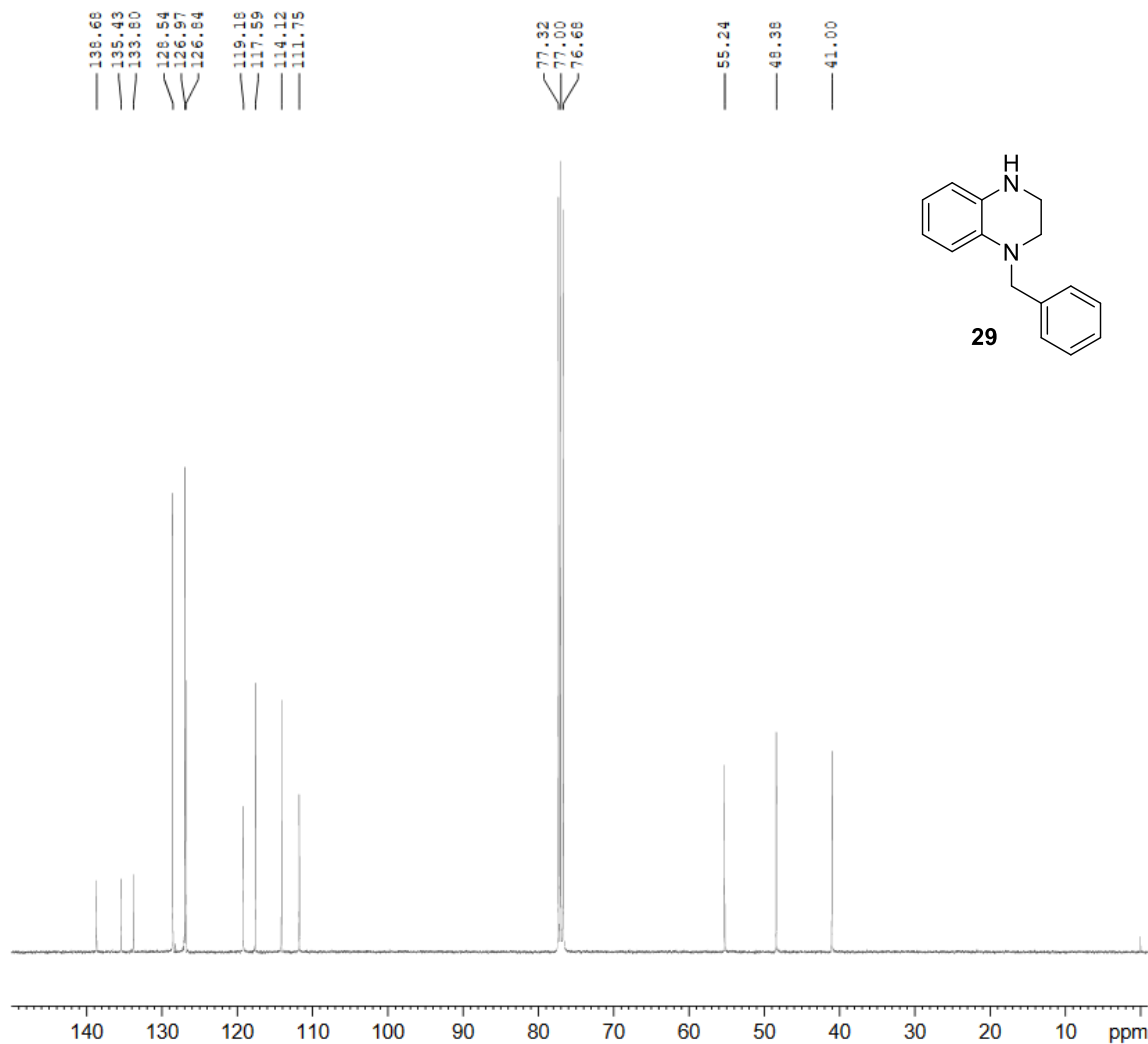

Standard 13C  
125191  
JET0041\_1  
Milen Matyas  
2018.03.14. (DA)

Current Data Parameters  
NAME 125191  
EXPNO 2  
PROCNO 1

F2 - Acquisition Parameters  
Date\_ 20180314  
Time\_ 23.30 h  
INSTRUM spect  
PROBHD Z105190\_0010 (  
PULPROG zgpg30  
TD 65536  
SOLVENT CDC13  
NS 8192  
DS 4  
SWH 24038.461 Hz  
FIDRES 0.733596 Hz  
AQ 1.3631488 sec  
RG 2050  
DW 20.800 usec  
DE 6.50 usec  
TE 294.1 K  
D1 1.00000000 sec  
D11 0.03000000 sec  
TD0 1  
SFO1 100.6228298 MHz  
NUC1 13C  
P1 8.80 usec  
PLW1 46.20000076 W  
SFO2 400.1316005 MHz  
NUC2 1H  
CPDPRG[2] waltz16  
PCPD2 90.00 usec  
PLW2 11.39999962 W  
PLW12 0.22700000 W  
PLW13 0.11418000 W

F2 - Processing parameters  
SI 32768  
SF 100.6127744 MHz  
WDW EM  
SSB 0  
LB 1.00 Hz  
GB 0  
PC 1.40



**125121**  
**JET0040\_1**

|              |             |
|--------------|-------------|
| Milen Matyas | KP          |
| KBr          | 2018.03.09. |

|                     |
|---------------------|
| BRUKER Alpha        |
| Resolution: 2 cm-1  |
| Number of Scans: 16 |

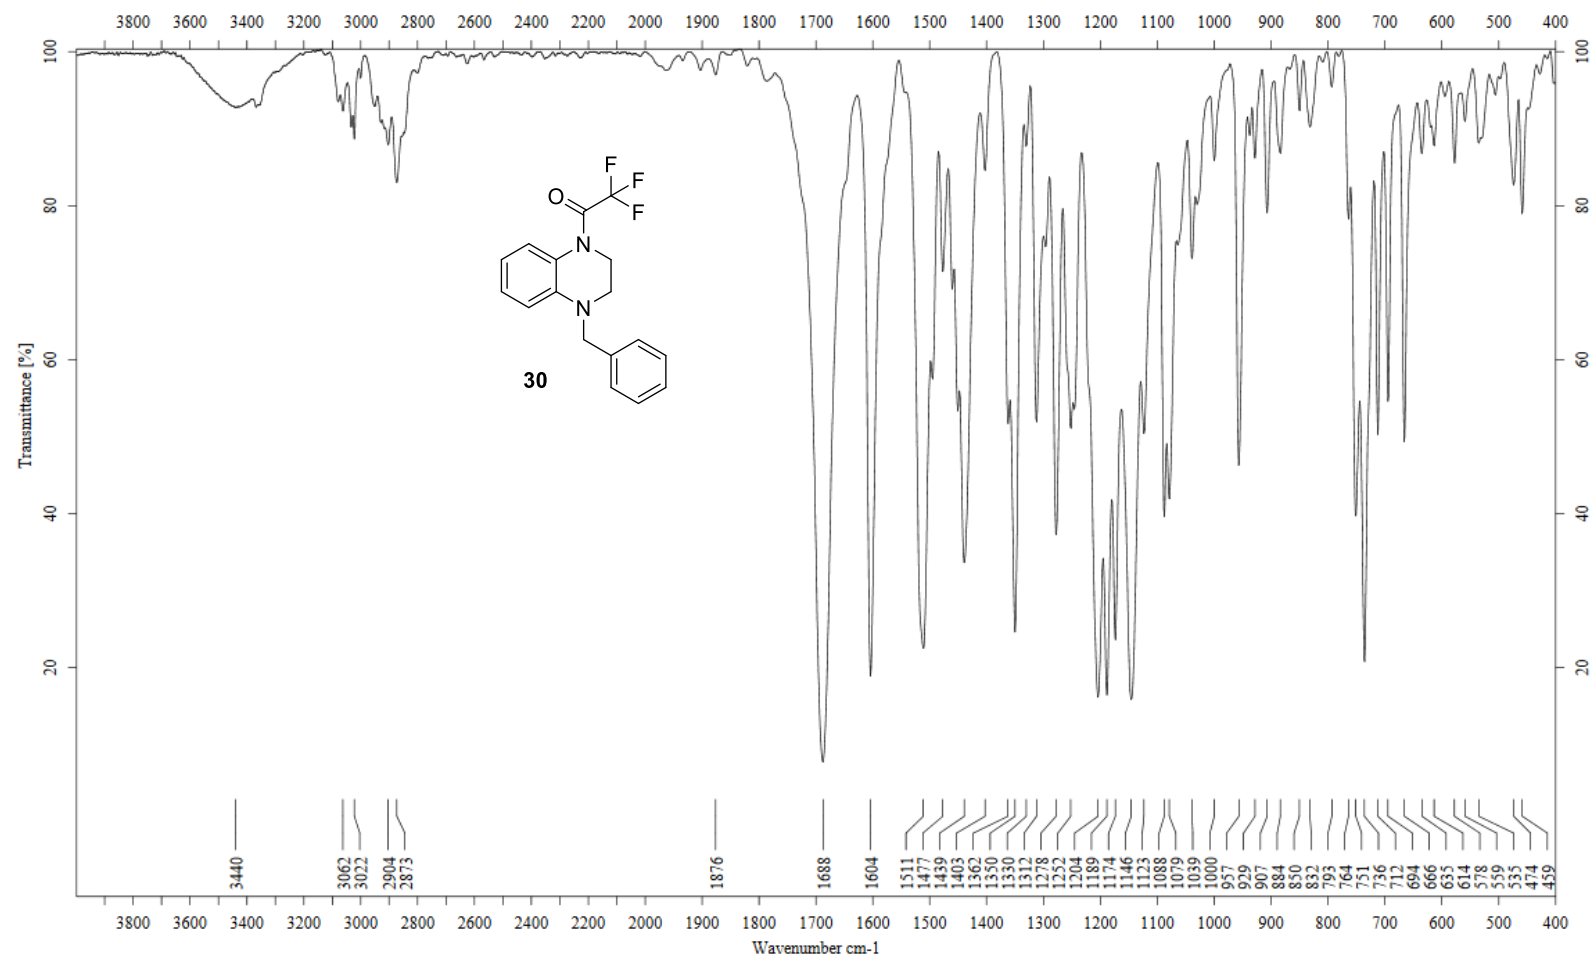

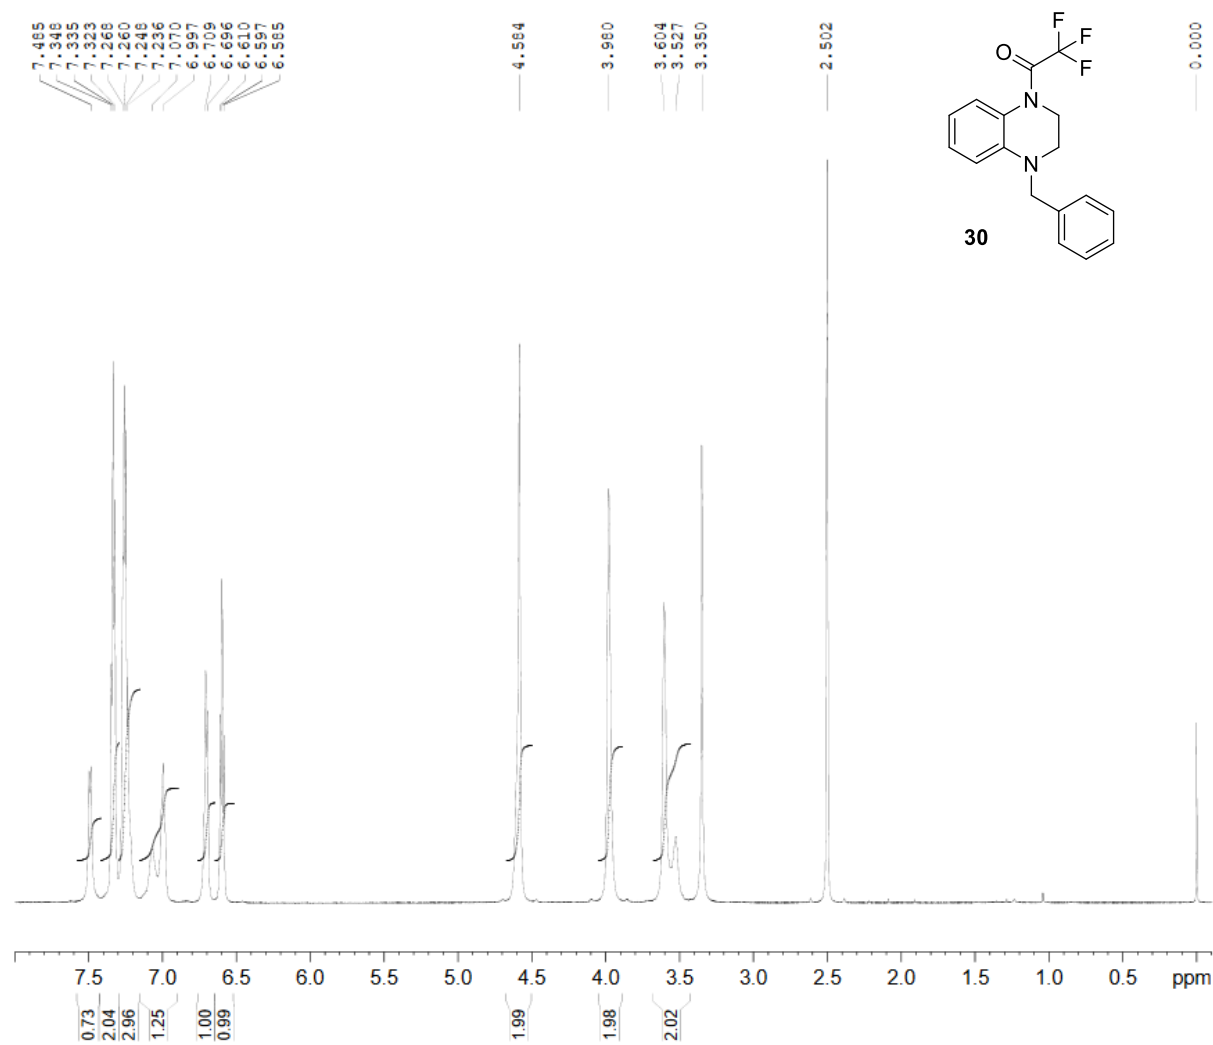

Standard 1H  
125121  
JET0040\_1  
Milen Matyas  
2018.03.10. (HJ)

Current Data Parameters  
NAME 125121  
EXPNO 21  
PROCNO 1

F2 - Acquisition Parameters  
Date\_ 20180310  
Time 16.40 h  
INSTRUM spect  
PROBHD Z145856\_0002 (   
PULPROG zg30  
TD 65536  
SOLVENT DMSO  
NS 16  
DS 4  
SWH 12626.263 Hz  
FIDRES 0.385323 Hz  
AQ 2.5952256 sec  
RG 133.88  
DW 39.600 usec  
DE 25.00 usec  
TE 295.0 K  
D1 1.00000000 sec  
TD0 1  
SFO1 600.1642011 MHz  
NUC1 1H  
P1 11.50 usec  
PLW1 28.00000000 W

F2 - Processing parameters  
SI 65536  
SF 600.1600039 MHz  
WDW no  
SSB 0  
LB 0 Hz  
GB 0  
PC 1.00



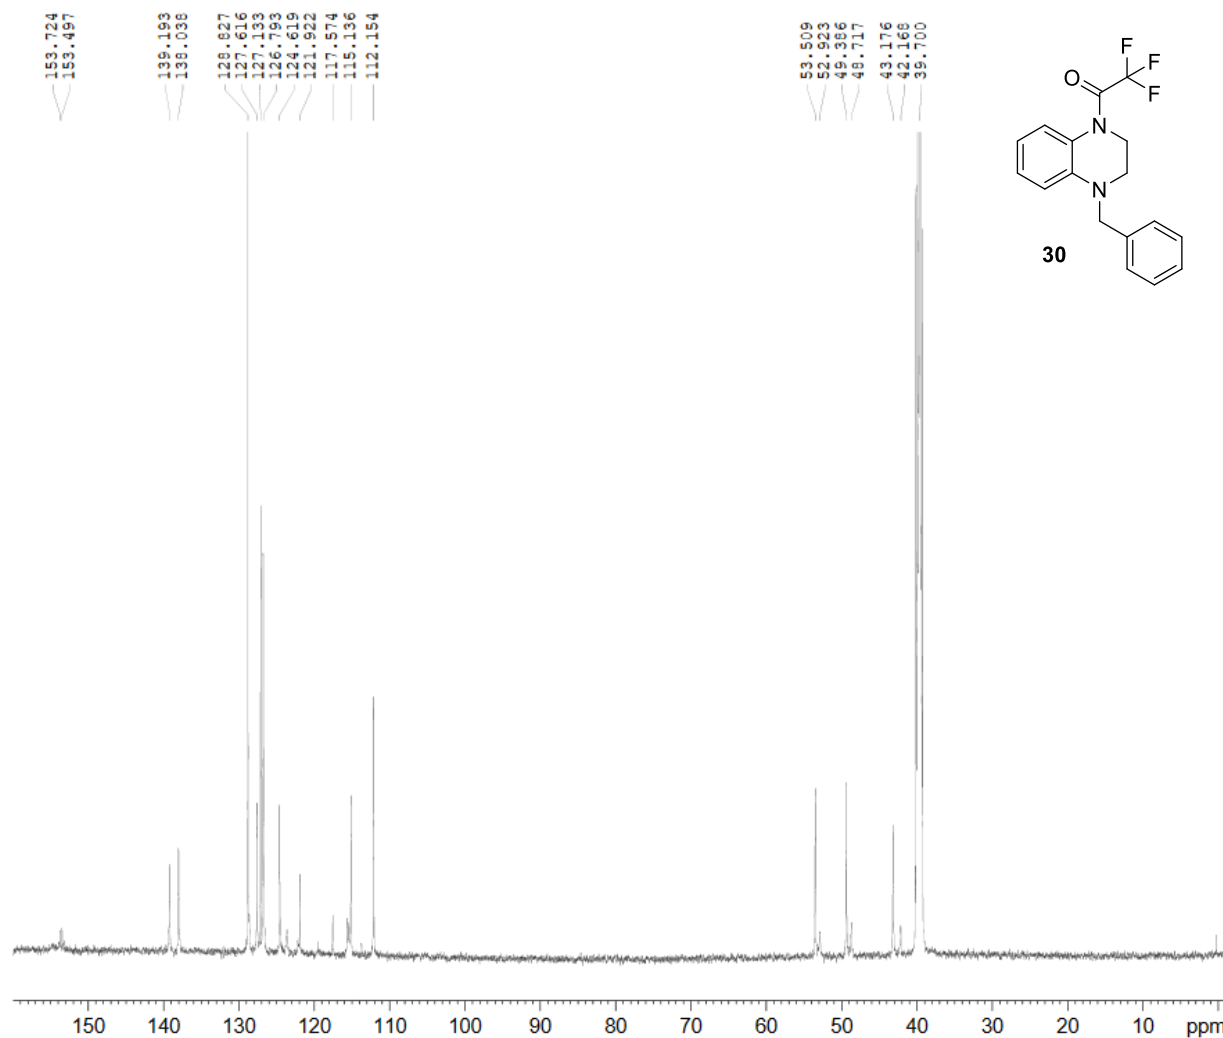

Standard 13C  
125121  
JET0040\_1  
Milen Matyas  
2018.03.10. (HJ)

Current Data Parameters  
NAME 125121  
EXPNO 22  
PROCNO 1

F2 - Acquisition Parameters  
Date\_ 20180310  
Time\_ 19.30 h  
INSTRUM spect  
PROBHD Z145856\_0002 (   
PULPROG zgpg30  
TD 65536  
SOLVENT DMSO  
NS 4096  
DS 4  
SWH 36057.691 Hz  
FIDRES 1.100393 Hz  
AQ 0.9087659 sec  
RG 196.07  
DW 13.867 usec  
DE 18.00 usec  
TE 295.0 K  
D1 1.50000000 sec  
D11 0.03000000 sec  
TD0 1  
SFO1 150.9254424 MHz  
NUC1 13C  
P1 10.00 usec  
PLW1 60.36299896 W  
SFO2 600.1624006 MHz  
NUC2 1H  
CPDPRG[2] waltz16  
PCPD2 80.00 usec  
PLW2 26.42600060 W  
PLW12 0.59460002 W  
PLW13 0.29861000 W

F2 - Processing parameters  
SI 65536  
SF 150.9103920 MHz  
WDW EM  
SSB 0  
LB 3.00 Hz  
GB 0  
PC 1.40

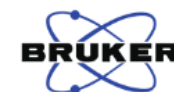

|           |              |             |                     |
|-----------|--------------|-------------|---------------------|
| 125128    | Milen Matyas | KP          | BRUKER Alpha        |
| MIM0445_1 | KBr          | 2018.03.10. | Resolution: 2 cm-1  |
|           |              |             | Number of Scans: 16 |

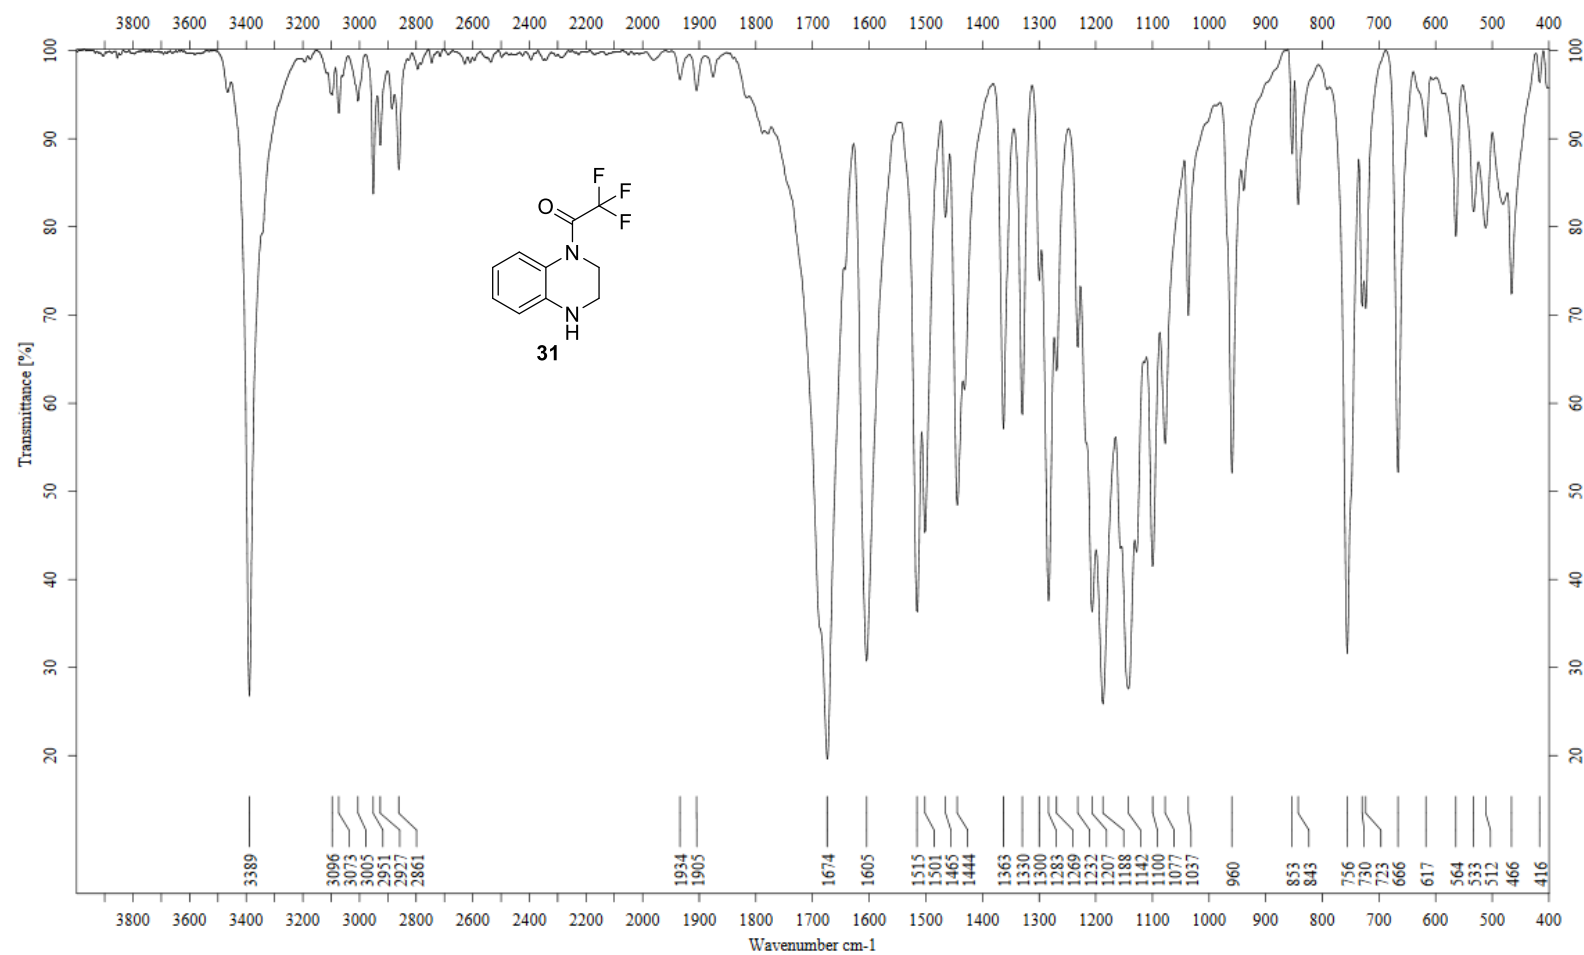

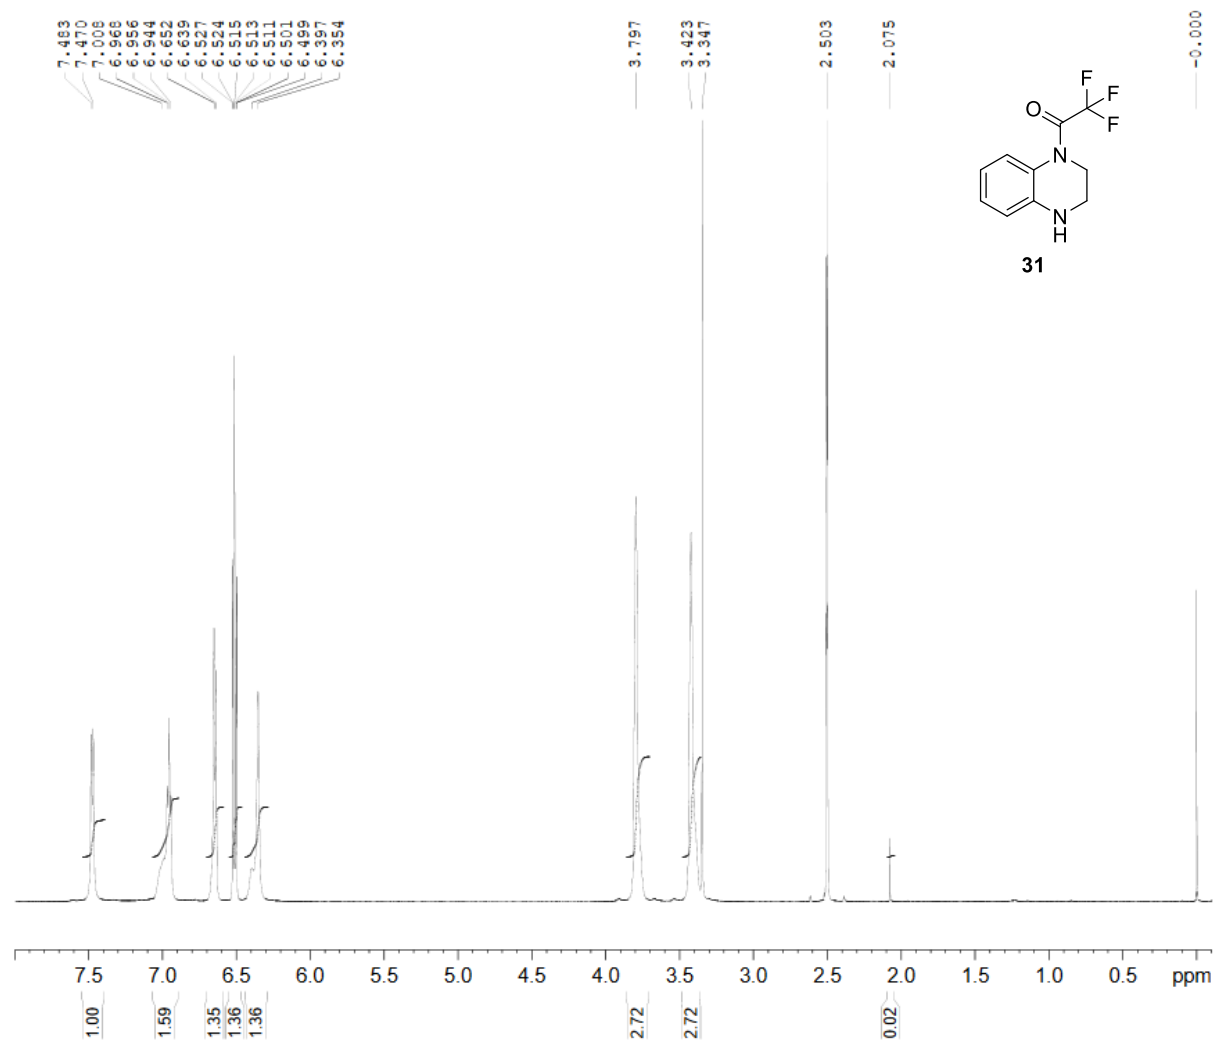

Standard 1H  
125128  
MIM0445\_1  
Milen Matyas  
2018.03.10. (HJ)

Current Data Parameters  
NAME 125128  
EXPNO 11  
PROCNO 1

F2 - Acquisition Parameters  
Date\_ 20180310  
Time 19.36 h  
INSTRUM spect  
PROBHD Z145856\_0002 (   
PULPROG zg30  
TD 65536  
SOLVENT DMSO  
NS 16  
DS 4  
SWH 12626.263 Hz  
FIDRES 0.385323 Hz  
AQ 2.5952256 sec  
RG 174.19  
DW 39.600 usec  
DE 25.00 usec  
TE 295.0 K  
D1 1.00000000 sec  
TD0 1  
SFO1 600.1642011 MHz  
NUC1 1H  
P1 11.50 usec  
PLW1 28.00000000 W

F2 - Processing parameters  
SI 65536  
SF 600.1600030 MHz  
WDW EM  
SSB 0  
LB 0.10 Hz  
GB 0  
PC 1.00

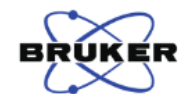



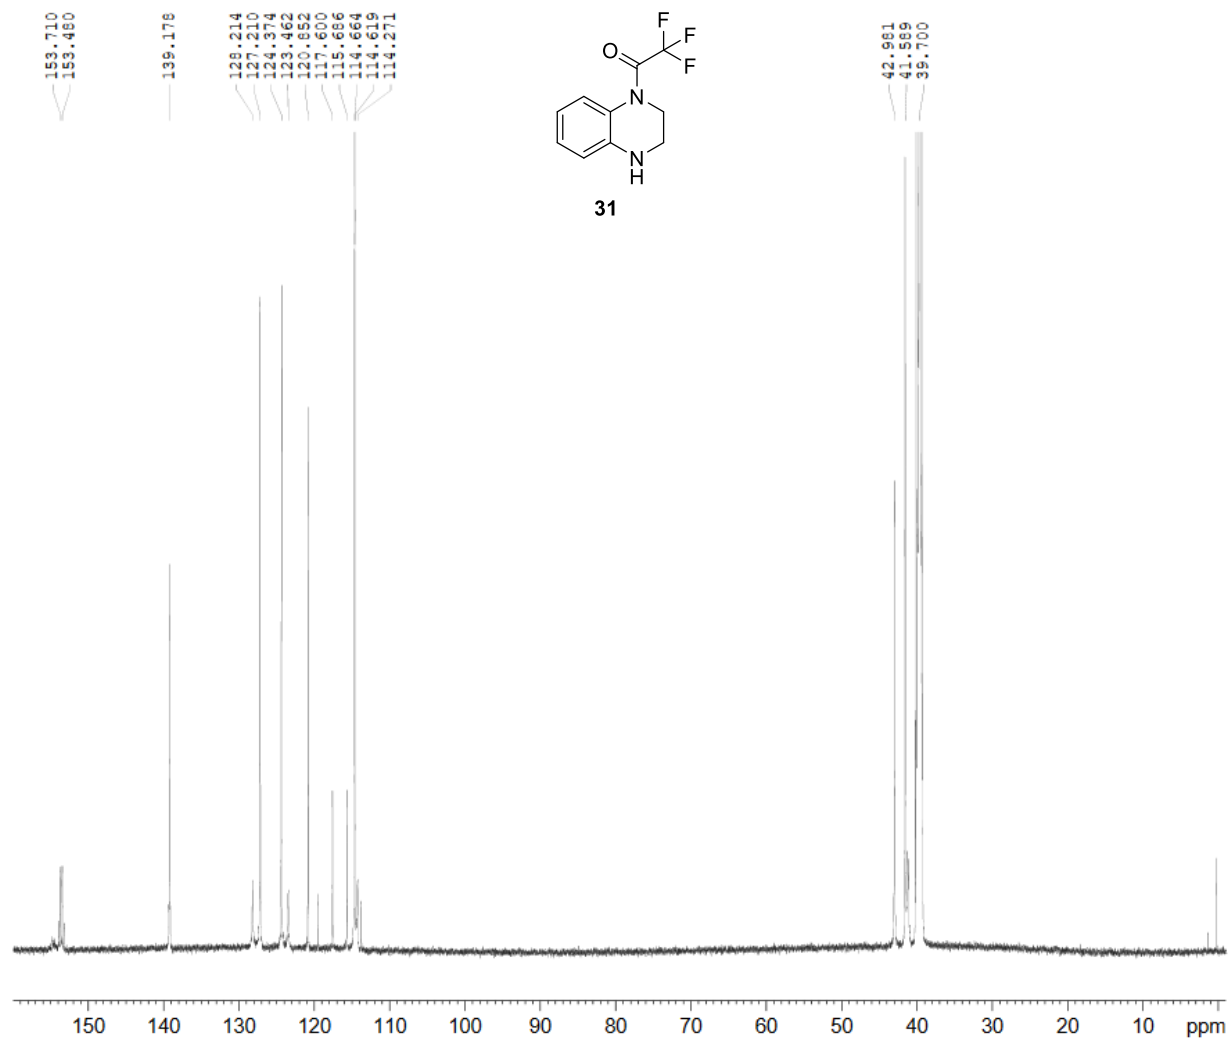

Standard 13C  
125128  
MIM0445\_1  
Milen Matyas  
2018.03.10. (HJ)

Current Data Parameters  
NAME 125128  
EXPNO 12  
PROCNO 1

F2 - Acquisition Parameters  
Date\_ 20180310  
Time\_ 22.26 h  
INSTRUM spect  
PROBHD Z145856\_0002 (Z145856\_0002)  
PULPROG zgpg30  
TD 65536  
SOLVENT DMSO  
NS 4096  
DS 4  
SWH 36057.691 Hz  
FIDRES 1.100393 Hz  
AQ 0.9087659 sec  
RG 196.07  
DW 13.867 usec  
DE 18.00 usec  
TE 295.0 K  
D1 1.50000000 sec  
D11 0.03000000 sec  
TD0 1  
SFO1 150.9254424 MHz  
NUC1 13C  
P1 10.00 usec  
PLW1 60.36299896 W  
SFO2 600.1624006 MHz  
NUC2 1H  
CPDPRG[2] waltz16  
PCPD2 80.00 usec  
PLW2 26.42600060 W  
PLW12 0.59460002 W  
PLW13 0.29861000 W

F2 - Processing parameters  
SI 65536  
SF 150.9103911 MHz  
WDW EM  
SSB 0  
LB 1.00 Hz  
GB 0  
PC 1.40



**137810**  
**MIM0517\_1**

|              |             |
|--------------|-------------|
| Milen Matyas | KP          |
| KBr          | 2021.12.17. |

|                     |
|---------------------|
| BRUKER Alpha        |
| Resolution: 2 cm-1  |
| Number of Scans: 16 |

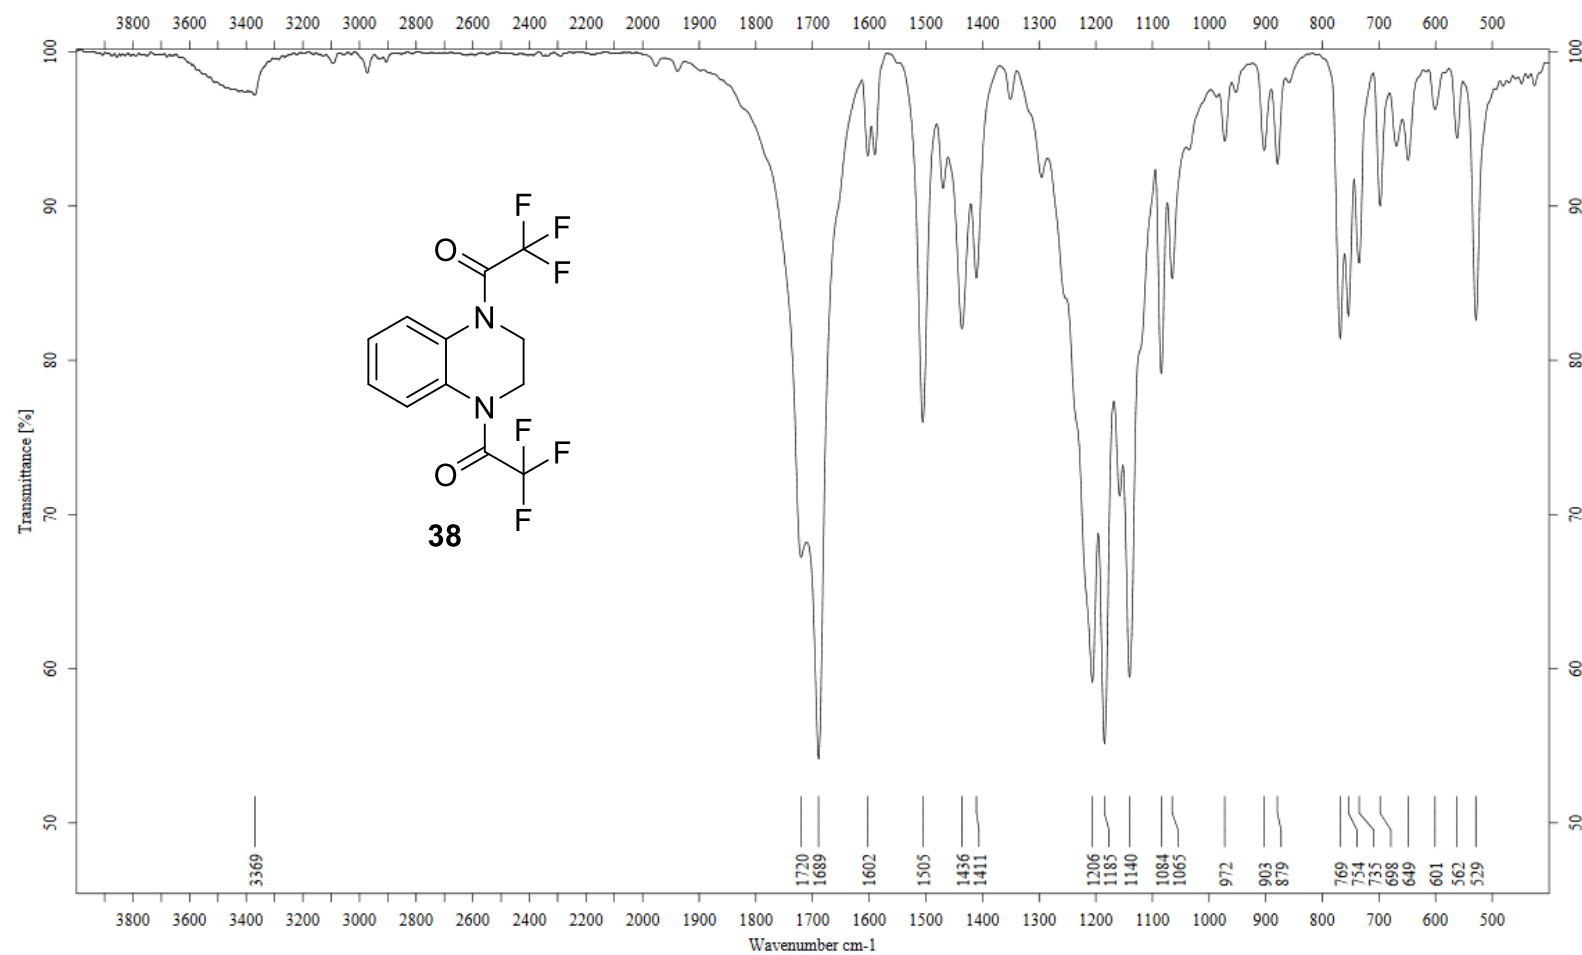

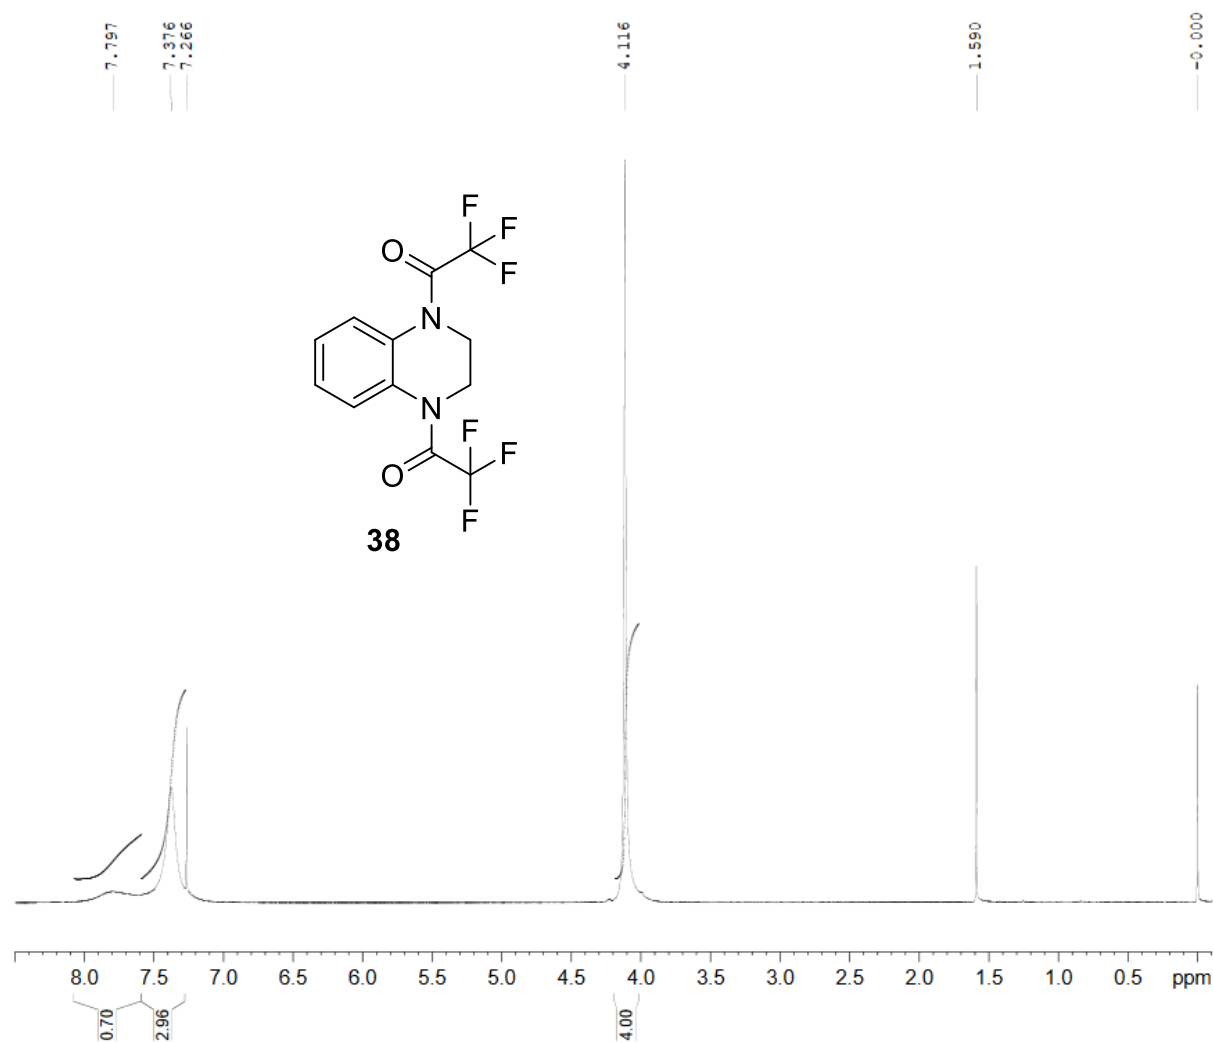

Standard 1H  
137810  
MIM0517\_1  
Milen Matyas  
2021.12.17. (KP)

Current Data Parameters  
NAME 137810  
EXPNO 13  
PROCNO 1

F2 - Acquisition Parameters  
Date\_ 20211217  
Time 12.33 h  
INSTRUM spect  
PROBHD Z145856\_0002 (  
PULPROG zg30  
TD 65536  
SOLVENT CDC13  
NS 16  
DS 2  
SWH 12019.230 Hz  
FIDRES 0.366798 Hz  
AQ 2.7262976 sec  
RG 196.07  
DW 41.600 usec  
DE 25.00 usec  
TE 295.0 K  
D1 1.00000000 sec  
TD0 1  
SFO1 600.0537053 MHz  
NUC1 1H  
P1 11.50 usec  
PLW1 28.00000000 W

F2 - Processing parameters  
SI 65536  
SF 600.0500117 MHz  
WDW no  
SSB 0  
LB 0 Hz  
GB 0  
PC 1.00

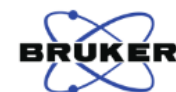

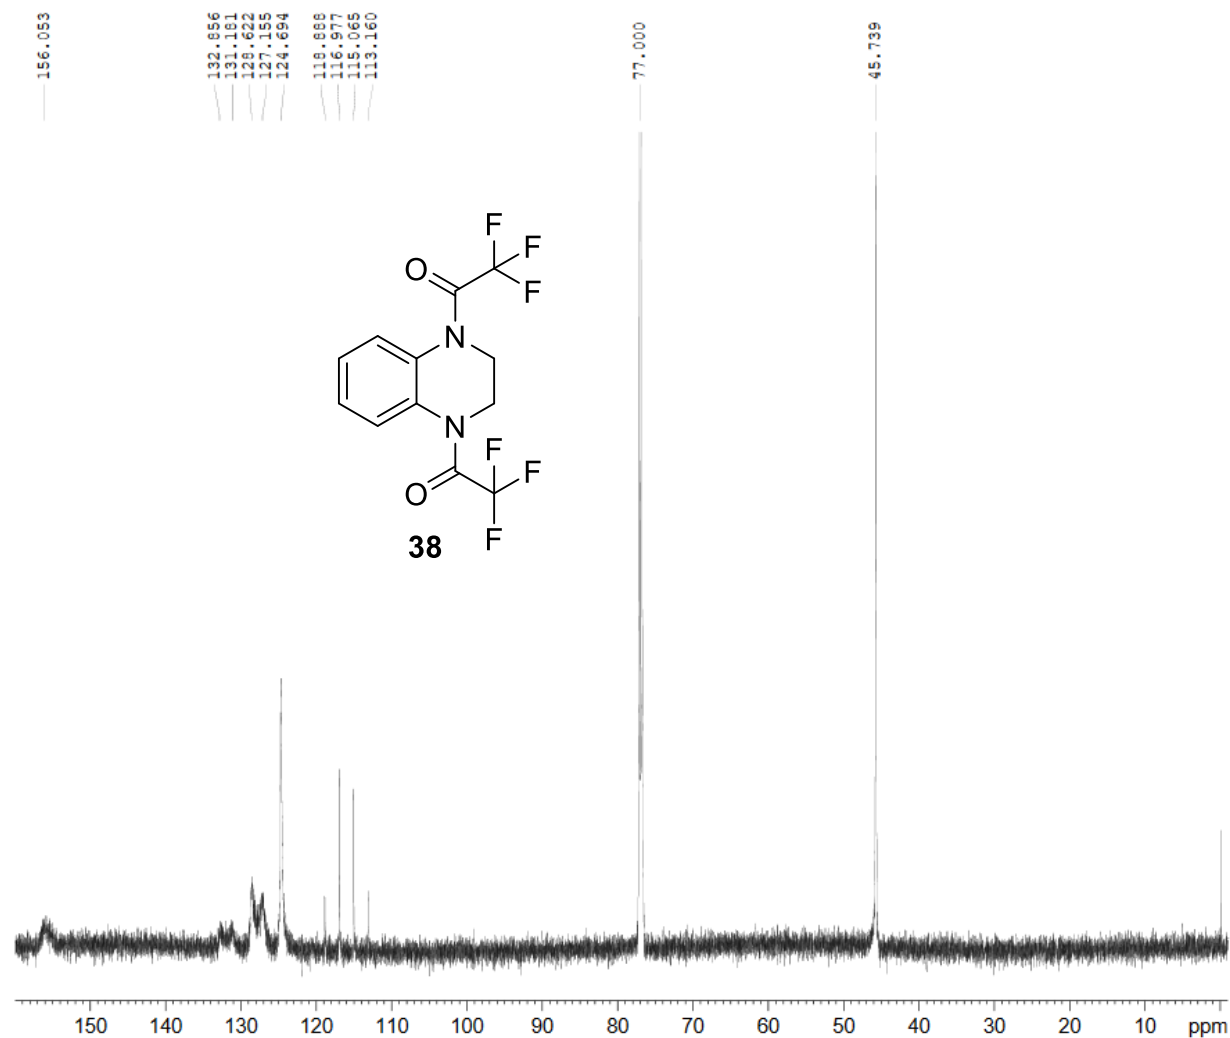

Standard 13C  
137810  
MIM0517\_1  
Milen Matyas  
2021.12.16. (KP)

Current Data Parameters  
NAME 137810  
EXPNO 12  
PROCNO 1

F2 - Acquisition Parameters  
Date\_ 20211216  
Time\_ 17.28 h  
INSTRUM spect  
PROBHD Z145856\_0002 (   
PULPROG zgpg30  
TD 65536  
SOLVENT CDCl3  
NS 2048  
DS 4  
SWH 36231.883 Hz  
FIDRES 1.105709 Hz  
AQ 0.9043968 sec  
RG 196.07  
DW 13.800 usec  
DE 18.00 usec  
TE 295.0 K  
D1 1.00000000 sec  
D11 0.03000000 sec  
TD0 1  
SFO1 150.8977808 MHz  
NUC1 13C  
P1 10.00 usec  
PLW1 64.59899902 W  
SFO2 600.0524002 MHz  
NUC2 1H  
CPDPRG[2] waltz16  
PCPD2 80.00 usec  
PLW2 31.00000000 W  
PLW12 0.69749999 W  
PLW13 0.35029000 W

F2 - Processing parameters  
SI 32768  
SF 150.8826990 MHz  
WDW no  
SSB 0  
LB 0 Hz  
GB 0  
PC 1.40



MIM0517\_1, Milen Matyas (MM)

137810gcms 471 (5.494)

auto\_gc\_15perc\_ACN, 17-Dec-2021 + 08:46:44

Scan EI+  
1.90e7

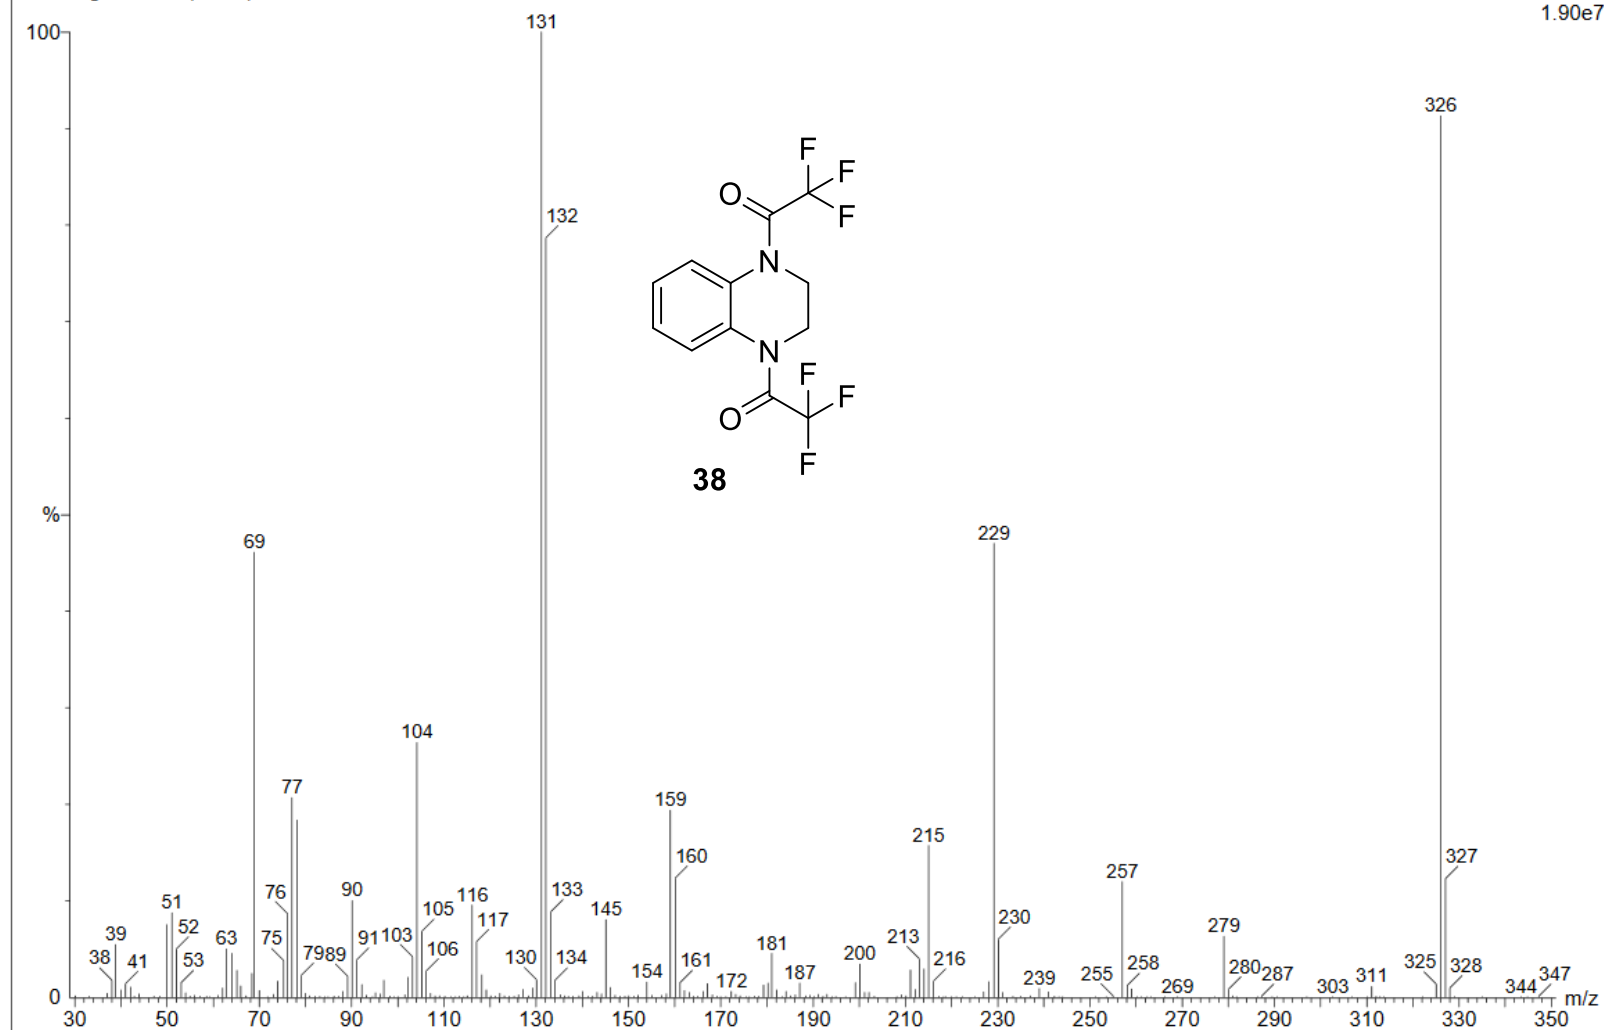

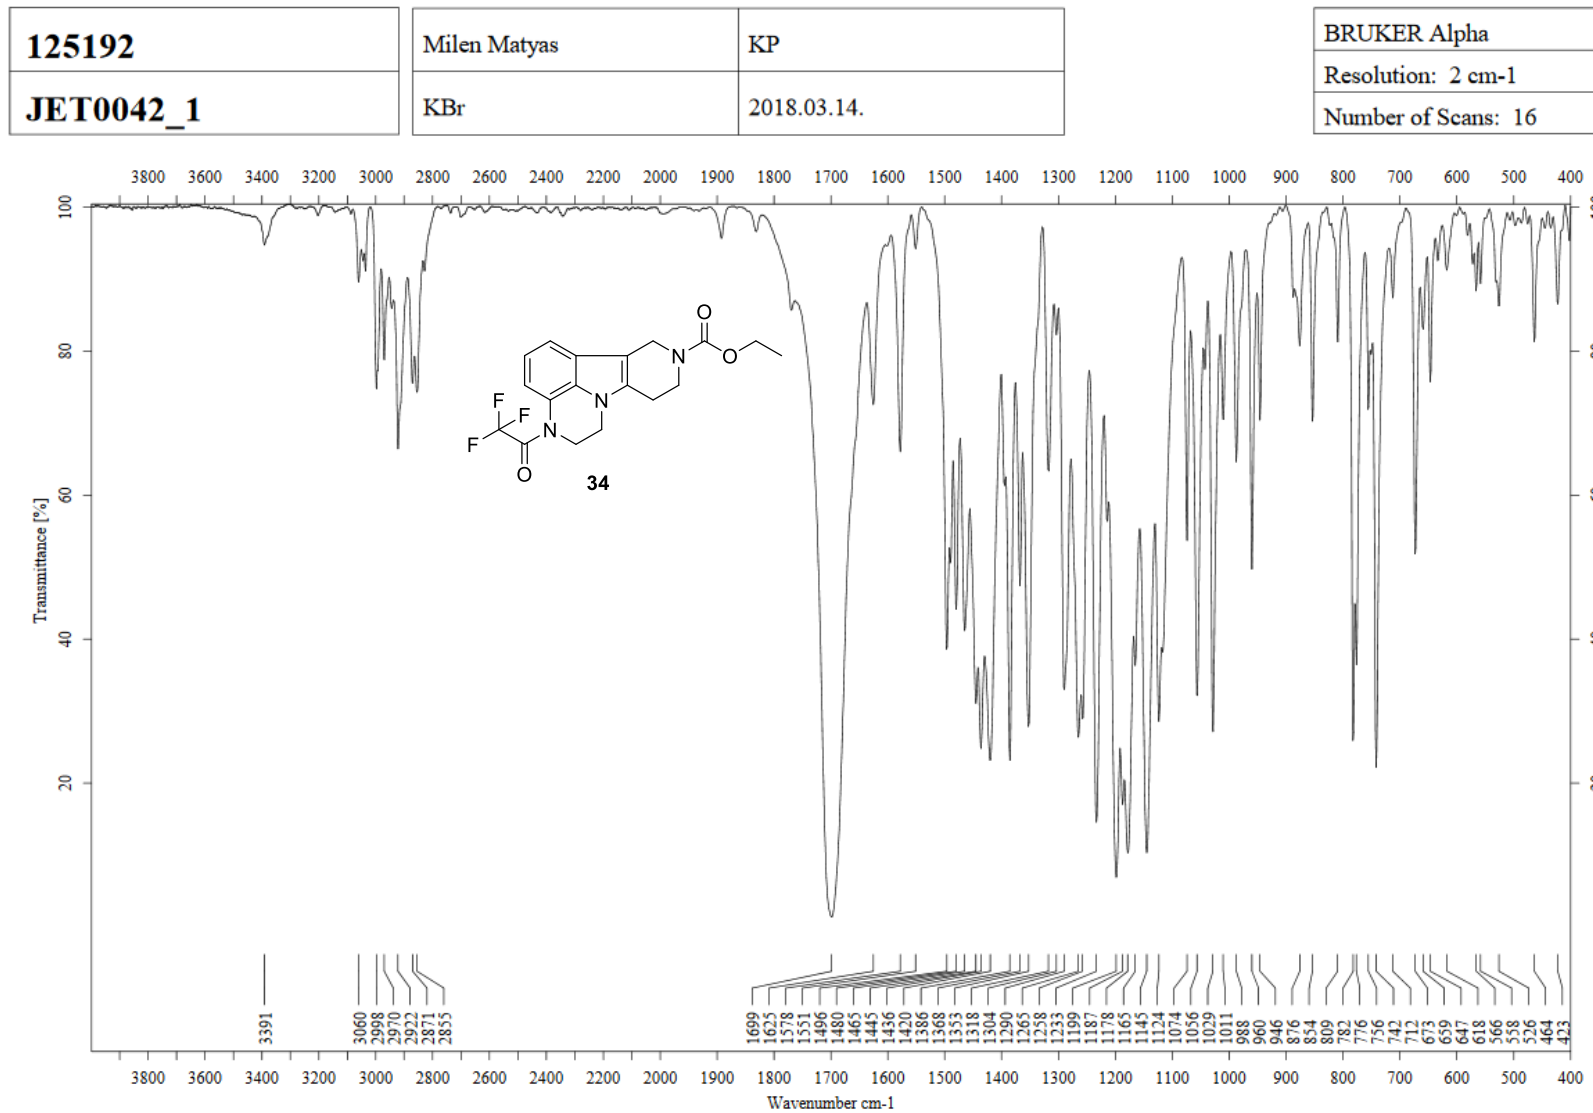

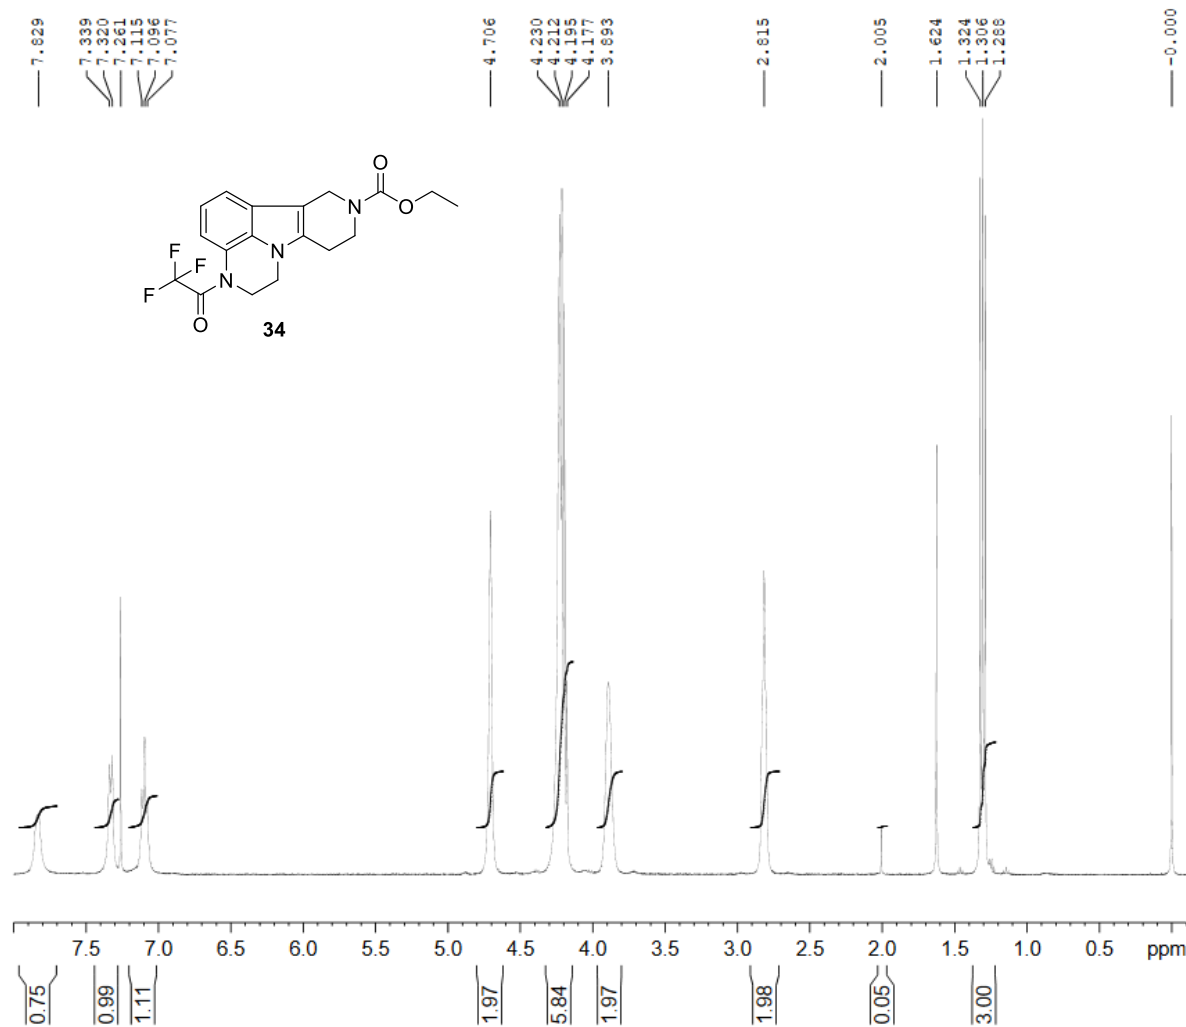

Standard 1H  
125192  
JET0042\_1  
Milen Matyas  
2018.03.14. (DA)

Current Data Parameters  
NAME 125192  
EXPNO 1  
PROCNO 1

F2 - Acquisition Parameters  
Date\_ 20180314  
Time\_ 23.38 h  
INSTRUM spect  
PROBHD Z105190\_0010 (  
PULPROG zg30  
TD 65536  
SOLVENT CDCl3  
NS 64  
DS 2  
SWH 8223.685 Hz  
FIDRES 0.250967 Hz  
AQ 3.9845889 sec  
RG 161  
DW 60.800 usec  
DE 6.50 usec  
TE 293.1 K  
D1 1.00000000 sec  
TD0 1  
SFO1 400.1324710 MHz  
NUC1 1H  
P1 12.70 usec  
PLW1 11.39999962 W

F2 - Processing parameters  
SI 32768  
SF 400.1300093 MHz  
WDW no  
SSB 0  
LB 0 Hz  
GB 0  
PC 1.00



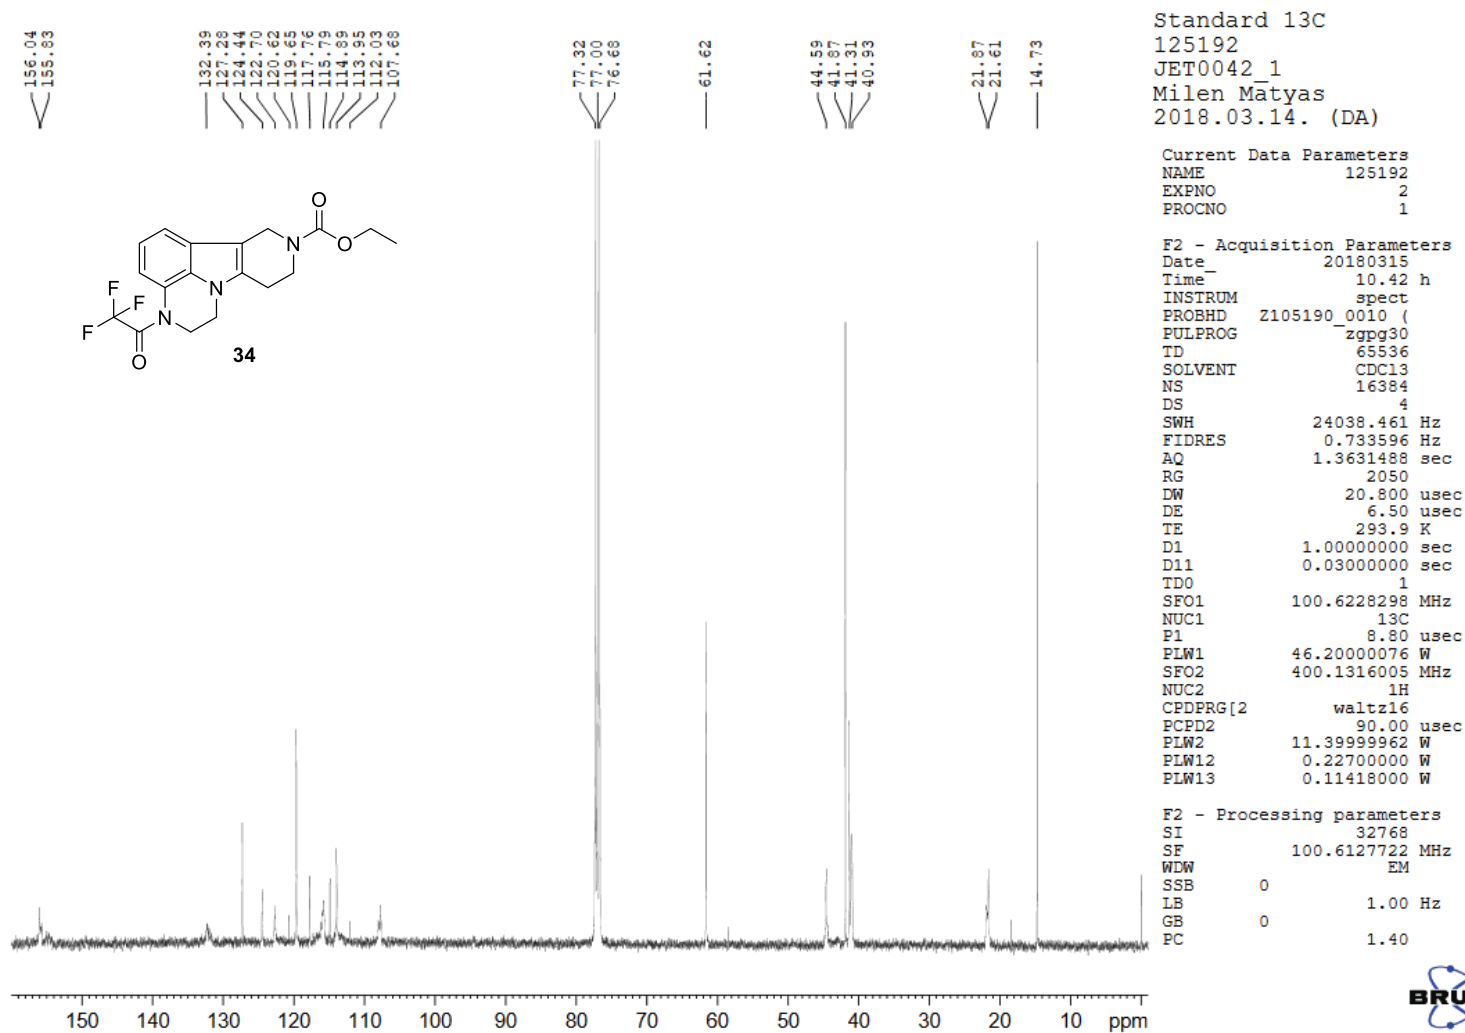



|           |              |            |                     |
|-----------|--------------|------------|---------------------|
| 122535    | Milen Matyas | MM         | BRUKER Alpha        |
| LVE0031_1 | KBr          | 27/06/2017 | Resolution: 2 cm-1  |
|           |              |            | Number of Scans: 16 |

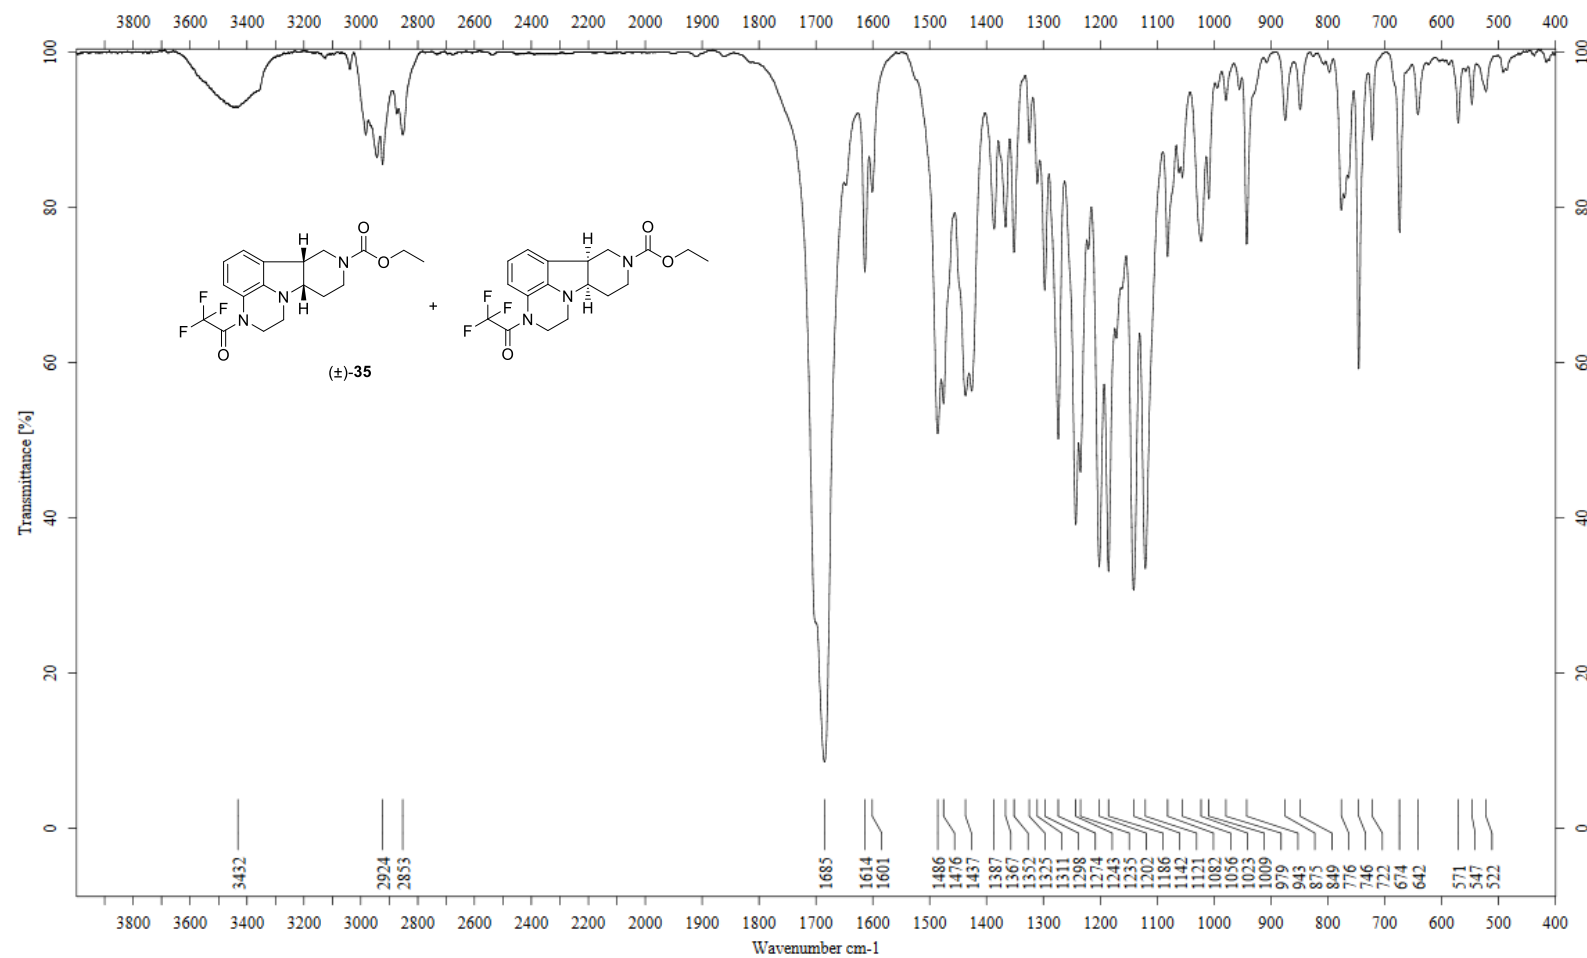

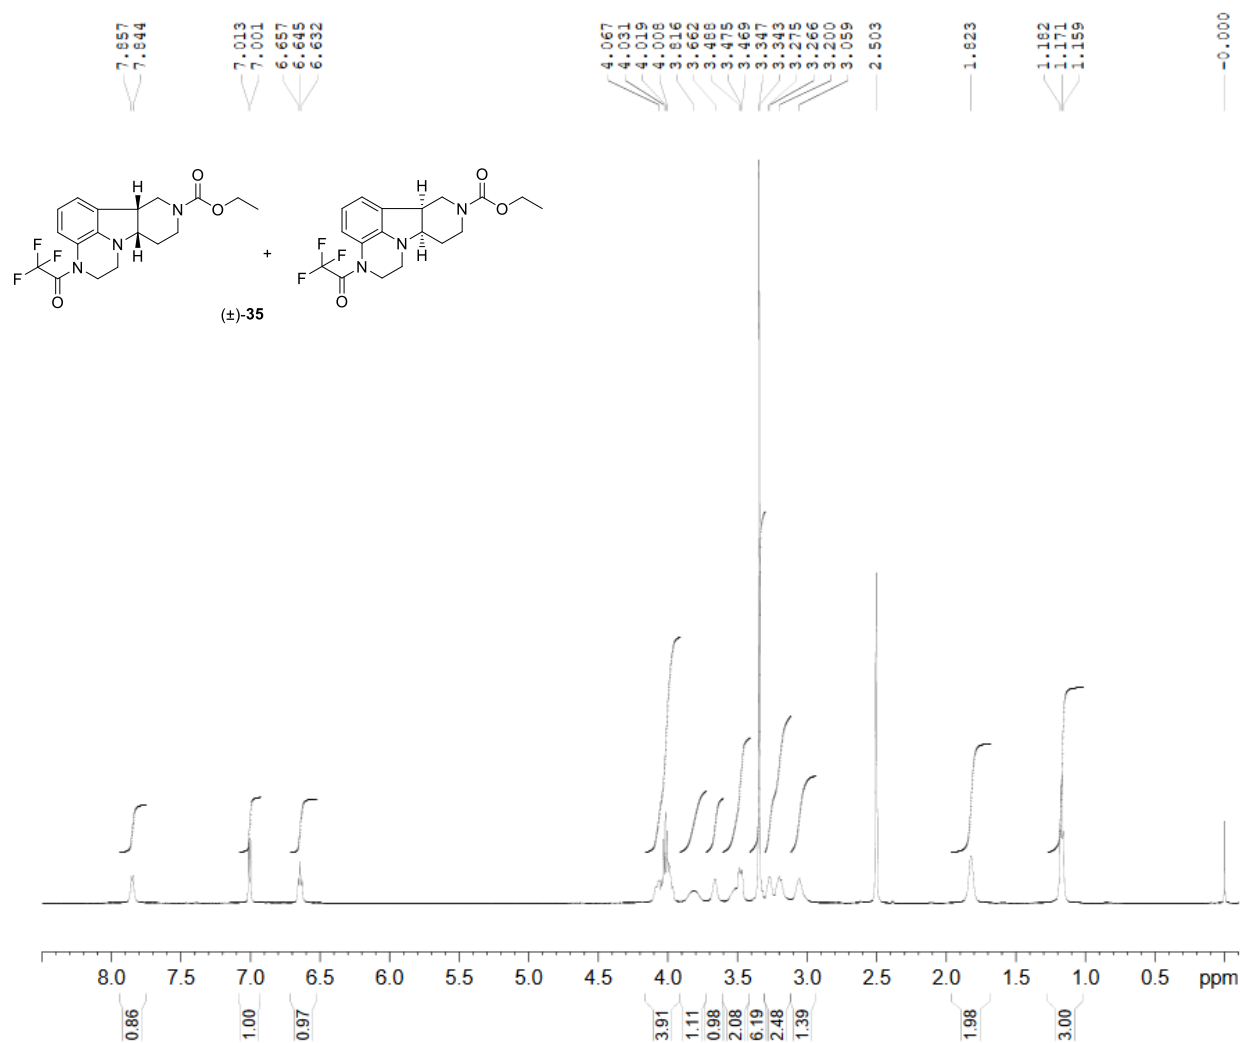

Standard 1H  
122535  
LVE0031\_1  
Milen Matyas  
2017.06.28. (HJ)

Current Data Parameters  
NAME 122535  
EXPNO 11  
PROCNO 1

F2 - Acquisition Parameters  
Date\_ 20170628  
Time 16.29  
INSTRUM spect  
PROBHD 5 mm CPPBBO BB  
PULPROG zg30  
TD 65536  
SOLVENT DMSO  
NS 16  
DS 4  
SWH 12626.263 Hz  
FIDRES 0.192661 Hz  
AQ 2.5952256 sec  
RG 196.07  
DW 39.600 usec  
DE 25.00 usec  
TE 295.0 K  
D1 1.00000000 sec  
TD0 1

===== CHANNEL f1 =====  
SFO1 600.1642011 MHz  
NUC1 1H  
P1 11.50 usec  
PLW1 28.00000000 W

F2 - Processing parameters  
SI 65536  
SF 600.1600028 MHz  
WDW EM  
SSB 0  
LB 0.10 Hz  
GB 0  
PC 1.00



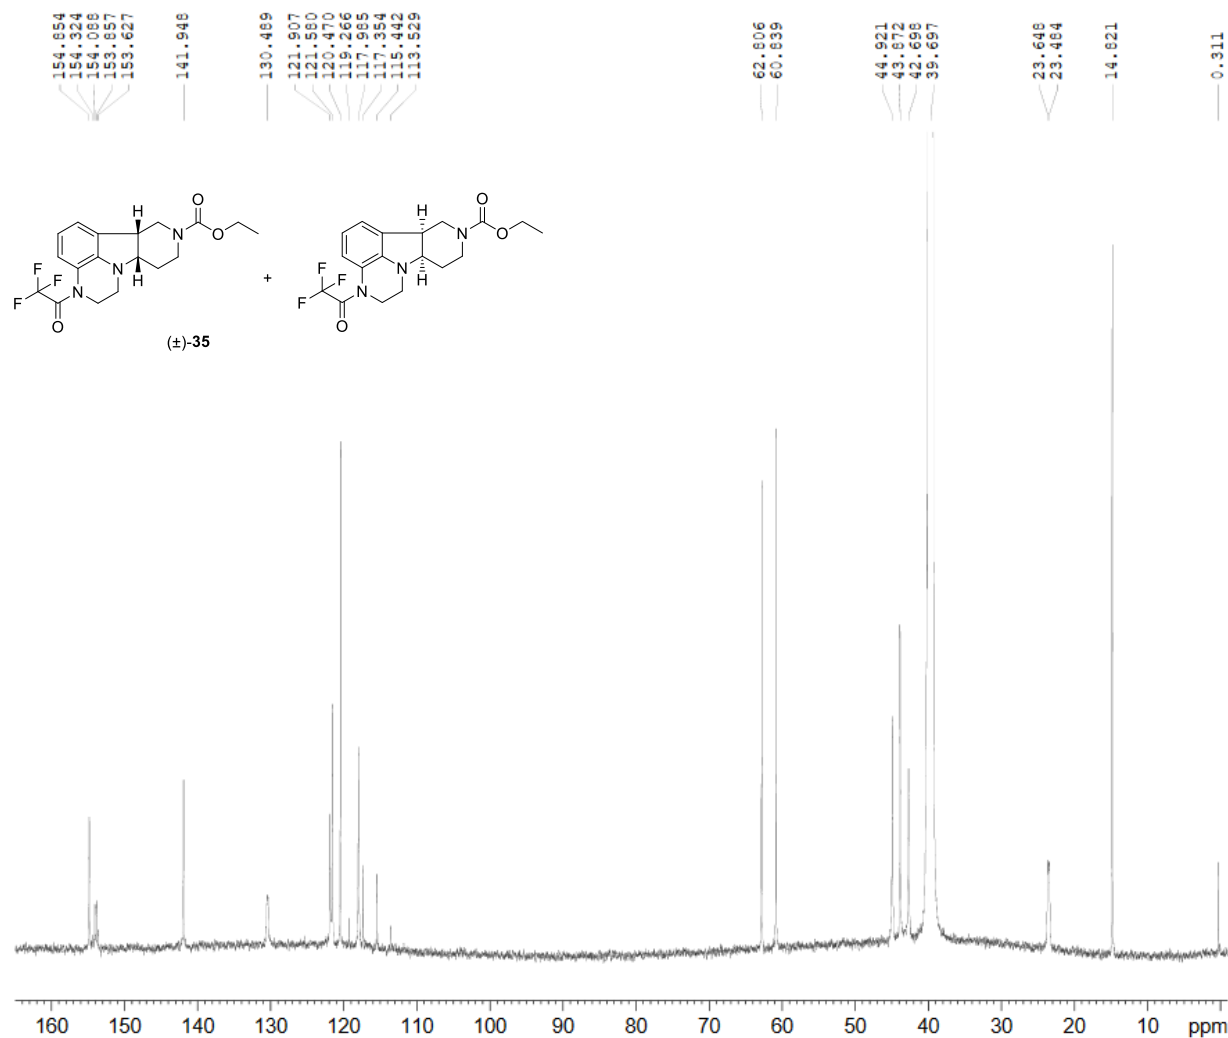

Standard 13C  
122535  
LVE0031\_1  
Milen Matyas  
2017.06.28. (HJ)

Current Data Parameters  
NAME 122535  
EXPNO 12  
PROCNO 1

F2 - Acquisition Parameters  
Date\_ 20170628  
Time 12.40  
INSTRUM spect  
PROBHD 5 mm CPPBBO BB  
PULPROG zgpg30  
TD 65536  
SOLVENT DMSO  
NS 4096  
DS 4  
SWH 36057.691 Hz  
FIDRES 0.550197 Hz  
AQ 0.9087659 sec  
RG 196.07  
DW 13.867 usec  
DE 18.00 usec  
TE 295.0 K  
D1 1.50000000 sec  
D11 0.03000000 sec  
TD0 1

===== CHANNEL f1 =====  
SFO1 150.9254424 MHz  
NUC1 13C  
P1 10.00 usec  
PLW1 65.00000000 W

===== CHANNEL f2 =====  
SFO2 600.1624006 MHz  
NUC2 1H  
CPDPRG2 waltz16  
PCPD2 70.00 usec  
PLW2 28.00000000 W  
PLW12 0.75571001 W  
PLW13 0.37029999 W

F2 - Processing parameters  
SI 65536  
SF 150.9103921 MHz  
WDW EM  
SSB 0  
LB 3.00 Hz  
GB 0  
PC 1.20

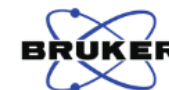

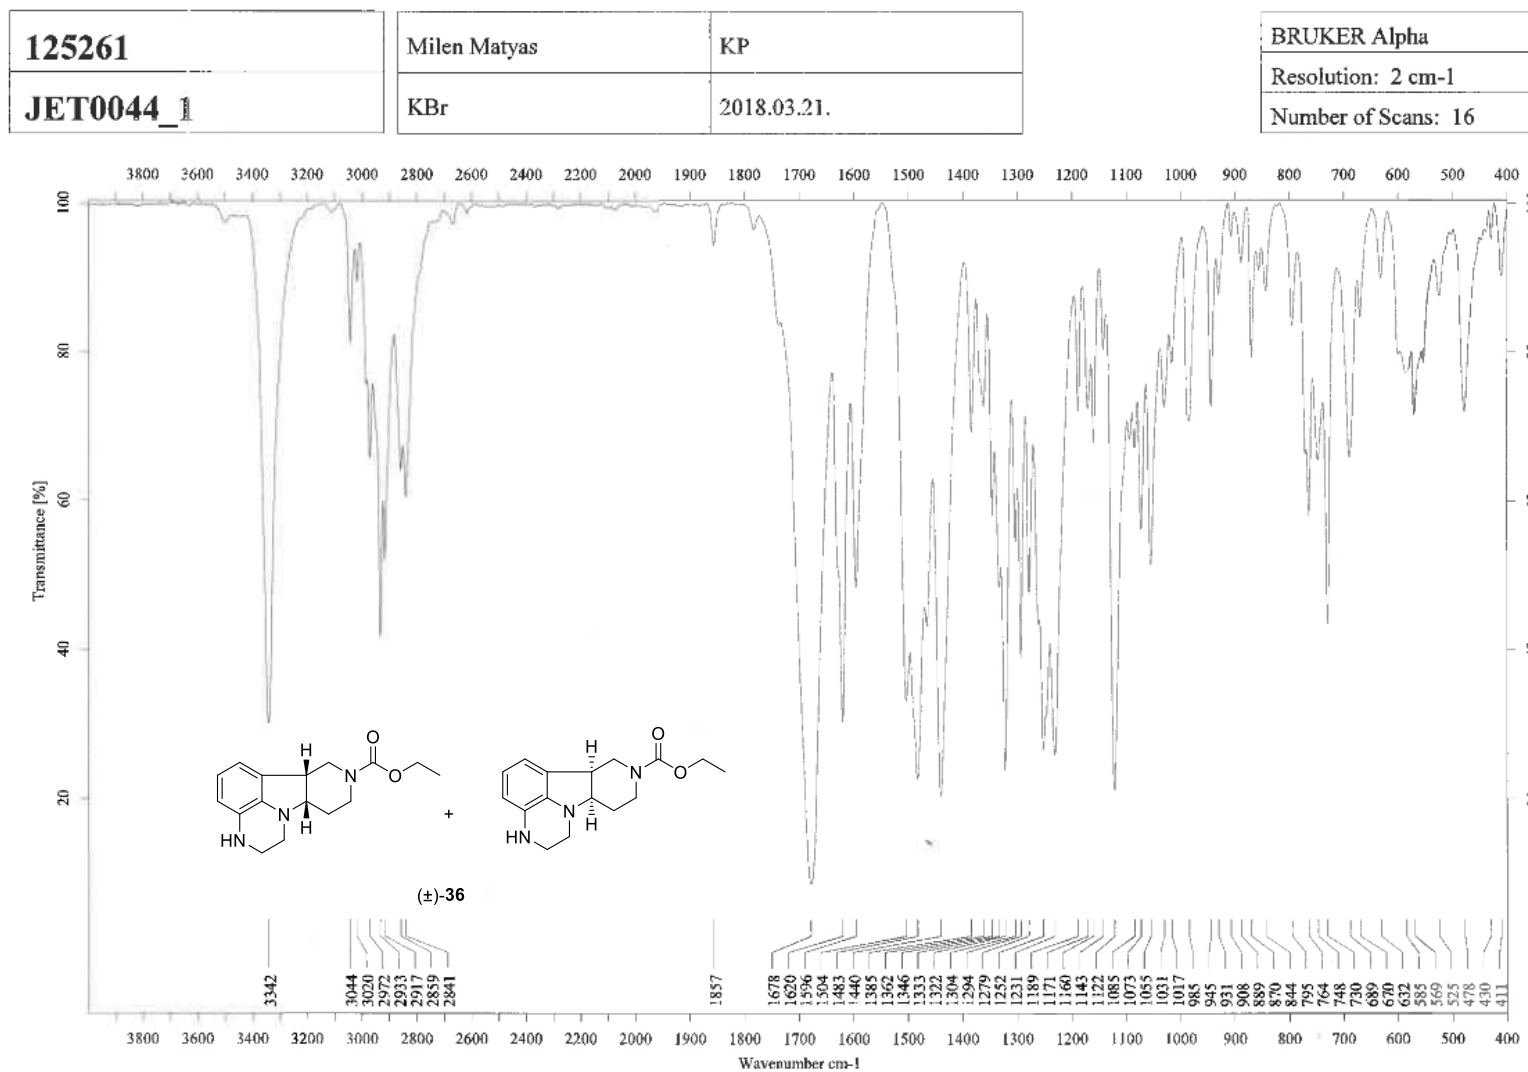

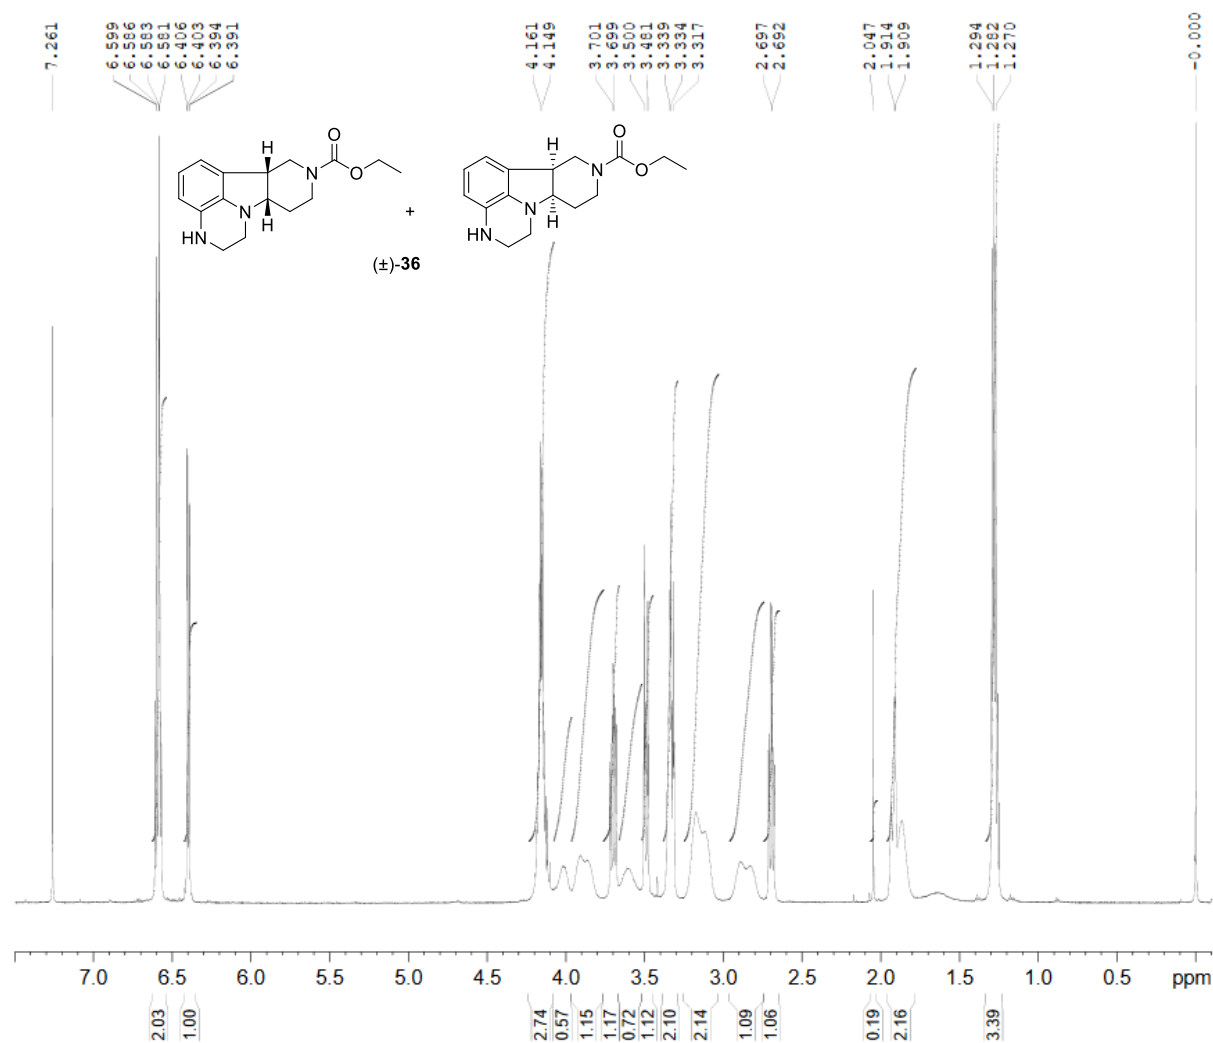

Standard 1H  
125261  
JET0044\_1  
Milen Matyas  
2018.03.21. (DA)

Current Data Parameters  
NAME 125261  
EXPNO 11  
PROCNO 1

F2 - Acquisition Parameters  
Date\_ 20180321  
Time 23.06 h  
INSTRUM spect  
PROBHD Z145856\_0002 (   
PULPROG zg30  
TD 65536  
SOLVENT CDCl3  
NS 16  
DS 4  
SWH 12626.263 Hz  
FIDRES 0.385323 Hz  
AQ 2.5952256 sec  
RG 155.77  
DW 39.600 usec  
DE 25.00 usec  
TE 295.0 K  
D1 1.00000000 sec  
TD0 1  
SFO1 600.1642011 MHz  
NUC1 1H  
P1 11.50 usec  
PLW1 28.00000000 W

F2 - Processing parameters  
SI 65536  
SF 600.1600144 MHz  
WDW no  
SSB 0  
LB 0 Hz  
GB 0  
PC 1.00

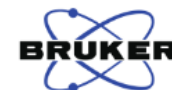

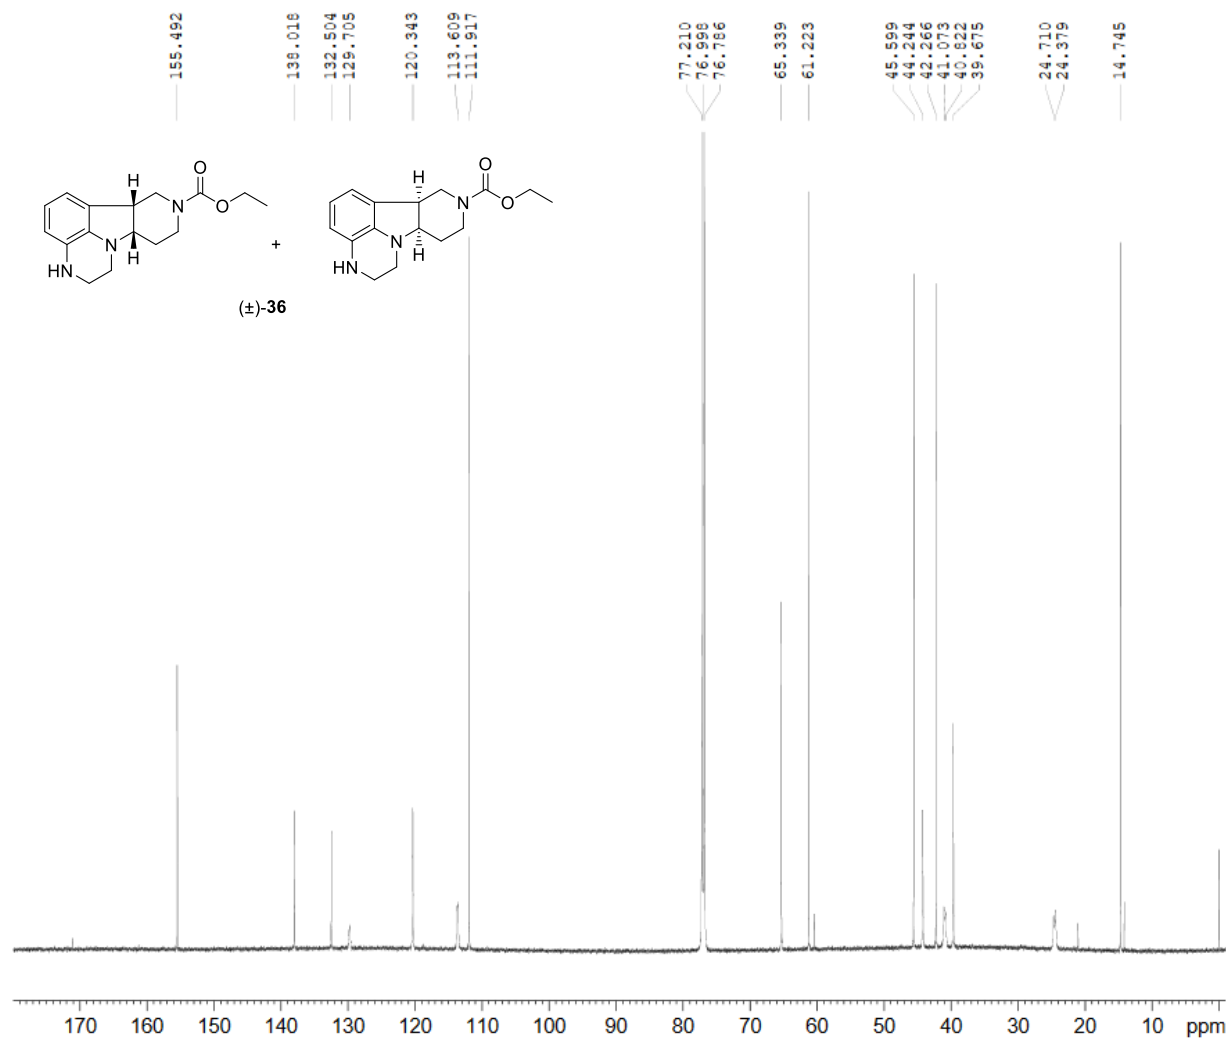

Standard 13C  
125261  
JET0044\_1  
Milen Matyas  
2018.03.21. (DA)

Current Data Parameters  
NAME 125261  
EXPNO 12  
PROCNO 1

F2 - Acquisition Parameters  
Date\_ 20180322  
Time\_ 1.56 h  
INSTRUM spect  
PROBHD Z145856\_0002 (   
PULPROG zgpg30  
TD 65536  
SOLVENT CDCl3  
NS 4096  
DS 4  
SWH 36057.691 Hz  
FIDRES 1.100393 Hz  
AQ 0.9087659 sec  
RG 196.07  
DW 13.867 usec  
DE 18.00 usec  
TE 295.0 K  
D1 1.50000000 sec  
D11 0.03000000 sec  
TD0 1  
SFO1 150.9254424 MHz  
NUC1 13C  
P1 10.00 usec  
PLW1 60.36299896 W  
SFO2 600.1624006 MHz  
NUC2 1H  
CPDPRG2 waltz16  
PCPD2 80.00 usec  
PLW2 26.42600060 W  
PLW12 0.59460002 W  
PLW13 0.29861000 W

F2 - Processing parameters  
SI 65536  
SF 150.9103602 MHz  
WDW EM  
SSB 0  
LB 1.00 Hz  
GB 0  
PC 1.40



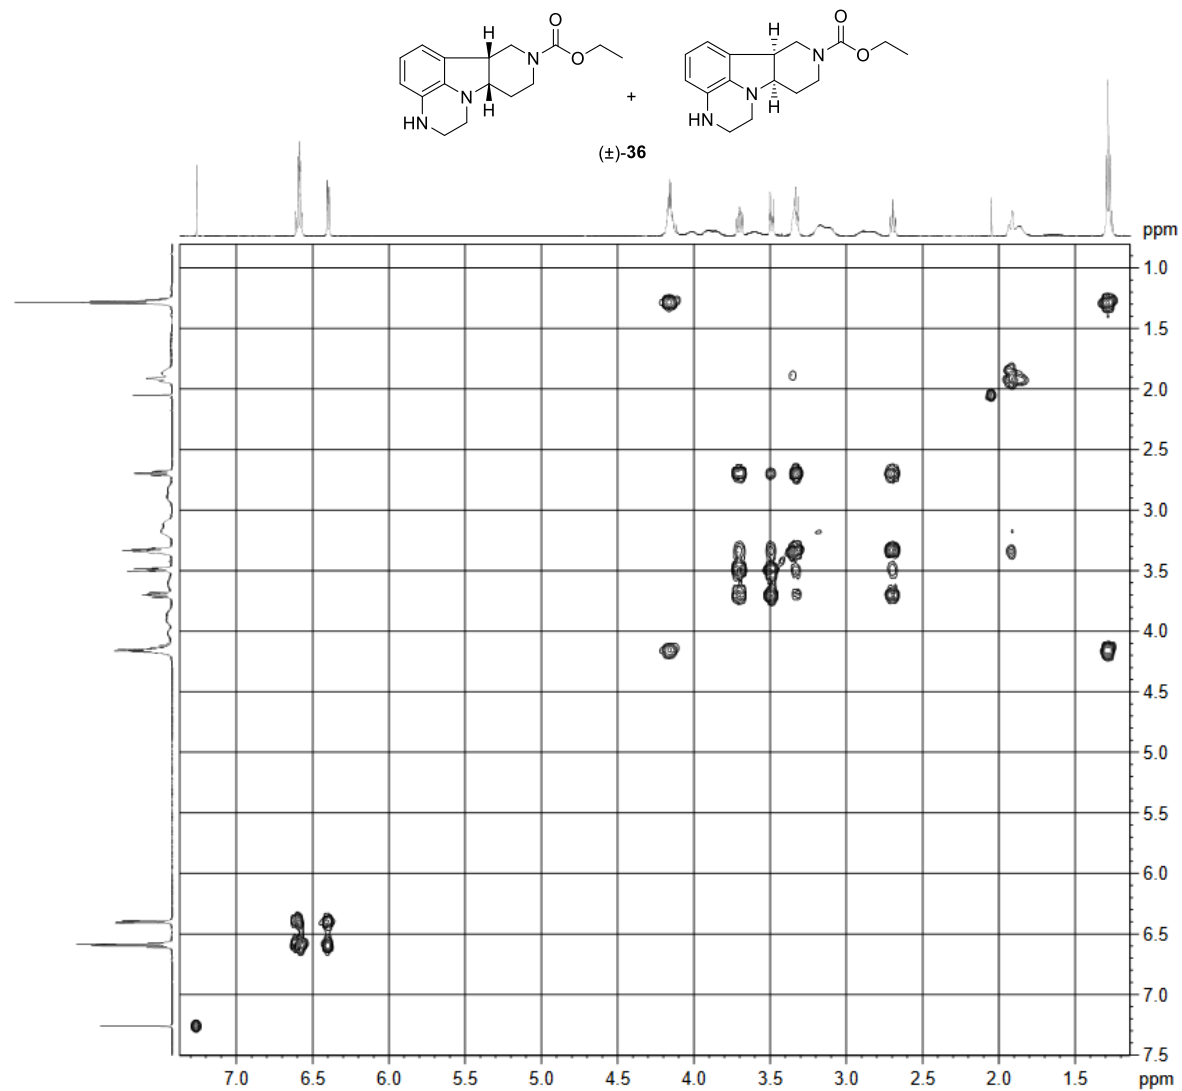

COSY  
 125261  
 JET0044\_1  
 Milen Matyas  
 2018.03.21. (DA)

Current Data Parameters  
 NAME 125261  
 EXPNO 13  
 PROCNO 1  
 F2 - Acquisition Parameters  
 Date\_ 20180322  
 Time 1.37 h  
 INSTRUM spect  
 PROBRG zgpg30 (   
 PULPROG zgpg30  
 TD 65536  
 SOLVENT CDCl3  
 NS 2  
 DS 8  
 SWS 8012.820 Hz  
 FIDRES 0.000000 Hz  
 AQ 0.1277982 sec  
 RG 198.07  
 SW 62.400 usec  
 DE 25.00 usec  
 TE 298.2 K  
 DO 0.0000000 sec  
 D1 2.0000000 sec  
 D11 0.0000000 sec  
 D12 0.0000000 sec  
 D13 0.0000000 sec  
 D16 0.0000000 sec  
 INO 0.0001248 sec  
 TDev 1  
 SFO1 600.135000 MHz  
 NUC1 13  
 PC 11.00 usec  
 PL 11.00 usec  
 PL1 2500.00 usec  
 PL12 25.0000000 W  
 PL13 2.8247982 W  
 GPHAS1 0.0000000  
 SFO2 10.00 MHz  
 P16 1000.00 usec  
 F1 - Acquisition parameters  
 TD 256  
 SFO1 600.135000 MHz  
 FIDRES 0.0001248 Hz  
 SW 13.351 ppm  
 FWHM 0.4  
 F2 - Processing parameters  
 SI 32768  
 SF 600.135000 MHz  
 WHW 0.520000  
 SSB 0  
 LB 0 Hz  
 GB 0  
 PC 1.40  
 F1 - Processing parameters  
 SI 32768  
 SF 600.135000 MHz  
 WHW 0.520000  
 SSB 0  
 LB 0 Hz  
 GB 0

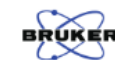

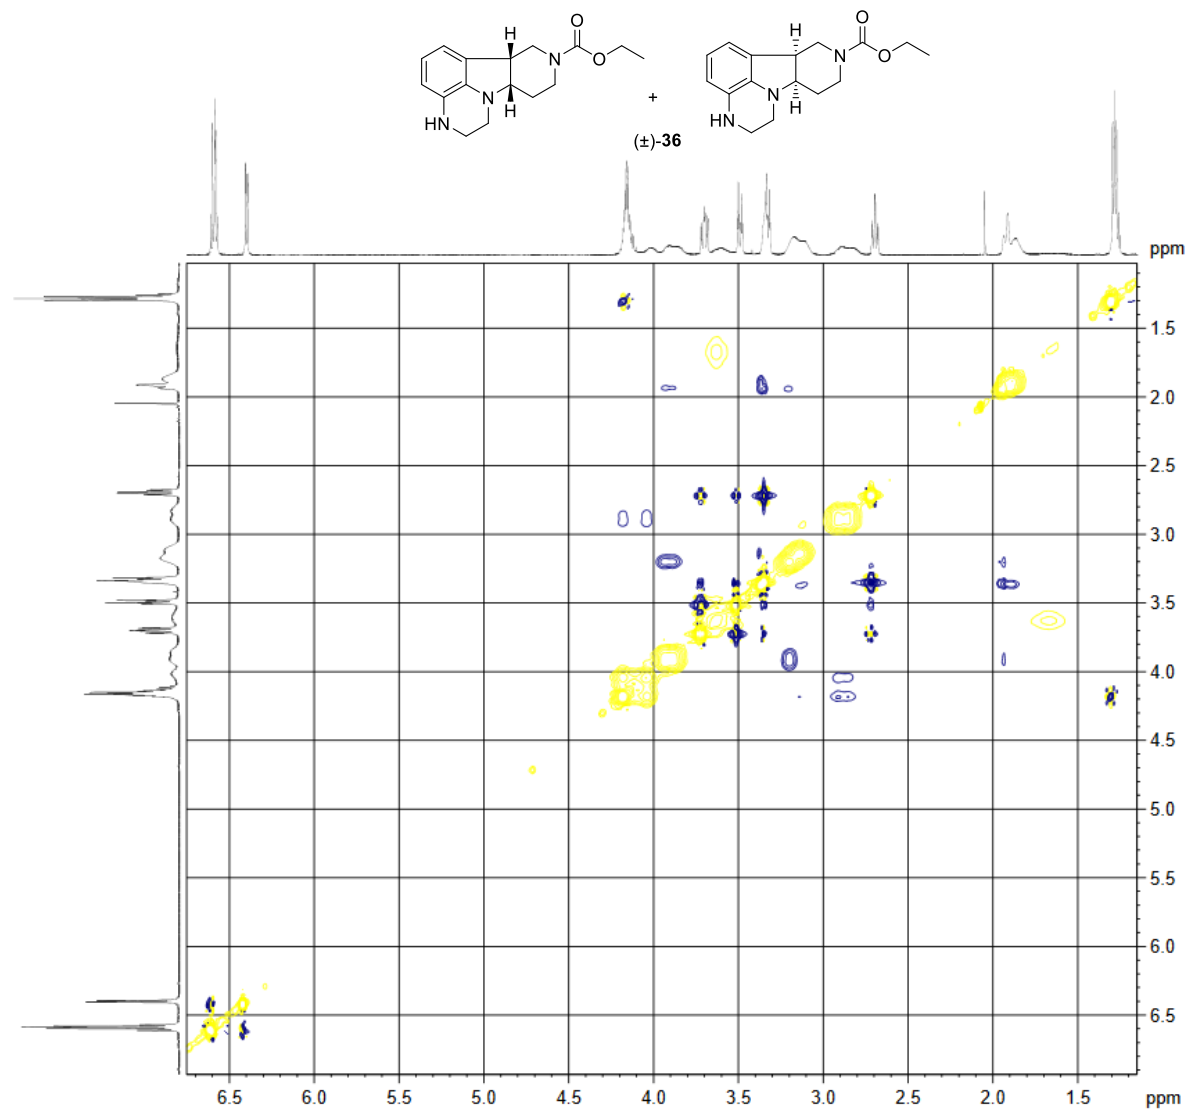

NOESY  
125261  
JET0044\_1  
Milen Matyas  
2018.03.21. (DA)

Current Data Parameters  
NAME 125261  
EXPNO 16  
PROCNO 1

F2 - Acquisition Parameters  
Date\_ 20180322  
Time 3.17 h  
INSTRUM spect  
PROBHD Z145558\_0002 (   
PULPROG zgpg30  
TD 32768  
SOLVENT CDCl3  
NS 16  
DS 4  
SWH 600.619 Hz  
FIDRES 0.000160 Hz  
AQ 0.1703936 sec  
RG 198.07  
SW 61.300 usec  
DE 25.00 usec  
TE 298.0 K  
DO 0.0000000 sec  
D1 2.0000000 sec  
D8 0.0000001 sec  
D11 0.0300000 sec  
D12 0.0002000 sec  
D16 0.0000000 sec  
INQ 0.0001640 sec  
TDov 1  
SFO1 600.1627622 MHz  
NUC1 1H  
P1 11.00 usec  
P2 23.00 usec  
P17 2500.00 usec  
PLH1 28.0000000 W  
PLH10 2.32479992 W  
GPHAS1 0.0000000  
SFO2 40.00 MHz  
P18 1000.00 usec

F1 - Acquisition parameters  
TD 32768  
SFO1 600.1627622 MHz  
FIDRES 0.000160 Hz  
SW 61.300 usec  
DE 25.00 usec  
TE 298.0 K  
DO 0.0000000 sec  
D1 2.0000000 sec  
D8 0.0000001 sec  
D11 0.0300000 sec  
D12 0.0002000 sec  
D16 0.0000000 sec  
INQ 0.0001640 sec  
TDov 1  
SFO1 600.1627622 MHz  
NUC1 1H  
P1 11.00 usec  
P2 23.00 usec  
P17 2500.00 usec  
PLH1 28.0000000 W  
PLH10 2.32479992 W  
GPHAS1 0.0000000  
SFO2 40.00 MHz  
P18 1000.00 usec

F2 - Processing parameters  
SI 32768  
SF 600.1600000 MHz  
WDW 0.500000  
SSB 2  
LB 0 Hz  
GB 0  
PC 1.00

F1 - Processing parameters  
SI 32768  
SF 600.1600000 MHz  
WDW 0.500000  
SSB 2  
LB 0 Hz  
GB 0  
PC 1.00





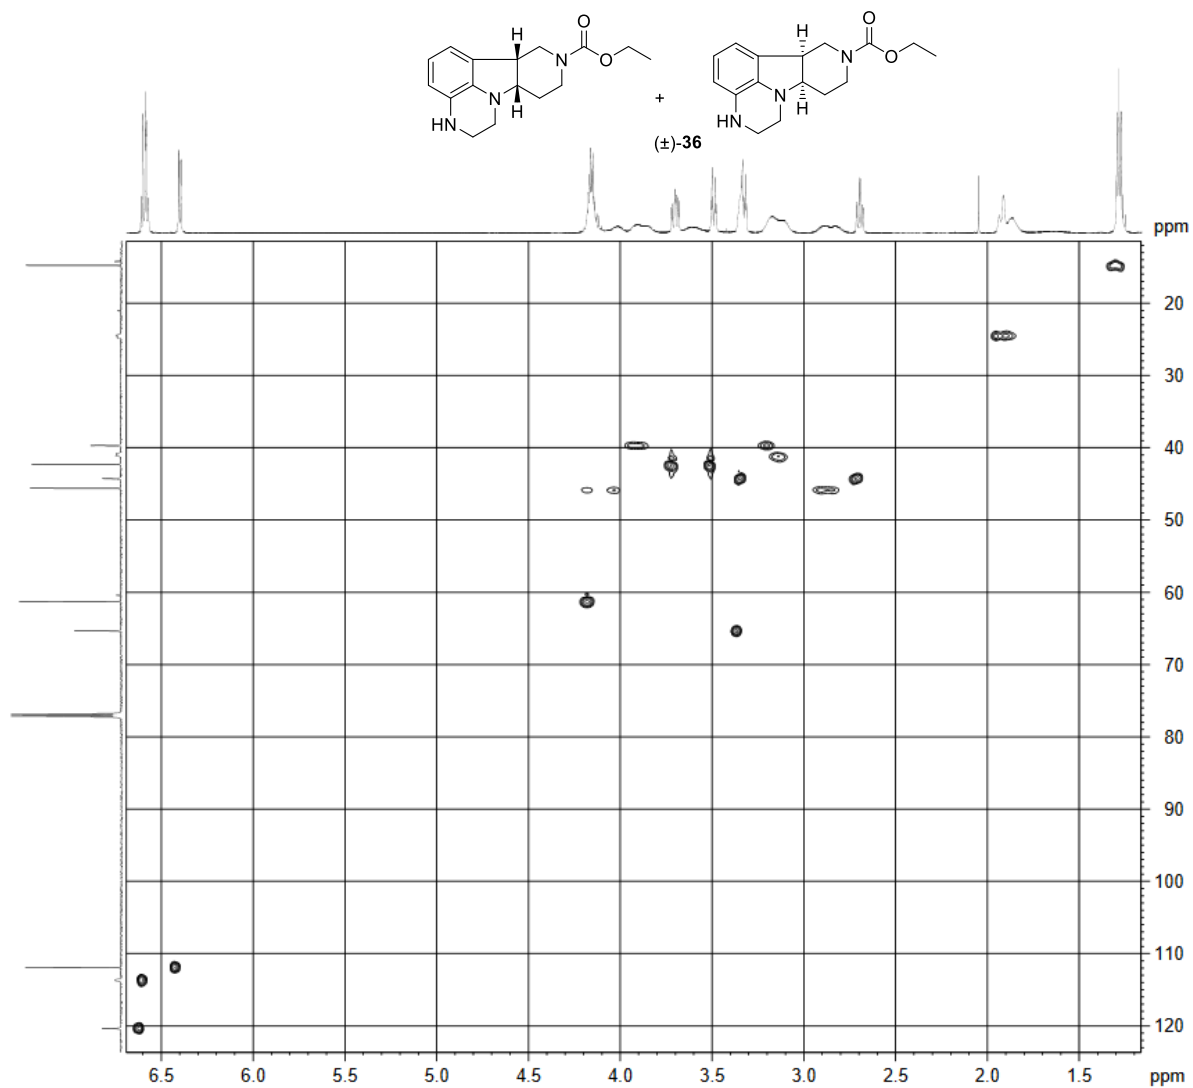

HSQC (140 Hz)  
 125261  
 JET0044\_1  
 Milen Matyas  
 2018.03.21. (DA)

Current Data Parameters  
 NAME 125261  
 EXPNO 14  
 PROCNO 1  
 F2 - Acquisition Parameters  
 Date\_ 20180322  
 Time 2.17 h  
 INSTRUM spect  
 PROBHD Z145558\_0002 (4  
 PULPROG hsqcwgpp  
 ID 2045  
 SOLVENT CDCl3  
 NS 4  
 DS 16  
 SWH 7612.500 Hz  
 FIDRES 7.693800 Hz  
 AQ 0.1310720 sec  
 RG 188.07  
 SH 64.000 usec  
 SE 25.00 usec  
 TE 298.0 K  
 CHST2 140.0000000 sec  
 DO 0.00000000 sec  
 DL 1.00000000 sec  
 D4 0.00178571 sec  
 D11 0.03000000 sec  
 D16 0.00000000 sec  
 INO 0.00001510 sec  
 TDev 1  
 LOGPERS  
 SFO1 600.136085 MHz  
 HOC1 16  
 P1 11.00 usec  
 P2 25.00 usec  
 P15 0 usec  
 PLH1 28.00000000 W  
 SFO2 150.9269222 MHz  
 HOC2 16C  
 CPDPRG2 gppp  
 P3 10.00 usec  
 P4 20.00 usec  
 PCPD2 50.00000000 W  
 PLH2 1.88226596 W  
 SFOH(1) SWSQ10.100  
 SP11 50.00 %  
 SFOH(2) SWSQ10.100  
 SP12 20.10 %  
 P16 1000.00 usec  
 F1 - Acquisition parameters  
 ID 204  
 SFO1 150.927 MHz  
 FIDRES 258.692047 Hz  
 SW 219.382 ppm  
 FWHOME Echo-Antiecho  
 F2 - Processing parameters  
 SI 1024  
 SF 600.1360000 MHz  
 MDH CSINE  
 SSB 2  
 LB 0 Hz  
 GB 0  
 PC 1.40  
 F1 - Processing parameters  
 SI 1024  
 MC2 echo-antiecho  
 SF 150.9105920 MHz  
 MDH CSINE  
 SSB 2  
 LB 0 Hz  
 GB 0



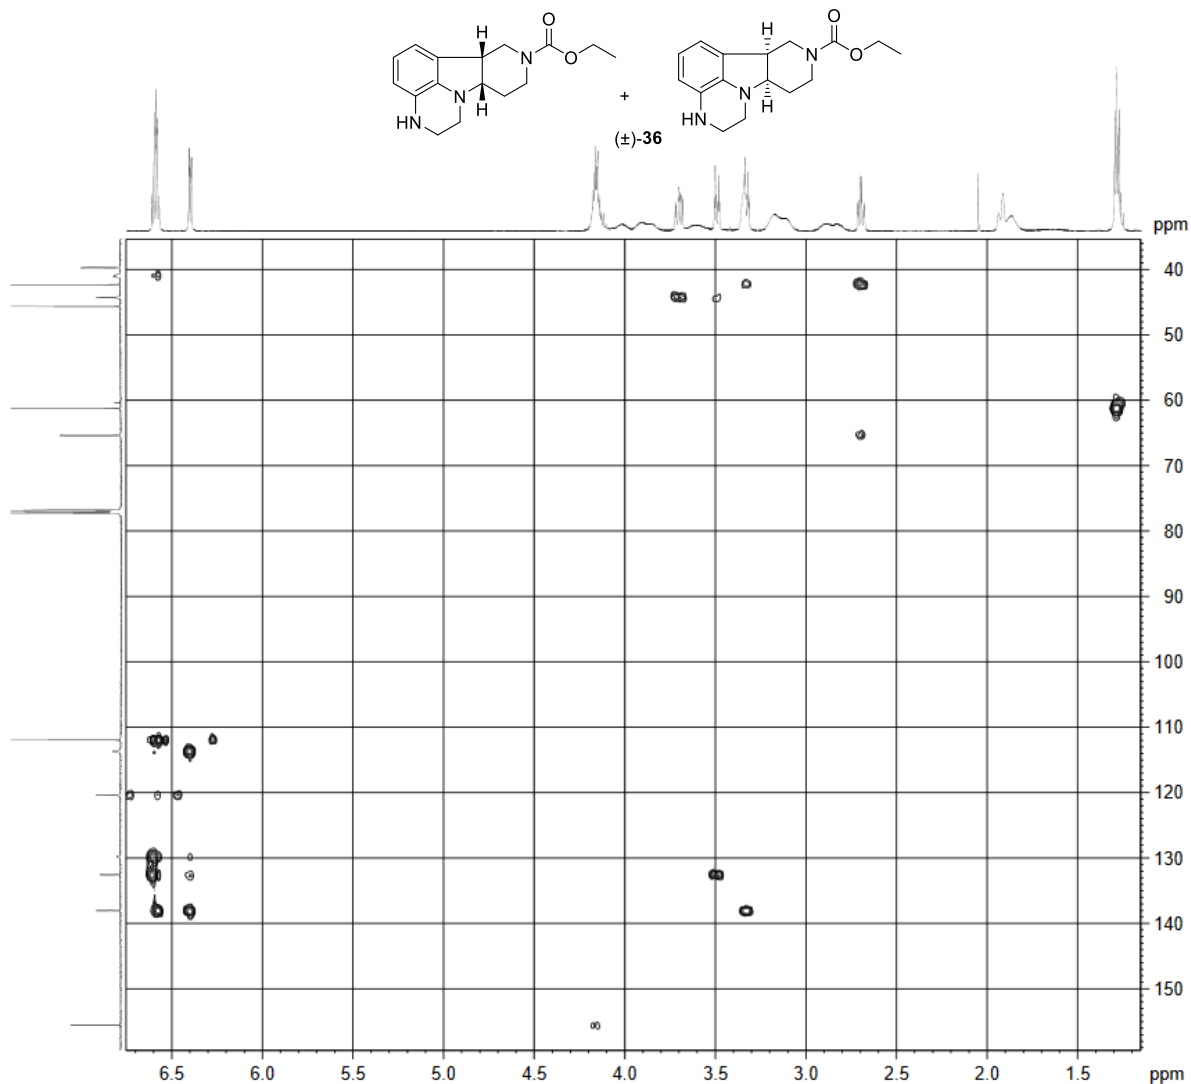

```

Current Data Parameters
NAME          125701
EXPNO        15
PROCNO       10
F2 - Acquisition Parameters
-----
SI          300.000000 MHz
Time        2.47 h
INSTNUM     888888
PROCNAME    125701_01_000000
PULPROG     hmcbrp1p1qmc
RG           2048
SOLVENT     CDCl3
NS           4
DS           5
SWH          7812.500 MHz
FIDRES       7.629990 MHz
AQ           0.1310720 sec
RG2          1.000000
AQ2          0.1310720 sec
DM           64.000000 sec
DE           23.000000 sec
TE           293.2 K
CHST2       140.000000 sec
CHST13      0.0000000 sec
SI           300.000000 MHz
DL           1.80000000 sec
DQ           0.00387143 sec
DE           0.00000000 sec
DLS          0.00000000 sec
DLS2         0.00000000 sec
TD          65536
TDECQ       800.1695910 MHz
STOL         15.000000 sec
P1           12.000000 sec
P2           12.000000 sec
P3           25.0000000 sec
P4           100.8229932 MHz
NUC1         13C
NUC2         13C
P5           80.26299996 MHz
SFWAH(1)    30.000000 sec
SFWAH(2)    30.000000 sec
SFWAH(3)    30.000000 sec
SFWAH(4)    30.000000 sec
SFWAH(5)    30.000000 sec
SFWAH(6)    40.000000 sec
SFWAH(7)    40.000000 sec
SFWAH(8)    50.000000 sec
F1 - Acquisition parameters
-----
SI          300.000000 MHz
Time        2.58 h
INSTNUM     888888
PROCNAME    125701_01_000000
PULPROG     hmcbrp1p1qmc
RG           2048
SOLVENT     CDCl3
NS           4
DS           5
SWH          7812.500 MHz
FIDRES       7.629990 MHz
AQ           0.1310720 sec
RG2          1.000000
AQ2          0.1310720 sec
DM           64.000000 sec
DE           23.000000 sec
TE           293.2 K
CHST2       140.000000 sec
CHST13      0.0000000 sec
SI           300.000000 MHz
DL           1.80000000 sec
DQ           0.00387143 sec
DE           0.00000000 sec
DLS          0.00000000 sec
DLS2         0.00000000 sec
TD          65536
TDECQ       800.1695910 MHz
STOL         15.000000 sec
P1           12.000000 sec
P2           12.000000 sec
P3           25.0000000 sec
P4           100.8229932 MHz
NUC1         13C
NUC2         13C
P5           80.26299996 MHz
SFWAH(1)    30.000000 sec
SFWAH(2)    30.000000 sec
SFWAH(3)    30.000000 sec
SFWAH(4)    30.000000 sec
SFWAH(5)    30.000000 sec
SFWAH(6)    40.000000 sec
SFWAH(7)    40.000000 sec
SFWAH(8)    50.000000 sec
F2 - Processing parameters
-----
SI          300.000000 MHz
Time        2.58 h
INSTNUM     888888
PROCNAME    125701_01_000000
PULPROG     hmcbrp1p1qmc
RG           2048
SOLVENT     CDCl3
NS           4
DS           5
SWH          7812.500 MHz
FIDRES       7.629990 MHz
AQ           0.1310720 sec
RG2          1.000000
AQ2          0.1310720 sec
DM           64.000000 sec
DE           23.000000 sec
TE           293.2 K
CHST2       140.000000 sec
CHST13      0.0000000 sec
SI           300.000000 MHz
DL           1.80000000 sec
DQ           0.00387143 sec
DE           0.00000000 sec
DLS          0.00000000 sec
DLS2         0.00000000 sec
TD          65536
TDECQ       800.1695910 MHz
STOL         15.000000 sec
P1           12.000000 sec
P2           12.000000 sec
P3           25.0000000 sec
P4           100.8229932 MHz
NUC1         13C
NUC2         13C
P5           80.26299996 MHz
SFWAH(1)    30.000000 sec
SFWAH(2)    30.000000 sec
SFWAH(3)    30.000000 sec
SFWAH(4)    30.000000 sec
SFWAH(5)    30.000000 sec
SFWAH(6)    40.000000 sec
SFWAH(7)    40.000000 sec
SFWAH(8)    50.000000 sec

```

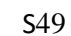

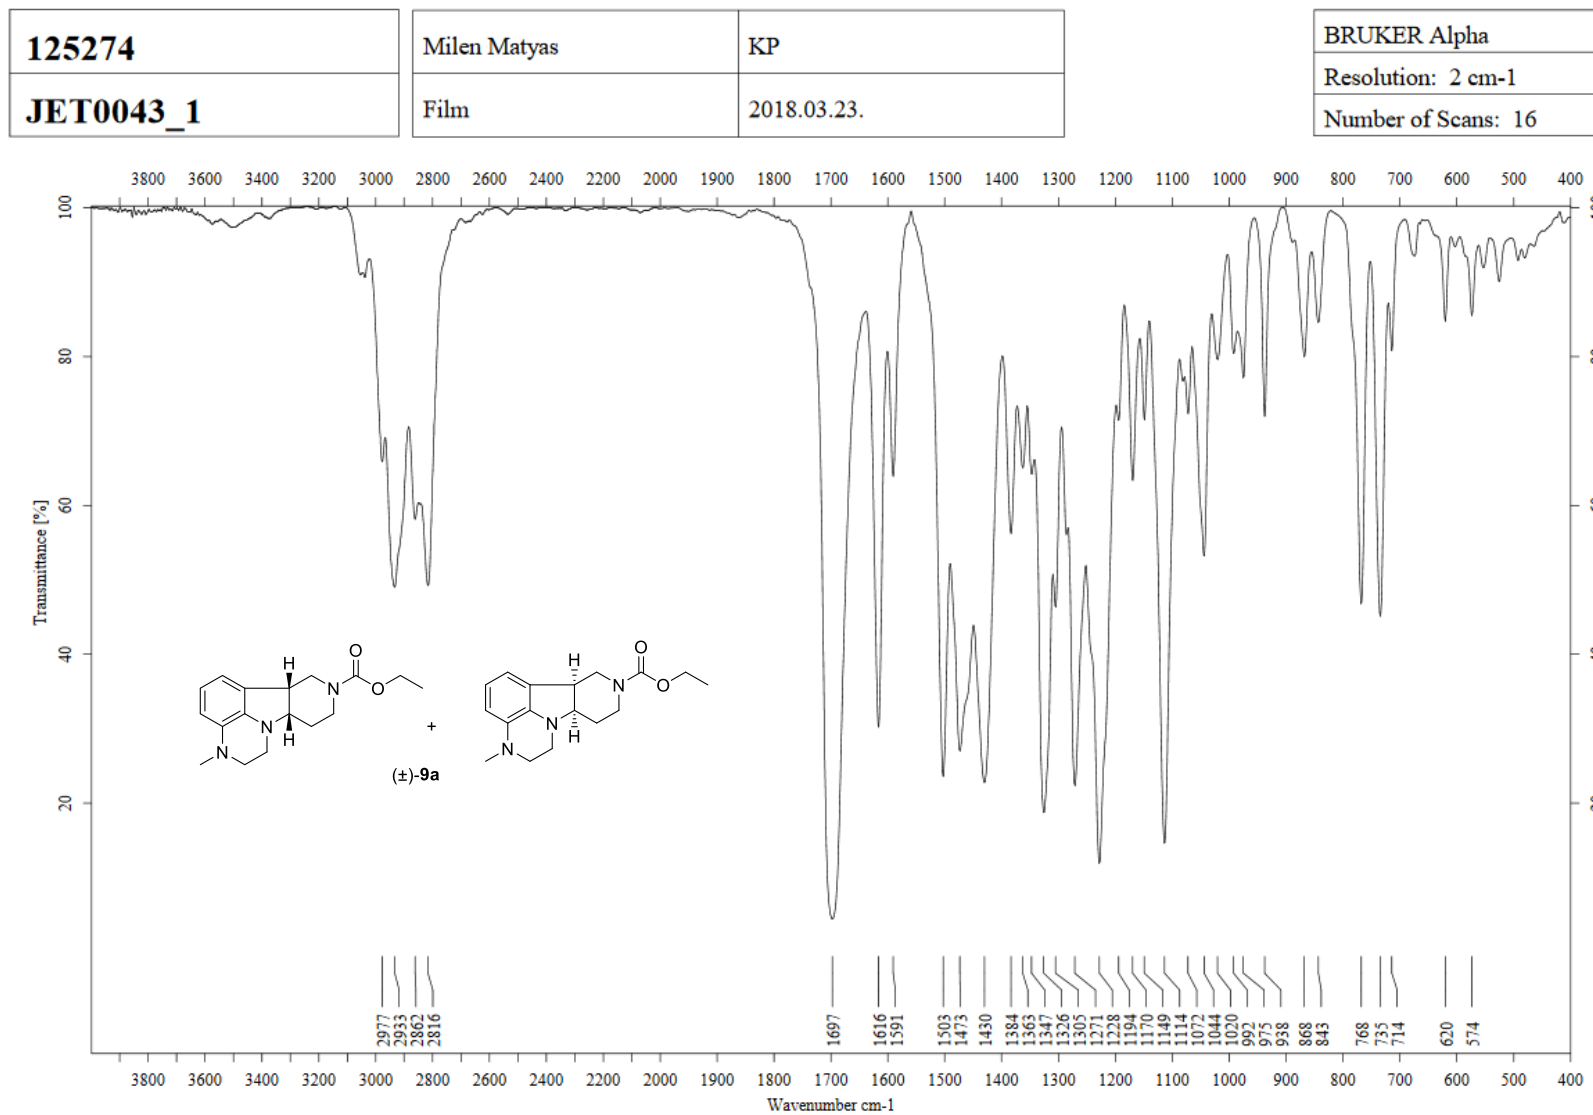

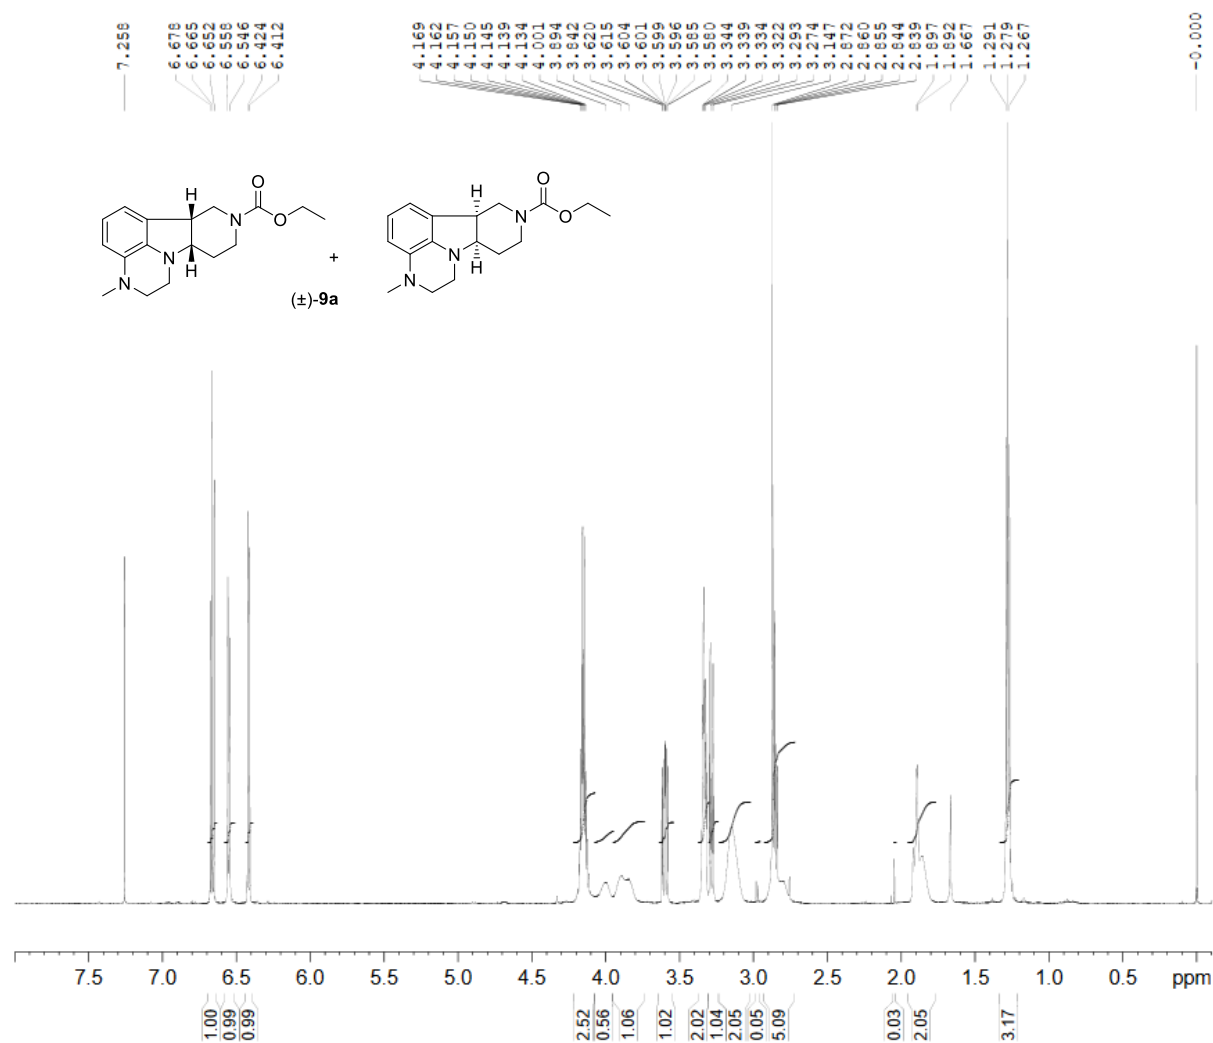

Standard 1H  
125274  
JET0043\_1  
Milen Matyas  
2018.03.26. (DA)

Current Data Parameters  
NAME 125274  
EXPNO 11  
PROCNO 1

F2 - Acquisition Parameters  
Date\_ 20180326  
Time 17.37 h  
INSTRUM spect  
PROBHD Z145856\_0002 (  
PULPROG zg30  
TD 65536  
SOLVENT CDCl3  
NS 16  
DS 4  
SWH 12626.263 Hz  
FIDRES 0.385323 Hz  
AQ 2.5952256 sec  
RG 111.4  
DW 39.600 usec  
DE 25.00 usec  
TE 295.0 K  
D1 1.00000000 sec  
TD0 1  
SFO1 600.1642011 MHz  
NUC1 1H  
P1 11.50 usec  
PLW1 28.00000000 W

F2 - Processing parameters  
SI 65536  
SF 600.1600159 MHz  
WDW no  
SSB 0  
LB 0 Hz  
GB 0  
PC 1.00

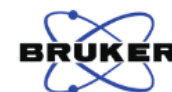

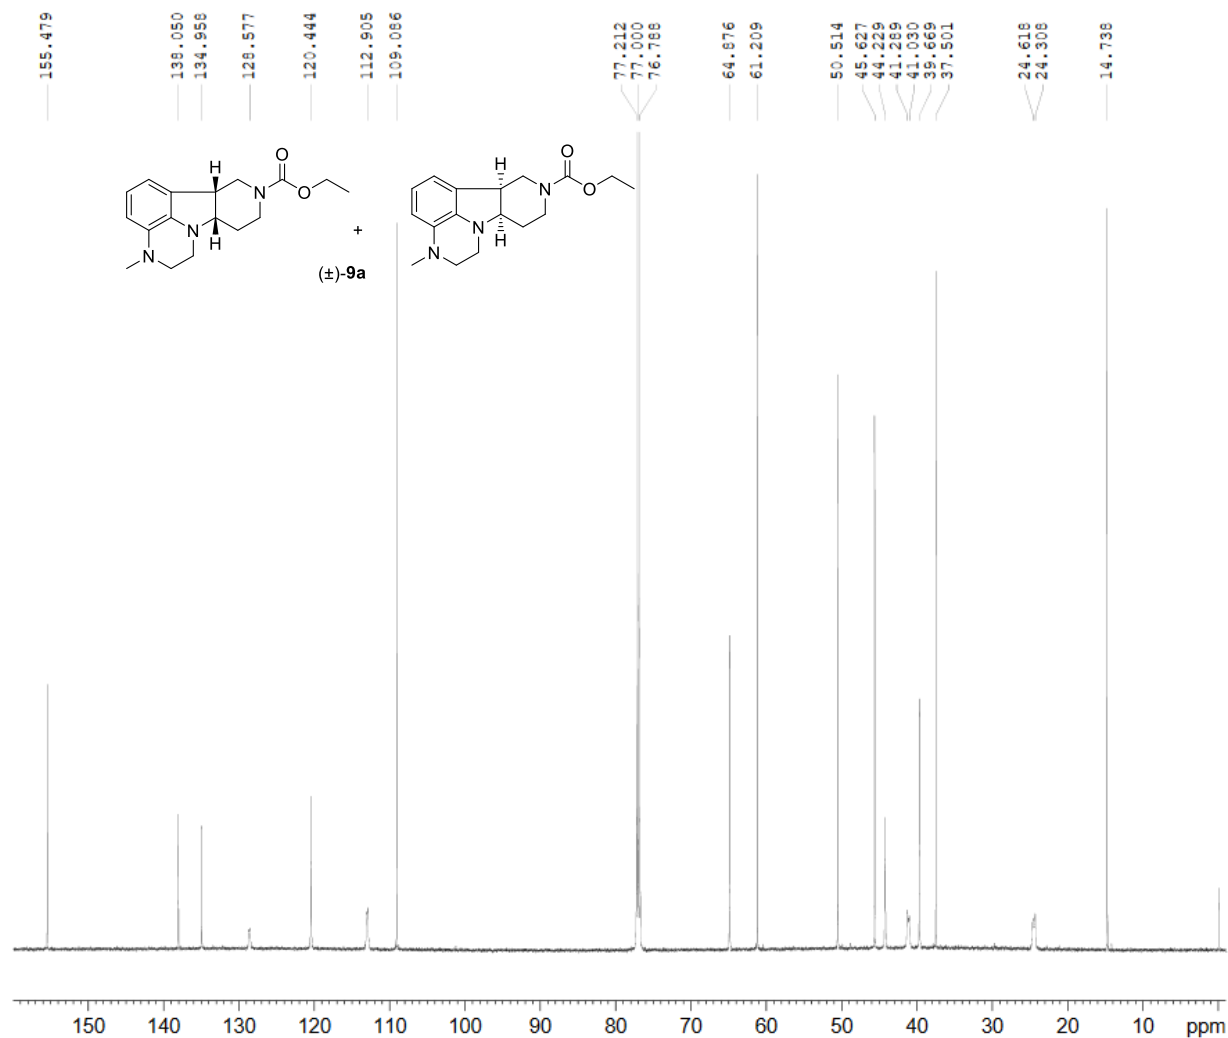

Standard 13C  
125274  
JET0043\_1  
Milen Matyas  
2018.03.26. (DA)

Current Data Parameters  
NAME 125274  
EXPNO 12  
PROCNO 1

F2 - Acquisition Parameters  
Date\_ 20180326  
Time\_ 19.03 h  
INSTRUM spect  
PROBHD Z145856\_0002 (   
PULPROG zgpg30  
TD 65536  
SOLVENT CDCl3  
NS 2048  
DS 4  
SWH 36057.691 Hz  
FIDRES 1.100393 Hz  
AQ 0.9087659 sec  
RG 196.07  
DW 13.867 usec  
DE 18.00 usec  
TE 295.0 K  
D1 1.50000000 sec  
D11 0.03000000 sec  
TD0 1  
SFO1 150.9254424 MHz  
NUC1 13C  
P1 10.00 usec  
PLW1 60.36299896 W  
SFO2 600.1624006 MHz  
NUC2 1H  
CPDPRG[2] waltz16  
PCPD2 80.00 usec  
PLW2 26.42600060 W  
PLW12 0.59460002 W  
PLW13 0.29861000 W

F2 - Processing parameters  
SI 65536  
SF 150.9103614 MHz  
WDW EM  
SSB 0  
LB 1.00 Hz  
GB 0  
PC 1.40



Supplement: Additional file 1 [file 1860-5397-18-66-S1.pdf]
